# Supplementary material for: Defining human mesenchymal and epithelial heterogeneity in response to oral inflammatory disease
Source: bioRxiv preprint, doi:10.1101/2020.09.02.279406, version 1 (2020-09-02)
Supplement: Table S1 [file 279406_file03.xlsx]

## Sheet: All clusters
cluster	gene
0	IGHG1
0	IGHG2
0	JCHAIN
0	MZB1
0	IGHG4
0	IGHG3
0	SSR4
0	XBP1
0	IGKC
0	DERL3
0	SEC11C
0	HERPUD1
0	CD79A
0	PRDX4
0	FKBP11
0	ISG20
0	TENT5C
0	CD27
0	DNAAF1
0	HSP90B1
0	PIM2
0	FCRL5
0	POU2AF1
0	TRIB1
0	RAB30
0	ITM2C
0	GLRX
0	TOR3A
0	TP53INP1
0	ZBP1
0	DUSP5
0	CYTIP
0	BHLHE41
0	TXNDC5
0	CD38
0	PDK1
0	SLAMF7
0	HSH2D
0	TAGAP
0	DUSP4
0	CADM1
0	PIM1
0	MYO1B
0	TNFAIP6
0	CTSL
0	GAPDH
0	TMSB10
0	ZFP36L1
0	ACTB
0	S100A6
0	FTH1
0	ANXA1
0	S100A10
0	AC007952.4
0	EVA1B
0	ANKRD28
0	ENPP2
0	CITED2
0	PFN1
0	CARMN
0	RASSF4
0	ACTG1
0	S100A11
0	TMSB4X
0	PPFIBP1
0	APP
0	ASPN
0	CFL1
0	ADIRF
0	YBX3
0	MEF2C
0	IGLC2
0	METRNL
0	CYBA
0	ARPC1B
0	PHLDA1
0	ODC1
0	CTSB
0	HSPA6
0	CST3
0	HNRNPU
0	TSC22D1
0	LCP2
0	IFITM2
0	CAV2
0	ADA2
0	KRT1
0	SPRY1
0	MDK
0	S100A4
0	PKM
0	RAB31
0	ICAM3
0	PLAUR
0	IFITM3
0	SH3BGRL3
0	DEK
0	PRDM1
0	LMNA
0	SLC2A3
0	HMGB1
0	GLUL
0	SLA
0	TIMP1
0	JUN
0	ST5
0	PFKFB3
0	PALLD
0	SVIL
0	C1orf54
0	CCN2
0	KLF2
0	IGSF6
0	CTSC
0	RGS5
0	EMILIN2
0	IGLC3
0	TUBA1A
0	LGALS3
0	HSPA5
0	MMP14
0	WNT5A
0	NFATC1
0	GNLY
0	TRBC2
0	CAVIN1
0	SERPINH1
0	STEAP1
0	REL
0	NUB1
0	HSPB1
0	PRKG1
0	PRXL2A
0	ENG
0	ENO1
0	SNX3
0	TPM3
0	DUSP6
0	EPS8
0	OSM
0	GZMA
0	ZEB2
0	HIST1H2BG
0	FLNA
0	HMGN2
0	SDC1
0	MT1E
0	TAGLN2
0	TRBC1
0	PLAT
0	APOC1
0	KIAA1217
0	ATP6V1B2
0	DST
0	CRISPLD2
0	DAB2
0	GADD45B
0	TUBB
0	NECTIN2
0	CTSD
0	MYLK
0	MX2
0	FMOD
0	COL14A1
0	TUBA1B
0	PTMS
0	CD248
0	COL4A2
0	AC058791.1
0	GNG11
0	DIPK2A
0	CAVIN2
0	STOM
0	IGFBP7
0	SERPINF1
0	ETS1
0	TCEAL9
0	PXDN
0	IFI44L
0	NFIA
0	SAMHD1
0	ICAM2
0	NLRP3
0	MT2A
0	VWA1
0	LAPTM5
0	FKBP1A
0	TJP1
0	IL1B
0	TXN
0	PDPN
0	FOSL2
0	CD300E
0	TMEM176B
0	ANXA2
0	MS4A1
0	OLFML2B
0	SPAG4
0	FOXP1
0	YPEL2
0	GK
0	TIMP2
0	GZMK
0	AP1S2
0	GBP1
0	IGFBP2
0	TNFSF10
0	IFNGR1
0	CEBPD
0	PALMD
0	LIMS1
0	CD9
0	CD3D
0	MAF
0	IL1RL1
0	DIO2
0	KRT19
0	FGFR1
0	RGS3
0	GLIPR1
0	HNMT
0	IGHA1
0	DSE
0	IGFBP6
0	AKAP12
0	NFIC
0	MAOB
0	TWIST1
0	SOX4
0	TTN
0	C1orf162
0	FKBP10
0	NREP
0	UGCG
0	NR4A2
0	PPP1R14B
0	CD4
0	A2M
0	CLEC2B
0	NSMCE1
0	C11orf96
0	SPARCL1
0	GRASP
0	RORB
0	NFKBIZ
0	MS4A6A
0	NRP2
0	GZMB
0	EREG
0	CD59
0	FXYD3
0	SLC16A3
0	SLC9A3R2
0	AHR
0	CCDC102B
0	LTC4S
0	NCOA7
0	TNFAIP2
0	EMILIN1
0	CTSS
0	RAB11FIP1
0	CTHRC1
0	RILPL2
0	ACTN1
0	GNG12
0	CREG1
0	FCER1G
0	PGRMC1
0	TPSAB1
0	MAP1B
0	CPA3
0	ARL6IP1
0	HPGD
0	SERPINB1
0	TYROBP
0	ADCYAP1
0	HAS2
0	CKLF
0	ADRB2
0	LAT
0	VWF
0	CEBPB
0	CYBB
0	RAB13
0	CD55
0	DUSP1
0	CD93
0	ID2
0	CD7
0	VIM
0	PLPP3
0	EPHX1
0	FCGR2A
0	FSCN1
0	CD3E
0	GSTP1
0	LY6E
0	LAMB3
0	ID3
0	IQGAP2
0	LYN
0	F2R
0	CCDC71L
0	CYTOR
0	LMO2
0	NR2F2
0	CRIP2
0	GGT5
0	SORL1
0	LIMA1
0	CBR1
0	ITGAV
0	EHD2
0	DUSP23
0	ACP5
0	CLEC11A
0	RBFOX2
0	SNAI2
0	CTSH
0	GPSM3
0	ADAMTS1
0	PLAU
0	CHMP1B
0	PPIC
0	SLC20A1
0	PTN
0	TPSB2
0	ARHGDIB
0	NAAA
0	CTSG
0	GATA2
0	PTP4A3
0	RNASE1
0	RRAD
0	HBA2
0	LGALS3BP
0	LITAF
0	KCTD12
0	PLXND1
0	CAV1
0	CCND2
0	ETS2
0	GIMAP4
0	TNS2
0	BCL6
0	LAMA4
0	VAMP5
0	ABCA1
0	ALOX5AP
0	EGR1
0	ETV3
0	FBLN1
0	NABP1
0	LGALS9
0	TNFRSF12A
0	PPT1
0	SLC40A1
0	KIT
0	RGS16
0	CXCR4
0	IL32
0	SPIB
0	MARCKS
0	BGN
0	MXD1
0	AHNAK
0	GSN
0	HAPLN3
0	SYNPO2
0	CCL3
0	PLAC9
0	NKG7
0	ASPH
0	AXL
0	IL18
0	KLF4
0	CXCL16
0	SLC18A2
0	CXCL2
0	HLA-DMA
0	MS4A2
0	IL4I1
0	HOPX
0	C15orf48
0	CD96
0	H1FX
0	GPNMB
0	EGR3
0	HLA-DRA
0	LCK
0	JAG1
0	SAMSN1
0	ANTXR1
0	SMAD1
0	ARL4C
0	CCL4L2
0	EMP2
0	EGFR
0	ALDH2
0	MT1X
0	CAPG
0	SPATS2L
0	TCIM
0	IER3
0	DLC1
0	CLEC7A
0	NAMPT
0	CALCRL
0	HLA-DPB1
0	TMEM176A
0	TAGLN
0	IER5L
0	SOD3
0	C12orf75
0	ITGAX
0	ADGRE2
0	RGS13
0	LAIR1
0	ITM2A
0	SELL
0	CDH11
0	CTSK
0	WWTR1
0	HLA-DQA1
0	CD83
0	CD2
0	RAB32
0	UBD
0	CPNE3
0	FCN1
0	CD48
0	SELE
0	ITGA1
0	DNASE1L3
0	CPXM1
0	F13A1
0	ENAH
0	MARCKSL1
0	CXCL8
0	ACTA2
0	SERPINE2
0	PCOLCE
0	IKZF1
0	HMGB2
0	SERPING1
0	CEMIP2
0	EFEMP2
0	APCDD1
0	TBX3
0	DAPL1
0	CFD
0	IRF8
0	PTPRC
0	KDM6B
0	NFIX
0	STAT1
0	AOAH
0	LDLRAD4
0	LAMB2
0	UACA
0	VWA5A
0	GUCY1A1
0	SERPINA1
0	NRP1
0	ARRB2
0	COL17A1
0	S100A2
0	THY1
0	LAMC1
0	FRMD6
0	COTL1
0	FRMD4B
0	TFRC
0	HEG1
0	RUNX3
0	SOD2
0	PHACTR1
0	PPIF
0	EMCN
0	CTSZ
0	LGALS2
0	CD69
0	CCL5
0	ATOX1
0	H2AFY
0	GJA1
0	CSF1R
0	LYZ
0	PHLDA2
0	DUT
0	EFHD2
0	SERPINE1
0	COL16A1
0	LHFPL6
0	CPE
0	KYNU
0	ACOT7
0	GPRIN3
0	RND3
0	SERPINB9
0	LBH
0	NBL1
0	FHL1
0	HPGDS
0	KLF9
0	MFAP4
0	LAPTM4B
0	IGFBP4
0	CTNNAL1
0	DCN
0	AC020916.1
0	ICAM1
0	LGALS1
0	ITGB5
0	CHN1
0	HLA-DMB
0	LTB
0	SHTN1
0	EDNRA
0	CD14
0	GIMAP7
0	CCDC50
0	PSAP
0	TNFRSF1B
0	RAI14
0	KLF6
0	BEX3
0	LRP1
0	IL1RN
0	LIMD2
0	VCAN
0	PLK2
0	TUBA1C
0	BCL11B
0	HBB
0	STAB1
0	TNFAIP3
0	BOC
0	PLEK
0	NR4A3
0	ARHGAP29
0	CCL19
0	ARL4A
0	POSTN
0	GEM
0	COL1A1
0	PLPP1
0	FKBP9
0	CSF1
0	BST2
0	TFPI
0	NUPR1
0	EIF4A3
0	GAS1
0	DUSP2
0	ROBO1
0	MGP
0	DSP
0	GCLC
0	HIST1H4C
0	PTAFR
0	CCL3L1
0	IFI27
0	JDP2
0	ALOX5
0	BCL2A1
0	CH25H
0	LUM
0	HDC
0	HS3ST1
0	AREG
0	SYNE2
0	TWISTNB
0	NOTCH3
0	DKK3
0	PLIN2
0	GAPT
0	APOE
0	ATF5
0	SPTBN1
0	NTM
0	CD68
0	ZNF331
0	SPN
0	PTGS2
0	VEGFA
0	ID4
0	HYAL2
0	PMEPA1
0	CORO1A
0	AC020656.1
0	C1QC
0	KLRB1
0	RGS10
0	FTL
0	IL1R1
0	WLS
0	ADAM8
0	MEG3
0	NFKBIA
0	S100A13
0	COL3A1
0	HCST
0	CREM
0	CXCL9
0	RAPGEF5
0	LCP1
0	FN1
0	FAM30A
0	ITGB2
0	STK17B
0	COL5A1
0	MFGE8
0	ZNF503
0	CSRP2
0	KRT14
0	CCL2
0	CST7
0	GBP2
0	RHEX
0	THBD
0	ADAMDEC1
0	LGMN
0	TUBB2A
0	AIF1
0	ALDH1A1
0	CXCL10
0	MYC
0	SH3PXD2A
0	LST1
0	FCER1A
0	TBC1D4
0	SMC4
0	SPON2
0	PLXDC1
0	ECM1
0	PDGFA
0	PLVAP
0	ATF3
0	EMP1
0	TNFRSF9
0	SLC8A1
0	COL15A1
0	ID1
0	IL7R
0	EPAS1
0	GLIPR2
0	IER5
0	MRC1
0	G0S2
0	NFIB
0	TMPO
0	ARL5B
0	OLR1
0	PRSS23
0	PEA15
0	MPEG1
0	COL5A2
0	STEAP4
0	EGFL6
0	PAWR
0	C1QB
0	JPT1
0	FABP5
0	VCAM1
0	MSX1
0	RGS2
0	FYB1
0	TENT5A
0	C1R
0	FBLN2
0	FGL2
0	COL1A2
0	MAP3K20
0	KRT5
0	MNDA
0	PPP1R15B
0	TCF4
0	MAFB
0	CSF2RA
0	CXCL13
0	CXCL14
0	COL6A3
0	MS4A7
0	FAM20C
0	TGFBR2
0	CD8A
0	HBEGF
0	H2AFZ
0	S100A8
0	HLA-DPA1
0	BCL11A
0	S100A16
0	HLA-DQB1
0	GPR65
0	CSTA
0	CCL4
0	CIITA
0	COL12A1
0	HTRA1
0	SRGN
0	NINJ1
0	SFN
0	MMP9
0	PRRX1
1	KRT14
1	FDCSP
1	KRT5
1	CXCL14
1	S100A2
1	DST
1	COL17A1
1	SFN
1	KRT19
1	PERP
1	LAMB3
1	FXYD3
1	DSP
1	CBR1
1	RND3
1	PAPPA
1	HOPX
1	MYC
1	CTNNAL1
1	MT2A
1	ID1
1	GEM
1	DAPL1
1	TSC22D1
1	SERPINE2
1	IGFBP5
1	CCL2
1	IGFBP2
1	PTN
1	IFI27
1	CACNB4
1	C12orf75
1	S100A16
1	CD9
1	GCLC
1	JAG1
1	IFITM3
1	CAV1
1	SFRP1
1	NCOA7
1	CAV2
1	AQP3
1	EMP2
1	THSD4
1	NFIX
1	MT1E
1	LY6E
1	TUBA1C
1	SLC1A3
1	GJA1
1	SLC7A1
1	ST5
1	SYNE2
1	SLC16A1
1	SH3PXD2A
1	ZBED2
1	KRT8
1	THBS1
1	KRTCAP3
1	SVIL
1	PDLIM4
1	LYPD3
1	GPR68
1	PTHLH
1	PTPRF
1	SPINK2
1	NFIB
1	WEE1
1	TNC
1	SNCA
1	PHLDA1
1	MAFB
1	PTPN13
1	MDFI
1	TNFRSF21
1	TPBG
1	MEG3
1	ARRDC4
1	SAA1
1	AFAP1L2
1	SULF1
1	CSRP2
1	PLEK2
1	GLI3
1	TUSC3
1	TNNT1
1	TEAD1
1	PTK7
1	SERINC2
1	IRX3
1	PDPN
1	SOX6
1	NOTCH3
1	CD3G
1	SPARCL1
1	GNG11
1	CYBA
1	SLC2A3
1	SRGN
1	VIM
1	RNF152
1	BOC
1	ETS2
1	DDR1
1	RAB7B
1	APP
1	EGFR
1	NRG1
1	NRP2
1	RORB
1	ENO1
1	LIMA1
1	ACTN1
1	CTDSPL
1	SLC6A6
1	TNFRSF12A
1	LGALS3BP
1	GAPDH
1	MIR99AHG
1	COL7A1
1	SLC12A2
1	TNFSF10
1	COL14A1
1	MPZL2
1	PAWR
1	ZEB2
1	MMP2
1	PDLIM1
1	HSPB1
1	TMSB4X
1	NTRK2
1	RAPGEF5
1	AHNAK2
1	MIAT
1	KLF5
1	CAVIN1
1	CEBPD
1	MATN2
1	COL6A1
1	RGS5
1	FBXO2
1	HSPA2
1	ARHGAP29
1	NFIC
1	ITGA6
1	PKM
1	ID3
1	CXCL1
1	KRT18
1	KIAA1217
1	CNN3
1	IGKC
1	CCL19
1	IL20RB
1	VWF
1	TUBB4B
1	PMAIP1
1	SPARC
1	ITGA2
1	FTL
1	MT1X
1	PLIN2
1	C1R
1	DKK3
1	PHLDA3
1	LDLR
1	PPP1R14B
1	SELE
1	CXCL3
1	STK17B
1	CSF1R
1	YBX3
1	NNMT
1	ARHGDIB
1	PTMS
1	ITGB4
1	KLRB1
1	TIMP3
1	TUBB2A
1	JPT1
1	IGFBP7
1	S100A10
1	FN1
1	MS4A7
1	NRP1
1	ACTG1
1	GZMB
1	EHF
1	CTSH
1	CLEC10A
1	GAS1
1	BANK1
1	PTPRC
1	ACKR1
1	FCN1
1	GUCY1A1
1	PLPP3
1	NFIA
1	JDP2
1	KLF2
1	GNG12
1	EPAS1
1	STMN1
1	C19orf33
1	NBL1
1	S100A4
1	TACSTD2
1	JUP
1	EGR1
1	FSCN1
1	WLS
1	CTSS
1	C15orf48
1	ANKRD28
1	FSTL1
1	EREG
1	DEK
1	ITGB8
1	HES4
1	LAPTM4B
1	PRSS23
1	GSTP1
1	CD8A
1	STON2
1	GPC1
1	DSC2
1	TAGLN
1	TNFAIP6
1	CAVIN2
1	CXCL12
1	MAF
1	FHL2
1	JAG2
1	KLF4
1	IFI30
1	H1FX
1	GJB2
1	DAB2
1	IL18
1	GZMA
1	TWIST1
1	LBH
1	THY1
1	CCL3L1
1	CXCL8
1	IGLC2
1	S100A8
1	CPE
1	COL5A2
1	SSR4
1	ARL4A
1	SLC3A2
1	MS4A2
1	SPIB
1	CTTN
1	CDH11
1	RGS2
1	HCST
1	CD3D
1	MFAP4
1	FAM107B
1	LGALS2
1	GZMK
1	RAMP2
1	PHGDH
1	GPSM2
1	AL157895.1
1	TCIM
1	RGS1
1	LGALS1
1	CD37
1	MGP
1	DLK2
1	GNLY
1	RGS13
1	HLA-DMB
1	TMSB10
1	PCNA
1	NAAA
1	F2R
1	LIMD2
1	GPNMB
1	CD48
1	NET1
1	SERPINB1
1	CFD
1	ELK3
1	LCK
1	CIITA
1	TRBC2
1	CALCRL
1	HERPUD1
1	RAB32
1	CTSC
1	FMOD
1	PLK2
1	CD69
1	AKR1C1
1	IL1RN
1	TGFBI
1	MS4A6A
1	VWA5A
1	IMPA2
1	ARL4D
1	CD55
1	DIO2
1	TIMP2
1	GLIPR2
1	CCL3
1	SELL
1	CD2
1	HPGD
1	CCDC3
1	MXD1
1	LCP1
1	PRXL2A
1	ATF3
1	CSF1
1	CD96
1	LYN
1	CALD1
1	SDC1
1	POU3F1
1	COTL1
1	HLA-DPA1
1	TRAC
1	BCL2A1
1	PRRG4
1	C1QA
1	NR2F2
1	CD3E
1	RGCC
1	CXCL13
1	KLF9
1	CD86
1	SERPINB9
1	ADCYAP1
1	RASSF4
1	ARRDC3
1	FILIP1L
1	LILRB2
1	RHEX
1	STAB1
1	STOM
1	FKBP10
1	C11orf96
1	WNT10A
1	RRAD
1	COL4A2
1	CLU
1	HSP90B1
1	PTGDS
1	SH3BP5
1	CKB
1	PCOLCE
1	HBEGF
1	PLA2R1
1	COL6A3
1	LGALS3
1	PTGER4
1	DERL3
1	CXCL2
1	GIMAP7
1	IL4I1
1	CREM
1	CD27
1	SERPINA1
1	NOP16
1	DLC1
1	SH3BGRL3
1	ANXA1
1	AEBP1
1	IGHG2
1	KLF6
1	LTB
1	CCL4L2
1	COL3A1
1	VCAM1
1	AOAH
1	LAT2
1	MTUS1
1	ARRB2
1	TNF
1	BIRC3
1	ITM2C
1	CD14
1	ADAM8
1	GRASP
1	PLEK
1	MEF2C
1	XBP1
1	SERPINF1
1	SLC7A5
1	MRC1
1	PRCP
1	ITGAX
1	POSTN
1	AP1S2
1	C1S
1	POU2F2
1	VCAN
1	GLRX
1	SOX7
1	LAPTM5
1	HCLS1
1	NTM
1	FAM30A
1	IER5
1	CD52
1	ACTB
1	PTPRE
1	TNFSF13B
1	CTNNBIP1
1	ADAMDEC1
1	EVI2B
1	COL4A1
1	CYTIP
1	ABLIM1
1	FCGR2A
1	TRBC1
1	CD53
1	POU2AF1
1	FBLN2
1	HBA2
1	CRISPLD2
1	SLC18A2
1	FYB1
1	IL1RL1
1	RNASE1
1	NFKBIA
1	EMILIN1
1	SFRP2
1	FGL2
1	CTSG
1	FCGR2B
1	IFITM2
1	MMP9
1	HLA-DPB1
1	IGFBP6
1	TNFAIP3
1	PPP1R15B
1	EGFL6
1	IGSF6
1	AQP1
1	NABP1
1	TGFBR2
1	IL1B
1	TP73
1	PRDM1
1	JAML
1	CD300E
1	IL7R
1	METRNL
1	LUM
1	MZB1
1	RGS10
1	LCP2
1	NFKBIZ
1	LSP1
1	C1orf162
1	CD74
1	APCDD1
1	ICAM3
1	KIT
1	MS4A1
1	TPSAB1
1	PTGS2
1	OLFML2B
1	FBN1
1	NKG7
1	EBF1
1	SLC16A3
1	IL32
1	AIF1
1	CST7
1	GPR183
1	GAPT
1	PSAP
1	OLR1
1	ISG15
1	PHACTR1
1	CORO1A
1	CD4
1	LTC4S
1	FCRL5
1	KDM6B
1	ENG
1	SEC11C
1	CD83
1	IGFBP4
1	RHOBTB3
1	THEMIS2
1	APOC1
1	ITM2A
1	EFHD2
1	CPXM1
1	C1QC
1	TNFRSF13B
1	COL1A1
1	COL1A2
1	MNDA
1	LAIR1
1	TPM3
1	IGF1
1	TENT5A
1	PLXND1
1	LAT
1	HLA-DQA1
1	EGFL7
1	APOE
1	PRKG1
1	EMILIN2
1	SELENOM
1	CDH13
1	CST3
1	NR4A2
1	LY86
1	CD93
1	SOD3
1	CD79A
1	PIM2
1	VEGFA
1	CXCR4
1	BCAM
1	FCER1A
1	SGK1
1	SERPING1
1	EFNA1
1	F13A1
1	IKZF1
1	NID1
1	SAMSN1
1	CCL5
1	ISG20
1	NCKAP1L
1	TPSB2
1	PTGR1
1	MYL9
1	TMEM176A
1	TAGAP
1	CXorf21
1	ICAM1
1	CTSK
1	LDLRAD4
1	GPR65
1	HSPA5
1	CPA3
1	KRT1
1	IRF8
1	FRZB
1	PRDX4
1	UCP2
1	NR4A3
1	ITGB2
1	ETS1
1	HLA-DRB1
1	SOCS1
1	RGS16
1	IGHG3
1	CYTOR
1	ARL4C
1	PPP1R15A
1	COL15A1
1	AHR
1	IGHG1
1	TENT5C
1	CSF2RA
1	ALDH1A1
1	CARMN
1	SPI1
1	LGMN
1	PLEKHO1
1	IKZF3
1	GPRIN3
1	JCHAIN
1	MX2
1	C1QB
1	CKLF
1	IQGAP2
1	ZNF331
1	ZEB1
1	DUSP4
1	DDIT4
1	VAMP5
1	IGLC3
1	FCER1G
1	GLIPR1
1	AC020656.1
1	RGS3
1	PLVAP
1	PFN1
1	LHFPL6
1	LAMA4
1	SLC2A1
1	TUBA1A
1	FKBP11
1	GADD45A
1	PLAUR
1	FJX1
1	TMEM176B
1	TNFRSF1B
1	TNFRSF13C
1	TFPI
1	CYBB
1	PTP4A3
1	CPVL
1	CAPG
1	GPSM3
1	CTSD
1	TYROBP
1	HBB
1	C1orf54
1	PMP22
1	IGHG4
1	UBD
1	WAS
1	LGALS9
1	FTH1
1	ATF5
1	AREG
1	RNASE6
1	CALU
1	CTSZ
1	CLEC11A
1	CD84
1	REL
1	IGHA1
1	HLA-DQB1
1	C5AR1
1	ADA2
1	SLAMF7
1	A2M
1	KRT17
1	AC004687.1
1	NCF1
2	TPSB2
2	CPA3
2	HPGD
2	TPSAB1
2	HPGDS
2	MS4A2
2	SLC18A2
2	GATA2
2	RHEX
2	HDC
2	CLU
2	LTC4S
2	VWA5A
2	CD69
2	ANXA1
2	KIT
2	IL1RL1
2	S100A4
2	CTSD
2	FCER1G
2	CAPG
2	RGS13
2	ALDH1A1
2	AL157895.1
2	SAMSN1
2	BTK
2	ALOX5AP
2	LGALS3
2	CD9
2	FTH1
2	SRGN
2	S100A6
2	VIM
2	SH3BGRL3
2	FTL
2	TNFRSF13B
2	KYNU
2	SAMHD1
2	SFRP2
2	CYTIP
2	MS4A1
2	CCL5
2	HLA-DQB1
2	CD74
2	CD40
2	RAC2
2	SLAMF7
2	PRDM1
2	CD3D
2	MEF2C
2	ISG20
2	ADAMDEC1
2	MS4A6A
2	MAFB
2	TIMP1
2	TRAC
2	HLA-DMA
2	THEMIS2
2	NTM
2	ANXA2
2	AOAH
2	CKLF
2	MAOB
2	HLA-DQA1
2	NNMT
2	LILRB1
2	TNFSF10
2	SELENOM
2	NFKBIA
2	TNFAIP2
2	TENT5C
2	SH3BP5
2	ARHGDIB
2	SOCS1
2	IRF8
2	OLR1
2	THY1
2	MARCKS
2	IGFBP4
2	SLC45A3
2	GZMK
2	CD24
2	TCF4
2	IGFBP7
2	HLA-DRA
2	HLA-DPB1
2	AC058791.1
2	FYB1
2	FCGR2B
2	GLIPR1
2	MLPH
2	LTB
2	CSF1
2	COL6A3
2	CHN1
2	GADD45B
2	CSF2RA
2	SPARC
2	ADCYAP1
2	GBP2
2	CCL19
2	TRBC1
2	RGS10
2	POU2AF1
2	IL7R
2	GZMA
2	MMP14
2	CYBB
2	SELENOP
2	TENT5A
2	TYMP
2	PLEKHO1
2	CXCR4
2	PCOLCE
2	COL1A1
2	TRBC2
2	CTSK
2	CTHRC1
2	ALOX5
2	RARRES2
2	LAT
2	FMOD
2	DUSP4
2	IGF1
2	IGHG2
2	CEBPD
2	RNASE6
2	RND3
2	OTUD1
2	FSTL1
2	TYROBP
2	CCL3
2	CD37
2	RGS1
2	ANTXR1
2	SPIB
2	C1QB
2	COL6A2
2	RORB
2	FKBP11
2	ADRB2
2	TIMP3
2	UACA
2	PEA15
2	LYZ
2	DERL3
2	ACTA2
2	COL14A1
2	DDIT4
2	COL4A2
2	BHLHE41
2	CTSS
2	CXCL13
2	COL6A1
2	MEG3
2	KRT1
2	MFGE8
2	CD79A
2	KLRB1
2	PLXDC1
2	COL1A2
2	CD3E
2	CFD
2	TNFSF13B
2	CALD1
2	FCN1
2	IER2
2	AEBP1
2	G0S2
2	PLIN2
2	PPIF
2	ETS1
2	JAM2
2	MFAP4
2	CD27
2	MGP
2	COL5A1
2	HLA-DRB1
2	GPR65
2	ITM2C
2	LCK
2	GLUL
2	FOXP1
2	TNFRSF13C
2	SERPINB1
2	TSHZ2
2	ENG
2	IL10RA
2	ACTN1
2	AIF1
2	PDLIM1
2	PPP1R15A
2	DCN
2	SERPINF1
2	KCTD12
2	CCL4L2
2	F2R
2	SYNE2
2	CLEC10A
2	HLA-DMB
2	ADAM28
2	LST1
2	MMP19
2	ADA2
2	OLFML2B
2	PRSS23
2	CD4
2	LAMB1
2	CCL3L1
2	CPVL
2	HNMT
2	IRF7
2	IGFBP5
2	IGFBP2
2	CRISPLD2
2	BCL6
2	SLC1A3
2	FKBP10
2	DNAAF1
2	PIM2
2	FCRL5
2	EBF1
2	CIITA
2	IGHG1
2	TFPI
2	MMP2
2	LHFPL6
2	SOD2
2	FILIP1L
2	COL4A1
2	DUSP5
2	CAVIN3
2	C15orf48
2	PLPP3
2	RNASE1
2	THBD
2	IFI27
2	FDCSP
2	CSGALNACT1
2	APP
2	SERPINA1
2	RAB31
2	ZFP36L1
2	ACOT7
2	SOX4
2	CCL2
2	PERP
2	LIMA1
2	RAB32
2	KLF6
2	CXCL3
2	CNN3
2	IFITM2
2	HS3ST1
2	IGHG4
2	F13A1
2	PDK1
2	CXCL14
2	TIMP2
2	ATP2B1-AS1
2	MYC
2	CTSZ
2	ITGB2
2	PFKFB3
2	ITGB5
2	IL1RN
2	CD14
2	JAML
2	CXCL12
2	CCN1
2	HBEGF
2	TUBA1A
2	IGHG3
2	LMNA
2	CCL4
2	LRP1
2	POU2F2
2	LAMA4
2	GPRIN3
2	TNFAIP6
2	ADIRF
2	CD3G
2	HSPA5
2	ADCY4
2	RGCC
2	MARCKSL1
2	IL32
2	DAB2
2	COL16A1
2	CFH
2	JCHAIN
2	TSPAN13
2	NFKBIZ
2	CCDC50
2	CXCL10
2	IER5L
2	DAPP1
2	FLNA
2	BCL11A
2	PTN
2	CD248
2	PLAC8
2	CLEC11A
2	TNFRSF1B
2	GCSAML
2	POSTN
2	CD8A
2	CD93
2	CD2
2	CD52
2	KRT14
2	TRIB1
2	KRT5
2	CLEC7A
2	C1QA
2	FSCN1
2	AC020656.1
2	MZB1
2	EGFL6
2	IL1B
2	PRRX1
2	C1S
2	CXCL1
2	MXD1
2	TM4SF1
2	HLA-DPA1
2	S100A16
2	LY86
2	EDNRA
2	SOD3
2	LUM
2	MS4A7
2	PPA1
2	IFNGR1
2	SLC8A1
2	TOR3A
2	EFEMP2
2	KLF4
2	PLAT
2	SGK1
2	FAM114A1
2	RHOBTB3
2	TAGAP
2	CDKN1A
2	PLAUR
2	CAVIN2
2	IQGAP2
2	ENTPD1
2	TNFAIP3
2	CPNE3
2	CTSL
2	S100A11
2	SELL
2	IGLC3
2	RASSF4
2	COL5A2
2	PMEPA1
2	CTTNBP2
2	PAPPA
2	GLRX
2	GIMAP7
2	CXCL2
2	EMP1
2	S100A2
2	BIRC3
2	CEBPB
2	ITM2A
2	GIMAP4
2	GBP1
2	TGFBI
2	HOPX
2	MIAT
2	DSP
2	NR2F2
2	TAGLN
2	MXRA8
2	NBL1
2	UBD
2	VCAN
2	GZMB
2	SLC2A3
2	CALB2
2	RAB30
2	LILRB2
2	NLRP3
2	DST
2	CAV2
2	CCND1
2	DKK3
2	CLNK
2	COL3A1
2	PECAM1
2	RAB13
2	MYLK
2	ARRDC3
2	TFRC
2	LAT2
2	PTGER4
2	SLC2A6
2	JAG1
2	CYTOR
2	CRIP2
2	STMN1
2	C12orf75
2	PRDX4
2	JDP2
2	CORO1A
2	MPEG1
2	ARL4C
2	CTSH
2	CDH11
2	MRC1
2	TSC22D1
2	TNFRSF9
2	HTRA1
2	LGMN
2	S100A8
2	VWA1
2	CTNNAL1
2	TWIST1
2	CXCL8
2	RGS2
2	FBN1
2	AREG
2	CTTN
2	PXDN
2	KLF9
2	GEM
2	LIF
2	SPARCL1
2	PLEK
2	PTGDS
2	ID1
2	IER5
2	BST2
2	KLF2
2	CAV1
2	S100A13
2	ID4
2	ID3
2	ALDH2
2	IFI30
2	LAMB3
2	SFN
2	SLC20A1
2	PTPRE
2	GNLY
2	NRP1
2	YWHAH
2	STOM
2	ANKRD28
2	FBP1
2	LAPTM5
2	IL4I1
2	GPNMB
2	EREG
2	C1orf54
2	LGALS3BP
2	ZEB1
2	WWTR1
2	TPSD1
2	TPM2
2	NSMCE1
2	WNT5A
2	DUSP6
2	HBB
2	MDK
2	MXRA5
2	ZEB2
2	NCOA7
2	CEMIP2
2	AKAP12
2	RHOB
2	C1R
2	SPOCK2
2	ATF5
2	MMP9
2	WLS
2	LGALS2
2	NAMPT
2	CPXM1
2	CXCL9
2	PPFIBP1
2	CSRP2
2	ITGA6
2	DNAJB1
2	XBP1
2	C1orf162
2	APOC1
2	EMP2
2	CCDC80
2	PLK2
2	H2AFY
2	HCST
2	NR4A2
2	PMAIP1
2	SERPING1
2	CD96
2	SPON2
2	ZNF331
2	EGFR
2	MYL9
2	CITED2
2	NFIB
2	CTSG
2	IGKC
2	FBLN2
2	LY6E
2	SEC11C
2	FOSL2
2	PAWR
2	TAGLN2
2	GADD45A
2	ST5
2	UGCG
2	ATF3
2	ETS2
2	ECE1
2	COL17A1
2	ACTG1
2	BGN
2	LAMB2
2	CYBA
2	PTP4A3
2	S100A9
2	DIO2
2	IGHA1
2	SORL1
2	SVIL
2	LAMC1
2	PDGFRB
2	HBA2
2	TNS2
2	SSPN
2	NRP2
2	EHD2
2	ASPH
2	AP1S2
2	BANK1
2	C1QC
2	RCN1
2	LITAF
2	KIAA1217
2	RAMP2
2	RGS16
2	IL1R1
2	GJA1
2	IL18
2	ID2
2	NFIC
2	RRAD
2	FRZB
2	SERPINH1
2	CD86
2	YBX3
2	HSP90B1
2	MNDA
2	REL
2	FRMD6
2	LBH
2	RAB11FIP1
2	C11orf96
2	TUBA4A
2	CREM
2	PHLDA1
2	PRRX2
2	SDC1
2	IGSF6
2	IGLC2
2	TCIM
2	LSP1
2	CSF1R
2	METRNL
2	NTRK1
2	ABLIM1
2	COL12A1
2	LXN
2	LMNB1
2	FAM107B
2	PLVAP
2	NKG7
2	PTGS1
2	PTGS2
2	CST7
2	CH25H
2	PRCP
2	SPTBN1
2	APOE
2	MT1E
2	BOC
2	GAS1
2	CLEC12A
2	CD84
2	VWF
2	TMEM176B
2	MAF
2	SPATS2L
2	ADAMTS1
2	FBLN1
2	DSE
2	CBR1
2	HECW2-AS1
2	C5AR1
2	GNG11
2	LRMDA
2	PTMS
2	SPRY1
2	HSPG2
2	PPP1R15B
2	CCDC102B
2	FABP5
2	STK17B
2	SSR4
2	CTSB
2	AC020916.1
2	CPE
2	PMP22
2	GPR183
2	MAP1B
2	FXYD3
2	GNG12
2	CALCRL
2	ENAH
2	RSAD2
2	TBX3
2	CD300E
2	GGT5
2	DUSP2
2	DLC1
2	NFATC1
2	HSPB1
2	A2M
2	DNASE1L3
2	PPIC
2	C3AR1
2	AQP1
2	PHLDA2
2	ATP1B1
2	PLTP
2	HES4
2	CCN2
2	ARHGAP29
2	EMILIN2
2	HERPUD1
2	SELE
2	KCNQ1OT1
2	UBE2S
2	MT2A
2	PSAP
2	MATK
2	NOTCH3
2	DSC2
2	GUCY1A1
2	HAVCR2
2	CSTA
2	NUPR1
2	GAPT
2	APCDD1
2	FHL1
[truncated: 8,892 more rows]

## Sheet: Stromal re-clustering
gene	p_val	avg_logFC	pct.1	pct.2	p_val_adj	cluster
LGALS3	4.66572e-50	0,583865129506613	1	0,94	9.33144e-47	0
STEAP1	7.83133e-43	0,502804215506763	0,96	0,888	1.56627e-39	0
UBD	9.458e-38	0,495436877831135	0,948	0,887	1.8916e-34	0
CSGALNACT1	8.69843e-37	0,501145340548684	0,943	0,853	1.73969e-34	0
CTSH	2.55141e-35	0,498618814235672	0,983	0,927	5.10282e-32	0
LUM	7.17306e-35	0,592166406353764	1	0,977	1.43461e-31	0
COL6A3	1.23948e-33	0,508270870558857	1	0,981	2.47896e-30	0
C1S	1.77347e-32	0,471351735357163	1	0,979	3.54693e-29	0
FBLN2	4.56535e-33	0,476494600933592	0,998	0,959	9.13071e-30	0
COL3A1	1.88919e-31	0,498455874539264	1	0,994	3.77838e-28	0
SFRP2	2.94941e-31	0,531764254742011	0,975	0,922	5.89882e-29	0
TMEM176A	3.09979e-31	0,464732808363857	0,998	0,935	6.19957e-28	0
CXCL13	1.46258e-30	0,79619243710913	0,965	0,938	2.92517e-27	0
IFNGR1	1.7495e-30	0,483380882710829	0,99	0,93	3.49901e-27	0
CYP7B1	4.09088e-30	0,407500778035411	0,935	0,585	8.18176e-27	0
DCN	8.13653e-29	0,537618801043672	1	0,983	1.62731e-25	0
CTSK	1.01e-28	0,488618925874419	1	0,958	2.02e-25	0
BPGM	5.71152e-28	0,324830278209208	0,876	0,564	1.1423e-24	0
VIM	2.25111e-27	0,349815687396458	1	0,997	4.50222e-24	0
PPIC	4.01729e-27	0,403649771675476	0,975	0,873	8.03457e-24	0
RGS3	4.94208e-27	0,504221477699904	0,97	0,824	9.88415e-24	0
TMEM176B	6.65305e-27	0,460528113069718	0,99	0,948	1.33061e-23	0
FTH1	9.77872e-27	0,29870050461223	1	0,991	1.95574e-23	0
CXCL12	1.89346e-26	0,551803176938994	0,998	0,967	3.78693e-23	0
FRMD6	1.00397e-25	0,396102009082969	0,973	0,904	2.00794e-22	0
CH25H	1.33613e-25	0,524099662500177	0,906	0,88	2.67225e-22	0
APCDD1	1.66439e-25	0,467138458641771	1	0,897	3.32877e-22	0
SOD2	3.36935e-25	0,488983175111541	0,975	0,89	6.7387e-22	0
CPXM1	7.26651e-26	0,381257953133246	0,993	0,936	1.4533e-21	0
IGF1	7.47246e-25	0,360617711554436	0,898	0,812	1.49449e-21	0
S100A10	2.44556e-23	0,517462087668692	1	0,932	4.89111e-20	0
TWIST1	5.25377e-23	0,448273175521009	0,993	0,938	1.05075e-19	0
CXCL2	1.0909e-22	0,422646045561893	0,893	0,852	2.18179e-19	0
PRSS23	1.21726e-22	0,362860701773071	0,998	0,96	2.43452e-19	0
CTHRC1	1.29772e-22	0,449214540815523	0,973	0,933	2.59544e-19	0
COL6A2	1.35396e-22	0,339638120917181	1	0,994	2.70791e-19	0
THY1	1.72721e-22	0,379996677249376	1	0,978	3.45441e-19	0
PLXDC2	4.44659e-22	0,320769556910714	0,871	0,664	8.89317e-19	0
ENPP2	8.58918e-22	0,32895768435146	0,844	0,774	1.71784e-18	0
FBN1	9.29233e-23	0,437066960481391	0,993	0,938	1.85847e-18	0
COL6A1	1.04568e-21	0,390003415868915	1	0,991	2.09135e-18	0
FGFR1	3.00766e-21	0,333765318499982	0,96	0,699	6.01532e-18	0
CERCAM	3.44431e-21	0,299219142005965	0,965	0,917	6.88863e-18	0
IL1R1	3.4781e-21	0,314307372829478	0,953	0,631	6.95621e-18	0
PTGDS	3.57722e-21	0,409581726117373	0,973	0,944	7.15444e-18	0
HAS2	3.65697e-21	0,364107144488334	0,913	0,847	7.31394e-18	0
IL34	7.05687e-21	0,307228307401934	0,943	0,861	1.41137e-17	0
RORB	9.24207e-21	0,360941527989778	0,958	0,85	1.84841e-17	0
VCAN	9.55408e-21	0,381341585152378	0,995	0,96	1.91082e-17	0
SCARA5	1.0708e-20	0,386810572153438	0,779	0,539	2.14159e-17	0
MXRA5	1.15666e-21	0,384927080253534	0,97	0,892	2.31333e-17	0
RARRES2	1.88181e-20	0,431189855789341	0,993	0,911	3.76362e-17	0
RND3	2.46843e-20	0,379900490009183	0,988	0,932	4.93686e-17	0
MMP2	2.50201e-20	0,460790018604329	0,998	0,949	5.00401e-17	0
IL11RA	3.20564e-20	0,292866361229144	0,888	0,75	6.41128e-17	0
PRSS12	3.30027e-20	0,385168288866654	0,918	0,672	6.60054e-17	0
S100A13	5.81014e-20	0,381929405390666	0,995	0,878	1.16203e-16	0
RCN1	7.59484e-20	0,336884421046499	0,985	0,88	1.51897e-16	0
BASP1	7.76359e-20	0,314320315363914	0,978	0,921	1.55272e-16	0
TWIST2	1.09253e-19	0,334519539515222	0,935	0,826	2.18506e-16	0
S100A11	7.04418e-20	0,343878351114354	1	0,917	1.40884e-15	0
VAMP5	1.22855e-19	0,329336367450495	0,96	0,657	2.45709e-17	0
BICC1	2.73243e-18	0,346418607014673	0,916	0,848	5.46486e-15	0
MOXD1	6.01902e-18	0,28855582417098	0,906	0,736	1.2038e-15	0
LY6E	1.06509e-17	0,344604676437994	0,99	0,942	2.13018e-14	0
EMP1	1.37856e-17	0,349651465602189	0,993	0,946	2.75711e-14	0
FMOD	1.5837e-17	0,330432102421152	0,983	0,942	3.16739e-14	0
LAMA2	2.07419e-17	0,250868091272103	0,851	0,799	4.14838e-14	0
DSEL	2.87904e-17	0,298646009618741	0,935	0,671	5.75808e-14	0
CXCL1	3.54679e-17	0,265300743352645	0,849	0,811	7.09357e-14	0
SERPINF1	4.43958e-17	0,353222587969923	1	0,977	8.87915e-14	0
IL32	1.93055e-16	0,365807467342172	0,906	0,842	3.8611e-13	0
S100A6	2.20819e-16	0,34976438580786	1	0,976	4.41637e-13	0
DUSP1	2.78326e-16	0,396762107980315	1	0,982	5.56651e-13	0
LPAR1	6.33263e-16	0,290381460635053	0,903	0,87	1.26653e-12	0
GPNMB	8.87325e-16	0,309504685296997	0,978	0,719	1.77465e-13	0
COL1A2	2.44338e-15	0,283569412046525	1	0,997	4.88676e-12	0
ADAMTS2	4.51279e-16	0,313534730857348	0,94	0,917	9.02558e-13	0
FBLN1	4.69224e-15	0,308023120323298	0,993	0,86	9.38448e-12	0
TBX3	6.68524e-15	0,318238233645857	0,958	0,659	1.33705e-11	0
STEAP2	7.91124e-15	0,282254511595296	0,901	0,854	1.58225e-12	0
TGFB3	8.40174e-15	0,260960856767641	0,861	0,648	1.68035e-11	0
MDK	1.13012e-14	0,358549063435762	0,98	0,925	2.26025e-11	0
MFAP4	2.20409e-14	0,321622976117754	0,968	0,85	4.40818e-11	0
ANXA2	2.53619e-14	0,322926672668272	1	0,948	5.07239e-11	0
CST3	3.81372e-14	0,318886857436536	1	0,991	7.62744e-12	0
SELENOM	4.84015e-14	0,319897039507704	0,998	0,916	9.6803e-11	0
ANK2	6.66385e-14	0,27418271409768	0,831	0,594	1.33277e-10	0
PCSK5	1.16227e-13	0,312446751066053	0,871	0,866	2.32454e-10	0
ANGPTL2	1.2388e-14	0,261996043221568	0,883	0,855	2.4776e-10	0
ARRDC3	1.75856e-13	0,339832108447936	0,948	0,807	3.51712e-10	0
WNT5A	2.16043e-13	0,287669376571	0,965	0,919	4.32087e-10	0
NFKBIA	4.35221e-13	0,392141710831438	0,973	0,812	8.70441e-10	0
DIO2	4.67261e-13	0,391582097282121	0,96	0,898	9.34522e-10	0
DPT	8.93567e-13	0,262420985865857	0,921	0,888	1.78713e-09	0
DAB2	9.58302e-13	0,265970988402017	0,96	0,863	1.9166e-09	0
LGALS1	1.06138e-13	0,271797773915778	0,998	0,969	2.12277e-09	0
OLFML3	2.28047e-12	0,26999787054982	0,945	0,861	4.56094e-09	0
GAPDH	2.6096e-12	0,271231436623066	0,995	0,953	5.2192e-09	0
CTSL	4.2973e-12	0,28568054379361	0,933	0,637	8.5946e-09	0
TNFAIP6	6.00574e-12	0,432839041636533	0,856	0,867	1.20115e-08	0
CCL2	6.22329e-12	0,303656406723373	0,878	0,701	1.24466e-09	0
TSHZ2	6.39146e-13	0,287624688497689	0,824	0,707	1.27829e-09	0
RAB13	1.16671e-13	0,302646160316701	0,983	0,824	2.33342e-08	0
OLFM2	2.14136e-11	0,340030418113229	0,868	0,756	4.28272e-08	0
OLFML2B	4.03988e-11	0,29345583179705	0,98	0,925	8.07976e-08	0
GPX8	4.58883e-11	0,25421436804879	0,926	0,853	9.17765e-08	0
HNMT	6.47485e-11	0,255796347697824	0,883	0,788	1.29497e-07	0
CRABP2	8.51077e-11	0,280534454226872	0,893	0,877	1.70215e-07	0
LSAMP	8.60141e-12	0,250561724115135	0,826	0,825	1.72028e-07	0
CTSB	1.31287e-10	0,300506445151356	0,988	0,871	2.62574e-07	0
CCDC80	2.29456e-10	0,35176112022155	0,99	0,943	4.58912e-07	0
TYMP	3.02318e-10	0,266494575951105	0,993	0,956	6.04636e-07	0
S100A16	3.09097e-10	0,284352004720892	0,866	0,855	6.18193e-07	0
SH3BP5	7.56681e-10	0,271132729785988	0,903	0,89	1.51336e-06	0
C1R	9.44139e-10	0,330383139629211	1	0,986	1.88828e-06	0
PDGFRA	1.189e-09	0,308237095730947	0,911	0,839	2.37801e-06	0
CXCL14	1.33019e-09	0,282516149048451	0,918	0,725	2.66038e-06	0
COL5A2	4.9614e-09	0,2708168494703	1	0,978	9.9228e-06	0
CCL19	5.9576e-10	0,587379279036259	0,844	0,816	1.19152e-05	0
SPON2	1.21773e-08	0,299011336198513	0,921	0,869	2.43546e-06	0
DUT	1.75832e-09	0,258003704588831	0,945	0,745	3.51663e-05	0
CYP1B1	3.07333e-08	0,294383219789841	0,806	0,796	6.14666e-05	0
ABI3BP	5.35777e-08	0,294593677274158	0,792	0,701	0.000107155	0
SERPINE1	5.90132e-08	0,419262462662513	0,846	0,857	0.000118026	0
TIMP1	3.86584e-07	0,323179211594517	0,998	0,925	0.000773169	0
MARCKS	4.10065e-07	0,279520849591285	0,998	0,954	0.000820129	0
APP	1.10318e-06	0,286104470366773	0,995	0,837	0.00220636	0
PRRX2	1.35521e-06	0,259564420458776	0,985	0,906	0.00271043	0
PCOLCE	3.50492e-06	0,267506194031911	1	0,99	0.00700985	0
NNMT	5.71522e-06	0,314825714556601	0,998	0,933	0.0114304	0
KLF4	6.90085e-05	0,257157983141704	0,876	0,883	0.138017	0
GEM	6.96993e-05	0,270149396966292	0,965	0,903	0.139399	0
JUN	9.49478e-05	0,353577082024473	0,998	0,948	0.189896	0
GAS1	0.000244762	0,255444715937418	0,883	0,844	0.489524	0
EPHX1	0.000288616	0,26716575499754	0,98	0,849	0.577232	0
ANXA1	6.67792e-05	0,30388279307208	0,99	0,906	0.133558	0
OMD	6.82607e-05	0,25010087268409	0,829	0,856	1.36521	0
CRABP1	0.00103532	0,470750494797749	0,774	0,798	2.07064	0
GADD45A	0.000662713	0,308445280262013	0,883	0,797	13.2543	0
CD24	0.0235353	0,330199863434771	0,782	0,793	47.0706	0
GREM1	0.00257006	0,252346959883346	0,779	0,802	5.14011	0
APOE	0.0474206	0,326830129078234	0,97	0,938	9.48413	0
EGFL6	0.0598042	0,294260788406692	0,948	0,896	119.608	0
CFD	39.9275	0,287152561176671	0,787	0,763	79855	0
SERPINE2	300.71	0,271600000971103	0,667	0,642	601419	0
CCN1	65463.3	0,38632149386966	0,831	0,744	1.30927e+08	0
CCN2	1.07875e+06	0,309659053018734	0,653	0,54	0,00021575016826572	0
PTGS2	3.90696e+08	0,334167734422928	0,63	0,717	0,00781392506295925	0
POSTN	0,000205902410788334	0,30294463412254	0,806	0,858	0,411804821576668	0
SPARCL1	9.47566e-122	190887228607068	0,984	0,313	1.89513e-118	1
TAGLN	1.89522e-105	195909658040225	0,948	0,454	3.79044e-102	1
PDGFB	1.0019e-93	0,272735532350364	0,826	0,159	2.0038e-90	1
A2M	6.00879e-90	146952669615521	0,935	0,316	1.20176e-86	1
KRT18	1.46233e-89	0,450162559624225	0,9	0,54	2.92466e-86	1
STEAP4	6.27008e-89	10429308594759	0,955	0,21	1.25402e-85	1
SYNPO2	9.40795e-89	112246361082868	0,952	0,537	1.88159e-85	1
MYL9	1.15567e-87	128315570208926	0,961	0,894	2.31134e-84	1
NR2F2	3.56805e-85	126961135062597	0,984	0,88	7.13611e-83	1
INPP4B	9.26481e-85	101094313639723	0,89	0,175	1.85296e-81	1
KRT8	6.60248e-84	0,326943177541744	0,894	0,505	1.3205e-79	1
MYH11	6.82304e-83	129871745081262	0,819	0,12	1.36461e-79	1
RGS5	1.65246e-82	190195405663243	0,91	0,429	3.30491e-80	1
MRVI1	3.79831e-82	105992687786431	0,955	0,608	7.59661e-79	1
ACTA2	1.34688e-81	16271836193199	0,923	0,709	2.69375e-78	1
FAM13C	6.16578e-81	0,847463397589421	0,939	0,414	1.23316e-77	1
LBH	7.76633e-80	130718346754699	0,897	0,399	1.55327e-76	1
HOPX	1.67699e-77	0,999002070088219	0,89	0,259	3.35397e-74	1
CCDC102B	2.25138e-75	0,909447747926576	0,977	0,603	4.50276e-72	1
PAWR	3.65923e-75	110484099869274	0,965	0,637	7.31846e-72	1
ADGRF5	1.83504e-74	0,345192970308915	0,919	0,509	3.67007e-71	1
ARHGDIB	1.84929e-73	0,632814015008253	0,897	0,363	3.69858e-70	1
DOCK6	4.38267e-70	0,262323707190197	0,848	0,268	8.76534e-67	1
FAM162B	1.39643e-69	0,701837445285773	0,916	0,443	2.79286e-66	1
FJX1	1.66878e-67	0,40267185445599	0,903	0,433	3.33756e-64	1
NEURL1B	5.71519e-67	0,710896596395031	0,887	0,481	1.14304e-63	1
TIMP3	8.96761e-68	124837106625162	0,887	0,395	1.79352e-63	1
NOTCH3	2.29816e-65	0,981881852809808	0,926	0,634	4.59632e-62	1
IGFBP7	1.86738e-64	0,802506166523984	0,99	0,989	3.73476e-61	1
BCAM	4.85208e-64	104004065781643	0,8	0,217	9.70417e-61	1
DLX5	1.29205e-62	0,464439956406786	0,855	0,224	2.58411e-59	1
TINAGL1	5.12053e-62	114472890191155	0,874	0,324	1.02411e-58	1
MEF2C	1.72037e-59	109337864846888	0,871	0,349	3.44075e-56	1
HSPA2	6.2066e-58	0,311581991417581	0,826	0,347	1.24132e-53	1
GJC1	7.69149e-56	0,776112463402676	0,932	0,692	1.5383e-52	1
TPM2	9.36427e-56	0,886383653699462	0,929	0,858	1.87285e-52	1
ADAMTS4	2.38565e-55	0,612356744499379	0,932	0,728	4.77129e-52	1
ADIRF	4.49119e-55	0,842581250074409	0,971	0,935	8.98238e-52	1
CALD1	2.41524e-54	0,621878363409672	0,994	0,994	4.83048e-51	1
GPX3	6.70409e-53	0,582741735831889	0,848	0,229	1.34082e-49	1
C1QTNF1	6.84201e-53	108904472649066	0,887	0,561	1.3684e-49	1
ARHGAP29	3.86255e-51	0,959352499809047	0,852	0,358	7.72511e-48	1
TPM1	5.96757e-52	0,928818218457793	0,948	0,917	1.19351e-47	1
ITGA7	2.45148e-49	0,884281326882179	0,813	0,214	4.90295e-46	1
AFAP1L2	6.30341e-49	0,37949720055314	0,839	0,501	1.26068e-45	1
MAP1B	1.52845e-48	0,923415148326442	0,926	0,804	3.0569e-45	1
EDNRA	1.65265e-47	0,963478849705895	0,958	0,723	3.30529e-44	1
CARMN	2.25371e-47	119939506459455	0,903	0,508	4.50741e-44	1
NDRG2	8.56544e-47	0,772573154406784	0,861	0,387	1.71309e-43	1
RNF152	5.24409e-46	0,42853746852365	0,881	0,373	1.04882e-43	1
APOLD1	4.97959e-43	0,264922365262105	0,865	0,425	9.95919e-40	1
DLC1	6.32551e-42	0,843597610596879	0,942	0,601	1.2651e-38	1
NDUFA4L2	9.82216e-42	0,961842925367254	0,823	0,238	1.96443e-38	1
ITGA1	4.33853e-40	0,606354211379803	0,913	0,594	8.67706e-37	1
SNRK	7.25391e-40	0,48642609002509	0,874	0,548	1.45078e-37	1
EPS8	1.0099e-37	104453418278383	0,861	0,649	2.01979e-34	1
TNS2	1.37868e-37	0,600757292615351	0,935	0,701	2.75735e-34	1
CAV1	1.65278e-37	0,709234437810251	0,945	0,833	3.30556e-34	1
AC023157.3	2.11156e-36	0,312916485784126	0,768	0,42	4.22313e-33	1
IGHG4	8.75214e-36	0,258030278980443	0,897	0,583	1.75043e-32	1
PTGIR	4.37942e-32	0,474561272246845	0,942	0,624	8.75885e-29	1
EPAS1	1.66051e-28	0,730760159500843	0,923	0,841	3.32102e-25	1
C20orf27	2.51121e-28	0,637949024026468	0,835	0,505	5.02242e-25	1
ANGPT2	3.04317e-28	0,470559770823282	0,794	0,36	6.08634e-25	1
SYNE2	2.6195e-27	103599413984006	0,748	0,349	5.23899e-24	1
PTMS	3.89389e-26	0,685829779242734	0,968	0,942	7.78778e-23	1
PDGFA	4.59912e-26	0,842813437420221	0,832	0,719	9.19824e-23	1
MTHFR	1.14007e-25	0,341691176348672	0,794	0,383	2.28015e-22	1
FLNA	1.27772e-25	0,723527251276142	0,929	0,845	2.55545e-22	1
CSRP2	2.4689e-25	0,835731786185151	0,79	0,547	4.93781e-22	1
NET1	2.50527e-25	0,60087870828102	0,765	0,418	5.01055e-22	1
LHFPL6	1.10066e-23	0,60772534782364	0,952	0,892	2.20132e-20	1
MSX1	2.92172e-23	0,77423940202398	0,916	0,716	5.84345e-20	1
FRZB	1.80563e-22	0,664263667788172	0,9	0,848	3.61125e-20	1
ETS1	1.66369e-20	0,563840915668976	0,926	0,726	3.32739e-18	1
FRMD4A	2.90347e-20	0,633020965646123	0,777	0,441	5.80694e-17	1
IGKC	2.3943e-19	0,380119561193925	0,997	0,995	4.7886e-16	1
PTP4A3	8.2737e-19	0,744735479982635	0,752	0,454	1.65474e-15	1
ZEB2	8.28118e-20	0,668097224412434	0,984	0,955	1.65624e-15	1
UACA	1.23726e-18	0,364080525394156	0,932	0,861	2.47452e-15	1
ILF3-DT	5.67236e-18	0,291745973853661	0,858	0,407	1.13447e-14	1
EMP2	1.14507e-16	0,594344201054195	0,906	0,623	2.29013e-12	1
EBF1	5.48471e-15	0,630372129897002	0,952	0,831	1.09694e-11	1
MYLK	6.17551e-15	0,588385786313581	0,858	0,857	1.2351e-11	1
NFIB	1.33664e-14	0,732400894118204	0,635	0,295	2.67328e-11	1
TFPI	2.83848e-14	0,294777383210693	0,958	0,89	5.67695e-11	1
HES4	6.59404e-13	0,552863175884919	0,8	0,757	1.31881e-09	1
CAVIN3	1.06894e-10	0,488613655924225	0,865	0,759	2.13788e-07	1
BCL6	1.60827e-10	0,341358416542567	0,903	0,713	3.21653e-07	1
MAP1A	2.99241e-10	0,25207420880811	0,913	0,736	5.98482e-07	1
JAG1	6.75595e-09	0,558955434857144	0,784	0,712	1.35119e-05	1
MFGE8	3.58327e-08	0,469036736862967	0,874	0,875	7.16654e-05	1
PDGFRB	8.8875e-08	0,421163648361327	0,984	0,948	0.00017775	1
CRIP2	1.38298e-07	0,619458072164011	0,739	0,54	0.000276596	1
PGF	5.27023e-07	0,670820844253093	0,703	0,445	0.00105405	1
C11orf96	7.37651e-07	0,451553235770335	0,965	0,898	0.0014753	1
TCF4	2.11916e-06	0,405925014599359	0,981	0,91	0.00423832	1
BATF3	4.29064e-07	0,269445694680842	0,723	0,413	0.000858127	1
MGLL	5.21715e-06	0,465878863002785	0,706	0,373	0.0104343	1
SOD3	0.000183105	0,349214219614625	0,932	0,94	0.366211	1
MYO1B	8.76389e-06	0,498170049995389	0,91	0,736	0.175278	1
GUCY1A1	0.000958525	0,523511407865707	0,852	0,888	1.91705	1
GSN	0.00155892	0,338996868850567	0,845	0,801	3.11783	1
EHD2	0.00158506	0,540578933673007	0,906	0,852	3.17013	1
LURAP1L	0.00367272	0,277287333906577	0,903	0,72	7.34545	1
MAP3K20	0.00401791	0,40615780893487	0,806	0,754	8.03581	1
PHLDB2	0.011627	0,571637133684818	0,819	0,664	23.254	1
CD59	0.0195401	0,425043040600058	0,965	0,953	39.0803	1
CCDC3	0.0411002	0,715640518810667	0,552	0,225	82.2005	1
ADAMTS1	0.0429047	0,772572025902509	0,742	0,687	85.8094	1
TGFBI	0.275188	0,365480086028668	0,761	0,555	550.375	1
RAMP1	0.333419	0,512125257752779	0,652	0,575	666.838	1
ADRA2A	0.363321	0,585474059938248	0,681	0,542	726.642	1
OLFML2A	0.423617	0,350089453293364	0,823	0,62	847.234	1
CRISPLD2	0.585363	0,552666495636795	0,974	0,895	1170.73	1
CAV2	3.00903	0,687433093176737	0,665	0,618	6018.06	1
NRARP	0.420858	0,545064248194299	0,635	0,549	841.716	1
NRP1	5.13188	0,273942105923383	0,916	0,63	10263.8	1
PHLDA2	6.98429	0,476969563362282	0,703	0,629	13968.6	1
LIMS2	13.8412	0,295272124749458	0,632	0,281	27682.3	1
KANK2	29.0994	0,459513019799918	0,777	0,767	58198.8	1
KLHL23	36.2641	0,554687881800143	0,577	0,156	72528.2	1
CAVIN1	2922.57	0,356302188551379	0,871	0,916	5.84514e+06	1
SYNM	299.585	0,37008217065978	0,29	0,304	599171	1
COX4I2	3180.88	0,642746535515554	0,661	0,567	6.36175e+06	1
KCNE4	5151.58	0,442116773962261	0,639	0,41	1.03032e+07	1
CRIP1	12585.5	0,517815405525171	0,6	0,403	2.5171e+07	1
COL18A1	29707.7	0,301848485170609	0,958	0,961	5.94154e+07	1
SERPINI1	80131.1	0,556246633775927	0,613	0,385	1.60262e+08	1
TBX2	94461.3	0,25790010703871	0,729	0,472	1.88923e+08	1
ADAP2	98845.1	0,471251078781293	0,629	0,504	1.9769e+08	1
RCAN2	10738.5	0,339815663436455	0,623	0,483	2.14769e+08	1
PPP1R14A	1.49262e+06	0,564997187009346	0,565	0,211	2.98523e+09	1
PDE5A	4.46848e+06	0,484034000133442	0,6	0,382	8.93695e+09	1
FILIP1	584415	0,455498214320215	0,574	0,491	0,000116882937464756	1
SLIT3	7.12126e+06	0,528662183032879	0,613	0,422	0,000142425248445668	1
RBPMS	9.41811e+06	0,480237411810947	0,781	0,731	0,000188362277808904	1
CKB	3.68671e+07	0,33041081592176	0,597	0,425	0,000737341259624326	1
FRY	8.12252e+06	0,677576359795393	0,532	0,382	0,00162450319561752	1
CRYAB	2.72995e+09	0,316975139472124	0,642	0,724	0,0545989621543283	1
NRGN	3.13405e+09	0,531729456009038	0,542	0,439	0,0626809791470545	1
CRIM1	0,000249680479901082	0,30645824044192	0,416	0,54	0,499360959802165	1
SORBS2	0,00454758125261957	0,378571482514209	0,487	0,284	1	1
ESAM	0,00750257095690356	0,497720707291621	0,477	0,083	1	1
COL1A21	5.85436e-69	0,999540552285336	1	0,998	1.17087e-65	2
COL1A1	6.40752e-58	1016316553721	1	0,996	1.2815e-54	2
SPARC	5.80213e-54	0,87549344398619	1	0,989	1.16043e-50	2
HTRA1	5.88831e-55	0,902249824963862	1	0,887	1.17766e-51	2
CTHRC11	3.38268e-43	0,899497955221821	0,996	0,934	6.76536e-40	2
PCOLCE1	7.97384e-41	0,633936617666123	1	0,991	1.59477e-38	2
OMD1	6.43398e-41	0,791827516654985	0,966	0,829	1.2868e-36	2
EDIL3	8.02228e-39	0,822496448712983	0,931	0,799	1.60446e-35	2
ADAM12	8.32527e-38	0,554219058372738	0,914	0,814	1.66505e-34	2
COL11A1	1.12821e-35	116882450086627	0,845	0,715	2.25642e-33	2
COL3A11	1.23399e-35	0,661806927740633	1	0,995	2.46798e-32	2
COL12A1	2.69436e-36	100465486630722	0,97	0,745	5.38872e-32	2
FBLN11	5.21609e-35	0,735136691711384	0,991	0,877	1.04322e-32	2
MFAP2	5.36202e-36	0,636746631026007	0,966	0,862	1.0724e-31	2
CTSK1	9.6238e-34	0,751888573660294	1	0,963	1.92476e-30	2
AEBP1	1.22684e-33	0,581687424744422	1	0,974	2.45367e-30	2
ALPL	2.87459e-33	0,494258889528187	0,961	0,849	5.74918e-30	2
PPIC1	1.29876e-32	0,603506019109936	0,996	0,882	2.59752e-29	2
MFAP41	2.37478e-32	0,659775650242895	0,991	0,861	4.74957e-29	2
MDK1	1.77212e-31	0,700373733219229	1	0,929	3.54424e-29	2
VCAN1	4.74009e-31	0,79724918780592	1	0,963	9.48019e-28	2
THSD4	5.17357e-31	0,409315522930012	0,849	0,674	1.03471e-27	2
OLFML31	7.00802e-31	0,655761459549675	0,983	0,866	1.4016e-28	2
CRABP21	7.05753e-31	0,64010967771545	0,97	0,866	1.41151e-27	2
GAS11	3.33188e-30	0,68544361079103	0,97	0,834	6.66377e-28	2
OGN	4.88666e-30	0,809231468962134	0,849	0,509	9.77331e-27	2
THBS2	2.85896e-29	0,64028329536563	0,957	0,885	5.71792e-26	2
PRSS231	3.94395e-29	0,694430662956323	0,991	0,965	7.88789e-26	2
ITGBL1	2.11322e-28	0,720048887605514	0,892	0,643	4.22644e-25	2
LOX	4.17907e-28	0,52998482857812	0,897	0,586	8.35813e-25	2
DSEL1	1.68627e-27	0,613036616747149	0,983	0,697	3.37253e-24	2
CERCAM1	2.00223e-27	0,477284668434752	0,996	0,917	4.00445e-24	2
GALNT5	4.94116e-26	0,433780624168895	0,871	0,74	9.88232e-23	2
MEG3	1.59749e-25	0,606407682252504	1	0,957	3.19497e-22	2
WNT5A1	1.84167e-25	0,639749955425606	0,991	0,92	3.68334e-22	2
DCN1	6.13936e-26	0,585031965961165	1	0,985	1.22787e-21	2
GOLM1	4.07287e-24	0,395552782126944	0,94	0,84	8.14574e-21	2
COL5A1	5.59375e-22	0,591406600806512	0,996	0,96	1.11875e-18	2
LRRC15	2.324e-21	0,586264000842412	0,841	0,732	4.648e-18	2
BARX1	5.47543e-21	0,25956573975104	0,884	0,779	1.09509e-17	2
RGCC	6.55882e-21	0,381344633294343	0,802	0,749	1.31176e-17	2
BASP11	9.98218e-21	0,53150342828956	0,983	0,927	1.99644e-17	2
CPXM2	1.45699e-20	0,802254894354334	0,793	0,555	2.91397e-17	2
CREB3L1	3.02324e-20	0,460059742799549	0,914	0,808	6.04648e-17	2
MMP21	4.53727e-20	0,55019547594845	0,991	0,956	9.07454e-17	2
MXRA8	7.55954e-20	0,501253657035593	0,983	0,823	1.51191e-16	2
POSTN1	1.24204e-20	0,975551553613703	0,922	0,831	2.48408e-17	2
COL5A21	1.9411e-19	0,484599799402014	1	0,981	3.8822e-16	2
SNCAIP	2.05276e-19	0,444475382844219	0,884	0,736	4.10553e-16	2
RORB1	3.78217e-20	0,528793520035751	0,996	0,857	7.56434e-16	2
PODNL1	1.51658e-18	0,334002413124659	0,866	0,762	3.03316e-16	2
IFI6	3.02424e-19	0,507701370155651	0,978	0,894	6.04848e-15	2
PERP	6.01538e-18	0,429239957091979	0,81	0,461	1.20308e-14	2
LEPR	7.02206e-18	0,831873795828534	0,81	0,746	1.40441e-14	2
HMCN1	7.58454e-18	0,500172164074599	0,931	0,842	1.51691e-14	2
ITGB5	2.37681e-17	0,413708192296384	0,987	0,922	4.75363e-14	2
FKBP10	2.756e-17	0,463082563659703	0,996	0,914	5.512e-14	2
IGF11	3.05614e-17	0,536285536123708	0,948	0,814	6.11227e-14	2
FAP	4.76045e-18	0,477344540640663	0,961	0,877	9.52091e-15	2
NR2F1	5.37276e-17	0,329987670249342	0,853	0,797	1.07455e-13	2
CFD1	7.81935e-18	0,692835396652695	0,909	0,745	1.56387e-13	2
LOXL1	4.31976e-16	0,409214722130537	0,974	0,734	8.63951e-13	2
FLRT2	4.27864e-15	0,288543738826043	0,836	0,578	8.55728e-13	2
PTGDS1	5.58856e-15	0,65952038112545	0,991	0,944	1.11771e-11	2
SERPINF11	6.04102e-15	0,437734723545325	1	0,98	1.2082e-12	2
ARL4C	1.02169e-14	0,360417322441387	0,815	0,683	2.04337e-11	2
SPON1	1.39496e-14	0,460842695680288	0,802	0,63	2.78993e-12	2
LUM1	3.32871e-14	0,538850174662656	1	0,98	6.65742e-11	2
CDH11	4.35812e-15	0,373892013945653	0,996	0,941	8.71625e-11	2
C1QTNF6	9.80517e-14	0,27434610358725	0,862	0,774	1.96103e-10	2
TRABD2A	1.11229e-13	0,26361434231516	0,871	0,824	2.22457e-10	2
RCN11	1.92374e-13	0,441972147941657	0,983	0,894	3.84749e-10	2
EFEMP2	2.92239e-13	0,436489438607443	0,974	0,923	5.84477e-10	2
KDELR3	2.94302e-14	0,382701743675547	0,862	0,603	5.88605e-12	2
SH3BP51	1.48693e-12	0,353172992131173	0,957	0,882	2.97386e-09	2
LRP1	1.65809e-12	0,315981405533412	0,978	0,903	3.31617e-09	2
FTL	3.10808e-12	0,421691186404109	1	0,986	6.21616e-09	2
LGALS11	3.9459e-12	0,339671931568143	1	0,972	7.8918e-09	2
PLTP	4.24218e-12	0,434462201456738	0,94	0,801	8.48435e-09	2
DPT1	5.58772e-12	0,468918353599761	0,931	0,89	1.11754e-08	2
COL6A11	1.11224e-11	0,421906595217752	1	0,992	2.22448e-08	2
OLFML2B1	1.76235e-11	0,426408401420079	0,987	0,931	3.5247e-08	2
GPX81	1.8431e-11	0,387946050125234	0,922	0,863	3.68621e-08	2
GPNMB1	1.92274e-11	0,415015979479127	0,961	0,755	3.84547e-08	2
C1R1	2.2769e-11	0,403565957943115	1	0,988	4.5538e-08	2
COPZ2	2.3236e-11	0,444901242013767	0,862	0,667	4.6472e-08	2
RCN3	4.68564e-11	0,39348395542246	0,983	0,926	9.37128e-08	2
ISLR	5.25994e-11	0,384309821061701	0,953	0,81	1.05199e-07	2
SPON21	7.87965e-11	0,436600677835896	0,931	0,874	1.57593e-07	2
CLMP	8.60113e-11	0,333652971261134	0,909	0,849	1.72023e-07	2
ROBO1	9.69023e-11	0,344558674667466	0,97	0,852	1.93805e-07	2
PLXDC21	1.3544e-10	0,355202166199801	0,909	0,684	2.70881e-07	2
TMEM98	1.41648e-10	0,357549096589704	0,909	0,736	2.83296e-07	2
CRISPLD1	1.92552e-10	0,419052819166427	0,716	0,542	3.85104e-07	2
MMP23B	2.89002e-11	0,323897706470376	0,918	0,86	5.78004e-07	2
METRNL	3.60552e-10	0,384933289271796	0,953	0,767	7.21104e-07	2
PLPP1	3.71771e-10	0,401158945035661	0,974	0,897	7.43543e-07	2
SH3D19	5.3737e-10	0,344343628435217	0,909	0,707	1.07474e-06	2
MOXD11	6.38588e-10	0,407015100754015	0,892	0,76	1.27718e-06	2
PRDX4	6.79971e-10	0,374674846695321	0,978	0,927	1.35994e-06	2
FBLN21	7.90621e-10	0,434880848795947	0,996	0,964	1.58124e-06	2
ADAMTS21	8.21648e-10	0,368021565703464	0,983	0,912	1.6433e-07	2
EPSTI1	1.31695e-09	0,253583332363342	0,892	0,835	2.6339e-06	2
CXCL141	1.44879e-09	0,515339350427397	0,948	0,744	2.89757e-07	2
CALU	2.65514e-09	0,361716270853071	0,987	0,939	5.31028e-06	2
DIO21	4.53939e-09	0,425434491577062	0,94	0,909	9.07877e-07	2
MMP14	4.86563e-09	0,334011517685918	0,996	0,917	9.73125e-07	2
TIMP2	5.19132e-09	0,350104835477056	1	0,953	1.03826e-05	2
FKBP9	5.872e-09	0,323672431641364	0,966	0,872	1.1744e-05	2
FSTL1	7.7531e-10	0,315484411598673	1	0,965	1.55062e-05	2
CLEC11A	1.09098e-08	0,384733491574546	0,996	0,957	2.18197e-05	2
CPXM11	1.15114e-08	0,350680048346074	0,987	0,944	2.30228e-05	2
FBN11	1.42979e-08	0,398556280589184	0,991	0,945	2.85959e-06	2
EFEMP1	1.73508e-08	0,323929586518061	0,888	0,845	3.47017e-05	2
FBLN5	3.3716e-08	0,391107716375985	0,767	0,577	6.74319e-05	2
TMEM176A1	4.00691e-08	0,386808777855865	0,987	0,944	8.01382e-05	2
PLEKHA5	4.07311e-08	0,455308646075341	0,957	0,825	8.14622e-05	2
OSR2	4.28461e-09	0,403435205318451	0,862	0,821	8.56922e-07	2
RSPO1	7.86763e-08	0,275670963650537	0,746	0,546	0.000157353	2
TMEM176B1	8.22508e-08	0,349607861400079	0,996	0,952	0.000164502	2
FMOD1	1.43531e-07	0,388628278941984	0,996	0,945	0.000287062	2
IGFBP5	1.95981e-07	0,93637234902642	0,983	0,847	0.000391962	2
CXCL121	4.99116e-07	0,4754535996316	1	0,971	0.000998232	2
NUPR1	5.62165e-07	0,358997816844045	0,948	0,693	0.00112433	2
PTK7	7.35786e-08	0,389725469857512	0,866	0,814	0.00147157	2
TBX31	1.07638e-06	0,314683201272574	0,961	0,697	0.00215276	2
ASPN	1.21304e-06	0,770438177266215	0,858	0,759	0.00242608	2
FGFR11	2.35224e-06	0,377741335922365	0,953	0,734	0.00470448	2
FGF7	3.58603e-07	0,327573201072821	0,853	0,679	0.000717206	2
NBL1	4.19912e-06	0,519432882628878	0,961	0,905	0.00839825	2
FSCN1	4.73287e-06	0,363813553239832	0,828	0,741	0.00946573	2
CYBRD1	5.96767e-06	0,287011427143853	0,957	0,869	0.0119353	2
PLOD2	9.86117e-06	0,28333334963069	0,862	0,685	0.0197223	2
TWIST21	2.88638e-05	0,294349965817057	0,944	0,839	0.0577277	2
GLT8D2	4.00866e-05	0,296100838754743	0,966	0,915	0.0801732	2
PDGFRA1	4.16967e-06	0,350396165308803	0,922	0,846	0.0833934	2
FN1	5.49206e-05	0,34927089864049	0,996	0,944	0.109841	2
TCEAL9	6.68592e-05	0,312903652919846	0,978	0,906	0.133718	2
IGFBP6	9.24317e-05	0,466865822000683	0,819	0,632	0.184863	2
EGFL61	9.85118e-05	0,356994845816522	0,957	0,901	0.0197024	2
LY6E1	0.00011122	0,344208445723206	0,996	0,947	0.22244	2
FAM114A1	0.000113437	0,2635284697852	0,953	0,904	0.226875	2
GSTP1	0.000122361	0,284691325836852	0,996	0,891	0.244722	2
PGRMC1	0.000143165	0,345488702678292	0,931	0,818	0.28633	2
IGFBP4	0.000148827	0,359534828466277	1	0,993	0.297655	2
DKK3	0.000179017	0,366790808559039	0,927	0,707	0.358033	2
PRRX1	0.000200053	0,273743158355088	1	0,976	0.400107	2
LTBP2	0.000372313	0,336506529981371	0,754	0,563	0.744627	2
KCNQ1OT1	0.000456259	0,39963490769216	0,931	0,831	0.912519	2
FOSL2	6.46192e-05	0,257675582073021	0,948	0,866	1.29238	2
RGS31	0.000848702	0,297461882258514	0,961	0,844	1.6974	2
NEGR1	0.00108873	0,370641329805694	0,724	0,525	2.17746	2
PALLD	0.00169442	0,291599834338565	0,983	0,769	3.38885	2
SELENOP	0.000726618	0,335724432412711	0,97	0,877	14.5324	2
ITM2C	0.00754382	0,273281721194151	0,974	0,881	15.0876	2
MARCKS1	0.00806221	0,323597410422068	1	0,959	16.1244	2
S100A111	0.0122447	0,299080078969477	1	0,927	24.4895	2
SGCB	0.0179141	0,292803903948636	0,931	0,752	35.8282	2
RARRES21	0.0302335	0,354313924174836	1	0,92	60.4671	2
BMP4	0.0329769	0,287605410234289	0,638	0,542	65.9539	2
SERPINH1	0.0522852	0,306286840971342	0,996	0,966	104.57	2
BICC11	0.0687233	0,334707550963701	0,892	0,86	137.447	2
CDKN1C	0.0781081	0,270500238630612	0,845	0,634	156.216	2
CCDC801	0.0965114	0,273232100832926	0,991	0,949	193.023	2
ANXA21	0.0991528	0,288955965080066	1	0,955	198.306	2
ANTXR1	0.0104216	0,256368301230496	0,927	0,857	20.8431	2
COL14A1	0.109079	0,358813575223975	0,996	0,943	218.157	2
MXRA51	0.121476	0,276957232546142	0,978	0,9	242.952	2
KLF41	0.142585	0,265183659487536	0,909	0,876	285.17	2
TPBG	0.0165532	0,27995534908024	0,823	0,617	331.064	2
PDGFRL	0.0390825	0,435567748367756	0,806	0,779	78.165	2
GREM11	0.788342	0,256359066587487	0,832	0,79	1576.68	2
JDP2	1.20258	0,252137378960358	0,897	0,866	2405.17	2
RUNX2	1.37808	0,352703078059553	0,698	0,59	2756.16	2
PTGFR	1.48178	0,358303698417016	0,767	0,754	2963.56	2
ANGPTL21	1.98408	0,253731535048052	0,897	0,857	3968.16	2
SFRP21	2.86279	0,360559031373233	0,97	0,929	5725.58	2
SRPX	3.43384	0,331078839989272	0,845	0,794	6867.69	2
C1S1	4.32097	0,314865981947626	1	0,982	8641.94	2
C12orf75	8.293	0,272662228613219	0,841	0,848	16586	2
S100A4	36.2949	0,266378426260639	0,996	0,953	72589.7	2
COL8A1	655.878	0,266822020836536	0,461	0,222	1.31176e+06	2
APCDD11	1331.57	0,344823584284896	0,97	0,915	2.66313e+06	2
TMEM119	1404.89	0,277889146634925	0,806	0,8	2.80978e+06	2
CTSD	7138.32	0,269055775036039	0,987	0,892	1.42766e+07	2
CRABP11	16792.5	0,386726937767396	0,772	0,795	3.3585e+07	2
ANXA11	17520.9	0,257419529012749	0,97	0,92	3.50418e+07	2
SFRP1	24065.2	0,399923605996249	0,556	0,449	4.81304e+07	2
GJA1	33149.3	0,302002764675735	0,634	0,605	6.62986e+07	2
PLPP3	134407	0,257391263790087	0,905	0,751	2.68814e+08	2
PRELP	140762	0,423444125933149	0,724	0,682	2.81525e+07	2
TUBB2A	476120	0,30335020008046	0,746	0,692	9.52239e+08	2
ISG15	987595	0,263812896910321	0,892	0,779	1.97519e+09	2
SLC5A3	1.36866e+06	0,290698598432675	0,444	0,29	2.73731e+09	2
DIRAS3	3.62104e+06	0,458862413036443	0,582	0,54	7.24208e+09	2
NKD2	2.25183e+07	0,257658668556603	0,707	0,767	0,000450366194204778	2
CORIN	6.40118e+07	0,416401128212921	0,591	0,63	0,00128023531015404	2
ACP5	2.03437e-67	0,292574885453854	0,954	0,514	4.06874e-64	3
CD36	4.55028e-65	0,378642278688201	0,959	0,323	9.10055e-62	3
ADGRF51	2.98706e-63	112042751392645	0,986	0,527	5.97412e-60	3
ADAP21	1.27727e-62	0,542002431192374	0,968	0,458	2.55454e-60	3
LPL	1.0806e-56	0,797784856822876	0,995	0,756	2.16119e-53	3
FJX11	6.68633e-52	0,604499404989668	0,963	0,455	1.33727e-47	3
APOLD11	2.49844e-50	0,695515292677342	0,935	0,444	4.99688e-47	3
HERC5	7.08068e-49	0,277193099931549	0,935	0,529	1.41614e-45	3
SPRY4	7.46041e-48	0,413751151182119	0,894	0,467	1.49208e-44	3
CCDC102B1	4.21529e-46	134468885453621	0,986	0,628	8.43058e-43	3
TSPAN15	1.07987e-42	0,273749756895454	0,926	0,317	2.15975e-39	3
ANGPT21	5.6838e-40	123378271776656	0,912	0,371	1.13676e-36	3
NEURL1B1	5.09707e-38	0,610296895567423	0,922	0,504	1.01941e-34	3
PDGFRB1	8.54419e-36	13474710152545	0,991	0,95	1.70884e-32	3
FNIP2	3.69947e-34	0,288429385951595	0,922	0,583	7.39894e-31	3
PTGIR1	1.29471e-29	0,787847897512841	0,949	0,645	2.58942e-26	3
CHN1	9.11986e-31	124046968755531	1	0,947	1.82397e-26	3
COL18A11	7.89982e-28	0,98964054437338	1	0,954	1.57996e-24	3
SYNPO21	3.59713e-27	0,936208658523337	0,917	0,571	7.19425e-24	3
COL4A2	7.30831e-28	130897287127258	1	0,902	1.46166e-24	3
TBX21	8.0215e-27	113432013047112	0,876	0,466	1.6043e-23	3
RGS51	7.90483e-25	0,634089079245294	0,903	0,463	1.58097e-21	3
KRT181	1.01277e-24	0,346659534894023	0,922	0,562	2.02554e-21	3
UACA1	1.43197e-24	122408275306134	0,991	0,856	2.86395e-21	3
OLFML2A1	5.56593e-24	0,632130847656181	0,954	0,613	1.11319e-21	3
RAMP11	2.12468e-23	0,296267189094959	0,88	0,544	4.24937e-20	3
FAM13C1	3.74656e-24	0,787293846320429	0,903	0,455	7.49312e-20	3
LIPA	1.26152e-21	0,257000743409938	0,959	0,59	2.52304e-18	3
GPM6B	3.28968e-21	0,567037551598864	0,982	0,739	6.57937e-18	3
NR2F21	4.25762e-18	0,700872009666581	0,912	0,898	8.51525e-15	3
TNC	6.94228e-17	0,417730719028416	0,806	0,306	1.38846e-13	3
COL4A1	7.99793e-16	102590446855437	1	0,888	1.59959e-12	3
SERPINI11	8.65059e-16	0,832171648508793	0,806	0,369	1.73012e-12	3
AFAP1L21	2.41137e-15	0,279595567857736	0,922	0,511	4.82273e-12	3
AC058791.1	1.01383e-14	0,276248540995368	0,903	0,555	2.02765e-11	3
NOTCH31	3.95444e-14	0,846963159230889	0,857	0,665	7.90889e-11	3
ANKRD28	1.15222e-13	0,371833179558939	0,991	0,844	2.30445e-10	3
COX4I21	4.66848e-13	0,643218341594927	0,899	0,536	9.33696e-11	3
CCDC144A	6.99786e-13	0,321107843759663	0,774	0,343	1.39957e-09	3
DLC11	1.06464e-12	0,801725504871728	0,889	0,633	2.12929e-09	3
SLC2A3	1.32243e-12	0,822477295412364	1	0,938	2.64486e-09	3
IFIT2	4.70274e-12	0,365412409763067	0,839	0,547	9.40547e-09	3
INSR	5.84123e-11	0,255885145470246	0,806	0,369	1.16825e-07	3
PLXND1	2.35087e-10	0,544568105012633	0,899	0,607	4.70173e-07	3
NDUFA4L21	8.30383e-10	106385171195628	0,765	0,288	1.66077e-06	3
ADAMTS41	8.35472e-10	0,550222987451479	0,954	0,739	1.67094e-06	3
THBD	1.69371e-09	0,299029673505996	0,765	0,447	3.38742e-06	3
MARCKSL1	1.03085e-07	0,265087148141189	0,986	0,8	0.000206171	3
CYTOR	3.20818e-07	0,875621164712683	0,982	0,838	0.000641635	3
LGMN	4.78494e-07	0,292039196137583	0,954	0,517	0.000956988	3
A2M1	2.1549e-06	0,655752862850304	0,811	0,379	0.0043098	3
DLX51	2.87852e-06	0,761203152098931	0,747	0,285	0.00575704	3
CRISPLD21	3.04356e-06	0,822784763411369	0,995	0,897	0.00608712	3
ADCY4	9.41932e-06	0,345458220692172	0,977	0,734	0.0188386	3
CTSC	1.19847e-06	0,691691526032278	0,991	0,898	0.000239693	3
GJC11	2.31822e-05	0,859131936037446	0,866	0,72	0.0463643	3
TCF41	3.28357e-05	0,729096605506375	0,995	0,912	0.0656713	3
MRVI11	7.0888e-05	0,750165413278342	0,829	0,652	0.141776	3
SPARCL11	0.000221441	0,441119763928376	0,853	0,381	0.442882	3
ARL6IP1	0.000326633	0,305487497255573	0,972	0,788	0.653267	3
SPRED1	3.53606e-05	0,368643493060604	0,94	0,616	0.707212	3
IGFBP2	0.000701413	0,831524323561463	0,986	0,783	1.40283	3
MFGE81	0.000787931	0,625485857238737	0,862	0,877	1.57586	3
MYO1B1	0.00176209	0,813169173440172	0,811	0,764	3.52419	3
CARMN1	0.00199622	0,849324110037459	0,788	0,553	3.99243	3
PAWR1	0.00210195	0,559983558037792	0,954	0,662	4.20389	3
SAMHD1	0.00438391	0,455132056744833	0,991	0,885	8.76782	3
PTN	0.00541345	0,318912145047166	0,862	0,375	10.8269	3
ARHGAP291	0.00121963	0,844316398708297	0,728	0,412	2.43926	3
TFPI1	0.0865621	0,955171608031469	0,991	0,889	173.124	3
TINAGL11	0.011808	0,734042033371095	0,737	0,384	23.616	3
PRDM1	0.302989	0,404904382551281	0,977	0,822	605.978	3
PTP4A31	1.40533	0,778488452050159	0,714	0,481	2810.66	3
MYC	2.56009	0,409840354002255	0,774	0,534	5120.18	3
KCNE41	3.48003	0,78341036723143	0,71	0,414	6960.06	3
EPS81	4.25514	0,52034125786326	0,779	0,677	8510.28	3
STEAP41	4.92676	0,986125218918356	0,719	0,299	9853.53	3
LOXL2	0.726886	0,371863619076866	0,986	0,901	14537.7	3
C20orf271	15.2055	0,658631806227462	0,779	0,537	30410.9	3
RBPMS1	22.696	0,433979118605651	0,922	0,711	45391.9	3
PLXDC1	4.27924	0,677395110313043	0,995	0,933	8558.47	3
LHFPL61	162.533	0,534475735797914	0,834	0,915	325067	3
SPRY1	401.794	0,481748623980325	0,977	0,83	803588	3
TIMP31	1647.81	0,507693714843758	0,747	0,452	3.29562e+06	3
FMO3	2130.15	0,475764265915795	0,954	0,729	4.2603e+06	3
ZEB21	235.75	0,508382341319091	0,991	0,955	471500	3
ZCCHC24	4479.57	0,275670751268145	0,977	0,823	8.95914e+06	3
APOE1	13703.1	0,680841707547776	0,986	0,94	2.74063e+07	3
IGFBP71	29234	0,334877432810092	0,972	0,992	5.8468e+07	3
FAM162B1	44229.4	0,578059463142141	0,719	0,507	8.84589e+07	3
TNS21	79554.3	0,492232772304994	0,889	0,725	1.59109e+08	3
ALCAM	190785	0,258440656154989	0,664	0,379	3.81569e+08	3
TMEM204	312959	0,274293526215334	0,871	0,519	6.25917e+08	3
HGF	3.32438e+06	0,630548324574408	0,788	0,596	6.64875e+09	3
KRT5	5.24543e+06	0,301769009101106	0,29	0,265	0,000104908630963279	3
LGALS3BP	8.40697e+06	0,47508361853973	0,995	0,958	0,000168139401867865	3
HIC1	845801	0,382776110961268	0,912	0,692	0,000169160151022168	3
OSMR	1.95438e+07	0,561782395679738	0,949	0,798	0,000390875759710291	3
GPX31	3.43258e+07	0,485607206979289	0,627	0,308	0,000686515863522242	3
ESAM1	7.94908e+07	0,350610647738646	0,378	0,126	0,00158981659982727	3
TPPP3	1.06086e+08	0,322096561719288	0,719	0,562	0,00212171726272815	3
YPEL2	1.73034e+08	0,274151823144912	0,977	0,742	0,00346068006614614	3
CAV11	3.21758e+08	0,373312329746151	0,908	0,846	0,00643515252695458	3
COL5A3	3.50102e+08	0,52555449779526	0,908	0,769	0,00700204434439513	3
TJP1	1.83688e+09	0,407771390459847	0,908	0,681	0,0367375605430157	3
GGT5	1.89166e+08	0,594286951802875	0,982	0,834	0,037833220846622	3
ETS11	2.00304e+09	0,482903530810687	0,779	0,763	0,0400608822287399	3
SEMA5A	2.54986e+09	0,485406027564204	0,751	0,551	0,0509972696301213	3
EVA1B	2.60649e+09	0,385759644151771	0,986	0,913	0,0521297684321017	3
EPAS11	3.13274e+09	0,313074411108039	0,797	0,866	0,0626547367581428	3
ITGA71	5.83694e+09	0,725398809793023	0,631	0,284	0,116738765543596	3
GSN1	6.51418e+09	0,346343004648917	0,76	0,818	0,130283611265287	3
ECM2	8.68005e+09	0,373791007015174	0,972	0,841	0,173601069868365	3
PXDN	0,000100364219927969	0,484088872006406	0,986	0,824	0,200728439855938	3
JAG11	0,000117503262435913	0,584024760457417	0,77	0,719	0,235006524871826	3
PMEPA1	0,000144618229852582	0,467051628305101	0,995	0,92	0,289236459705165	3
KLF9	0,000155521557470099	0,474849733099033	0,972	0,886	0,311043114940198	3
CITED2	0,000319479231589574	0,34895143192059	0,687	0,513	0,638958463179148	3
INPP4B1	0,000424879696609591	0,347374898945859	0,452	0,295	0,849759393219182	3
EDNRA1	0,000491564722497243	0,510596495400817	0,719	0,777	0,983129444994486	3
ARHGDIB1	0,000703757661894538	0,320539477190882	0,461	0,47	1	3
ADGRA2	0,000810443571741722	0,305791155845026	0,972	0,835	1	3
MAP1A1	0,00105761935265332	0,325931680241007	0,903	0,75	1	3
ITGA11	0,00112625197906129	0,519670714416654	0,774	0,638	1	3
C1QTNF11	0,00116989676203478	0,305914700970469	0,668	0,619	1	3
UGCG	0,00129843030831435	0,585760455331172	0,982	0,905	1	3
PGF1	0,00133861521903921	0,536998543728344	0,618	0,476	1	3
PPP1R14A1	0,00157941413581586	0,357737595082936	0,567	0,235	1	3
NFATC4	0,00159027817815924	0,263312296862152	0,843	0,815	1	3
EMP21	0,00161324313994223	0,279856927822658	0,765	0,665	1	3
GUCY1A11	0,00202683108371691	0,390313469428327	0,945	0,871	1	3
CRIP21	0,00214961408499028	0,456603391891299	0,673	0,565	1	3
PDGFA1	0,00250895656833427	0,521002528177825	0,668	0,753	1	3
AHR	0,00253093927362601	0,402109793141402	0,991	0,955	1	3
SOCS1	0,00299187816179709	0,485817471643523	0,899	0,819	1	3
PRKG1	0,00319024911626341	0,355070216726072	0,954	0,863	1	3
LAMC1	0,00379920719218909	0,348748047622946	0,968	0,934	1	3
EBF11	0,00456492100220708	0,41549050763773	0,816	0,861	1	3
CSF1	0,00462306798520213	0,355124037034401	0,968	0,838	1	3
SPATS2L	0,00579283556788754	0,27779465123776	1	0,961	1	3
CYGB	0,00718304635663476	0,336440703926855	0,908	0,748	1	3
BGN	0,00815170824012128	0,316781034845473	0,774	0,862	1	3
VCAN2	2.06858e-08	0,716435043966021	0,995	0,965	4.13715e-05	4
MEG31	9.05523e-06	0,713342748179623	0,958	0,964	0.0181105	4
PTGDS2	4.72132e-05	0,616767396295145	0,979	0,948	0.0944263	4
NOVA1	0.0206149	0,439268691163563	0,672	0,467	41.2297	4
RORB2	1.3143	0,675080090093684	0,906	0,874	2628.6	4
CXCL142	5.36734	0,720684825348019	0,911	0,755	10734.7	4
CXCL122	216.077	0,422045424561738	0,995	0,972	432155	4
COL16A1	252.035	0,54405143448936	0,896	0,917	504071	4
FBLN22	33.8828	0,447177604009406	0,974	0,968	67765.6	4
MFAP42	362.586	0,400755485875669	0,917	0,875	725172	4
ITGB8	882.913	0,295191185003574	0,615	0,559	176583	4
IGFBP51	107.306	0,314854529996234	0,958	0,854	214611	4
WNT5A2	1456.35	0,488498013967811	0,922	0,932	2.9127e+06	4
CFD2	1486.28	0,768050768176882	0,771	0,769	2.97256e+06	4
PDGFRA2	4093.08	0,463008701297723	0,792	0,867	8.18615e+06	4
HTRA11	5769.28	0,385998514620979	0,932	0,899	1.15386e+07	4
AC020916.1	10537.5	0,587889993348221	0,901	0,936	2.1075e+07	4
IGHA1	40266.4	0,315643716424024	0,328	0,669	8.05327e+06	4
CD241	80589.7	0,516912880318258	0,729	0,799	1.61179e+08	4
HAS21	229937	0,448024463994335	0,849	0,866	4.59875e+08	4
MXRA81	369594	0,374422907136872	0,901	0,839	7.39187e+08	4
MDK2	7952.89	0,324456158806325	0,927	0,941	1.59058e+08	4
ABCA8	1.18244e+06	0,480188095965609	0,281	0,21	2.36489e+09	4
LRP11	1.70424e+06	0,507426789172535	0,865	0,921	3.40847e+09	4
MMP141	2.93057e+06	0,343167449690981	0,865	0,937	5.86114e+09	4
KLF42	590496	0,402602111250258	0,828	0,889	0,000118099150582696	4
FGFR12	6.98252e+06	0,396948928863847	0,802	0,761	0,000139650388103485	4
DPYSL3	7.81249e+06	0,255631849471147	0,745	0,642	0,000156249812819689	4
IGF12	1.06486e+07	0,604708929421308	0,781	0,841	0,000212972613720975	4
CCDC802	1.16343e+07	0,427186160397391	0,906	0,962	0,000232685003827937	4
AHNAK	3.48484e+07	0,277828095035876	0,906	0,924	0,000696968323044057	4
COL5A11	4.23376e+06	0,32942793081901	0,953	0,967	0,00084675130682176	4
C1S2	489162	0,258785733677972	1	0,983	0,000978323531935001	4
IGHG2	5.90934e+07	0,842088404503842	0,807	0,929	0,00118186756278695	4
ANK21	1.1266e+08	0,317922144754243	0,708	0,647	0,00225319036687215	4
2001-06-01	1.16666e+08	0,408076306514238	0,979	0,958	0,00233332090142354	4
ISLR1	1.19032e+08	0,409417180512174	0,807	0,835	0,00238063579609963	4
FBLN12	1.29605e+08	0,329008855029547	0,87	0,897	0,00259209713467408	4
COL6A12	1.35364e+08	0,253681389723845	1	0,993	0,00270727433627276	4
MMP19	1.89702e+08	0,381398448248965	0,755	0,895	0,00379404967168962	4
SLC5A31	3.10063e+08	0,306453414896857	0,354	0,307	0,00620125667757209	4
LOXL11	3.21302e+08	0,283388389948534	0,849	0,759	0,00642603395557756	4
MXRA52	3.33396e+08	0,354670088142287	0,859	0,919	0,00666791376870516	4
CCN11	4.0522e+08	0,494234464237981	0,755	0,768	0,00810439018755837	4
SOX4	4.46772e+08	0,428185354456762	0,88	0,866	0,00893544572137736	4
CDKN1C1	4.92406e+08	0,306498554124324	0,714	0,658	0,00984811231816005	4
OSR21	5.47266e+08	0,415267594392873	0,745	0,838	0,0109453258987301	4
AEBP11	8.21666e+08	0,302414413413287	0,979	0,977	0,0164333193045687	4
NFKBIZ	1.13702e+09	0,275861311089232	0,849	0,877	0,0227403256790944	4
PRSS121	1.37386e+09	0,315023467897757	0,734	0,736	0,0274771080904139	4
DUSP11	2.53342e+09	0,255709759328227	0,984	0,987	0,0506684719103645	4
OGN1	2.85964e+08	0,302493149578507	0,568	0,558	0,0571928510520139	4
PRSS232	3.17026e+09	0,273169336640716	0,938	0,974	0,063405134101617	4
DNM1	4.21041e+09	0,356660253490757	0,688	0,71	0,0842081614967748	4
IGKC1	4.22776e+09	0,530242576777381	0,99	0,996	0,0845551427809191	4
IL11RA1	5.59193e+09	0,374313250315207	0,755	0,79	0,111838585297158	4
PLPP11	5.92942e+09	0,418450194373699	0,833	0,919	0,118588440302943	4
TBX32	6.25011e+09	0,314114537772203	0,807	0,726	0,125002232558723	4
CLU	0,000112740655752852	0,619248916350695	0,807	0,847	0,225481311505703	4
PLPP31	0,000159629945689094	0,524906815066811	0,734	0,779	0,319259891378188	4
SH3D191	0,000409852321708302	0,297764741625831	0,719	0,74	0,819704643416604	4
MIR99AHG	0,000576523799686991	0,341106772911687	0,547	0,648	1	4
ZEB1	0,000762000138878452	0,287924836029696	0,599	0,607	1	4
HSPG2	0,000954934258203964	0,324471414842627	0,63	0,637	1	4
MAFB	0,000973622692502679	0,434694617629574	0,703	0,669	1	4
COL27A1	0,001805869105339	0,319452167183373	0,766	0,846	1	4
SCARA51	0,00354299006832772	0,275604821823631	0,568	0,605	1	4
TMEM150C	0,00373978973798656	0,271601920233972	0,609	0,702	1	4
SLC6A6	0,00467632087670365	0,30503661816302	0,312	0,356	1	4
FGL2	0,00485519811339096	0,37087633718432	0,328	0,336	1	4
ABI3BP1	0,00543732258356553	0,269760414895269	0,656	0,734	1	4
DPT2	0,00818589583255888	0,288371417894825	0,766	0,915	1	4
FTH11	1.69702e-55	102516412204396	1	0,992	3.39403e-52	5
G0S2	2.1311e-51	193976827562909	0,956	0,77	4.26221e-48	5
CXCL11	1.00354e-48	209547765182407	0,951	0,803	2.00708e-46	5
SOD21	7.49198e-47	0,99816216967575	1	0,9	1.4984e-42	5
PDPN	3.81778e-43	0,843059098637502	0,984	0,855	7.63556e-40	5
MT2A	9.67576e-39	145515274001607	0,995	0,874	1.93515e-35	5
NAMPT	1.03638e-37	0,968541669529155	1	0,95	2.07277e-34	5
CXCL131	1.36568e-36	13719148150803	0,995	0,939	2.73135e-32	5
GRAMD1A	7.00402e-33	0,721352855235858	0,984	0,855	1.4008e-30	5
CXCL21	3.50153e-32	146982075892982	0,945	0,852	7.00306e-29	5
CA12	7.53923e-30	0,633124229848094	0,907	0,736	1.50785e-26	5
CTSH1	3.35653e-28	0,82414184355627	0,995	0,934	6.71307e-25	5
IL3RA	4.65233e-26	0,266053621156617	0,846	0,684	9.30465e-24	5
SDC4	5.97929e-26	0,676941066219985	0,885	0,698	1.19586e-22	5
SLC43A2	1.67368e-25	0,430137306644581	0,912	0,694	3.34736e-22	5
SLC39A14	5.46334e-25	0,66311306236297	0,94	0,716	1.09267e-21	5
UBD1	2.79834e-24	0,671589851747469	0,989	0,892	5.59668e-21	5
TNFAIP61	4.24376e-24	0,937899628173628	0,956	0,852	8.48753e-21	5
STEAP11	5.04752e-24	0,754949429203814	0,956	0,9	1.0095e-20	5
CCL191	2.81957e-23	128247896122743	0,918	0,811	5.63914e-20	5
TDO2	1.06513e-22	0,637268516758516	0,956	0,876	2.13027e-19	5
IL4I1	7.6577e-21	0,369568152347215	0,852	0,738	1.53154e-17	5
CFB	8.08721e-21	0,503111752419461	0,896	0,792	1.61744e-17	5
MAOB	1.15888e-20	0,269205906740514	0,769	0,419	2.31775e-17	5
SFRP22	2.76125e-20	0,848287768547519	0,984	0,929	5.52249e-17	5
CYP7B11	3.20779e-20	0,645302693741669	0,984	0,635	6.41558e-17	5
CXCL6	8.57741e-20	101684782179378	0,819	0,732	1.71548e-17	5
TNIP3	9.04754e-20	0,313004258831974	0,797	0,702	1.80951e-16	5
CCL5	1.40861e-19	0,504638975298552	0,802	0,691	2.81722e-16	5
SERPINE11	8.61938e-19	0,56000254493872	0,934	0,844	1.72388e-15	5
ALDH1A3	1.33241e-18	0,265125075702342	0,791	0,614	2.66483e-15	5
NFKBIA1	3.46643e-18	0,782034668801592	1	0,834	6.93286e-16	5
ENPP21	4.00119e-18	0,442811701495832	0,918	0,775	8.00238e-15	5
EMP11	7.60842e-18	0,682121174855287	1	0,952	1.52168e-14	5
STEAP21	1.04861e-17	0,540005433524676	0,962	0,853	2.09722e-14	5
RARRES22	1.1451e-17	0,574858169320553	1	0,923	2.2902e-14	5
PTGES	3.73381e-17	0,5945629783387	0,879	0,761	7.46763e-15	5
IL1R11	8.14836e-17	0,548139879387507	0,973	0,68	1.62967e-13	5
ADAMDEC1	1.1469e-16	0,614144368764641	0,874	0,784	2.2938e-13	5
ITGA8	1.38489e-16	0,364531328481026	0,978	0,772	2.76977e-13	5
IL321	2.35543e-16	0,617715080122844	0,967	0,844	4.71086e-13	5
NCOA7	2.64192e-16	0,489243494792833	0,995	0,919	5.28384e-13	5
LPAR11	2.91816e-16	0,475001516505419	0,967	0,867	5.83631e-13	5
IER3	6.78975e-16	113768896093082	0,956	0,795	1.35795e-12	5
SLC16A3	1.40906e-15	0,403298886417725	0,918	0,795	2.81812e-12	5
CCL21	2.32523e-15	0,887156072302324	0,973	0,717	4.65047e-12	5
VCAM1	2.61918e-15	0,642761799677772	0,995	0,829	5.23837e-12	5
SLC39A8	3.95315e-16	0,582875508340145	0,835	0,688	7.90629e-12	5
CLU1	4.40838e-15	0,920956796632911	0,962	0,826	8.81676e-12	5
TNFRSF12A	1.10919e-15	0,588048373021336	0,912	0,732	2.21839e-11	5
SELENOM1	2.31679e-14	0,43047188882324	1	0,928	4.63357e-12	5
RND31	3.73583e-14	0,646777903629876	0,984	0,941	7.47166e-11	5
TNFAIP2	4.58088e-14	0,587311599770534	0,901	0,688	9.16176e-11	5
IFNGR11	1.0142e-13	0,549754629120985	1	0,939	2.0284e-10	5
BIRC3	1.0303e-13	0,576593206357648	0,89	0,74	2.06061e-11	5
KYNU	1.89837e-13	0,485870998798643	0,934	0,834	3.79674e-10	5
F3	4.31533e-13	0,63189888356175	0,874	0,731	8.63066e-10	5
KPNA2	9.4778e-13	0,262091618644799	0,874	0,572	1.89556e-09	5
NINJ1	1.95696e-12	0,597550352927938	0,857	0,527	3.91392e-09	5
LBP	3.28177e-13	0,866819126816924	0,764	0,674	6.56355e-09	5
DCN2	3.58429e-12	0,532730583617614	1	0,986	7.16858e-09	5
LUM2	3.89676e-12	0,559229371672531	1	0,98	7.79353e-09	5
C3	6.67949e-12	0,653966150802323	0,813	0,535	1.3359e-09	5
MT1E	2.52023e-11	0,751254771462065	0,907	0,738	5.04046e-08	5
GAPDH1	6.72977e-11	0,448078003556482	1	0,959	1.34595e-07	5
C11orf961	9.79111e-11	0,65745037031505	0,984	0,902	1.95822e-07	5
MMP22	1.33301e-10	0,586461512598419	1	0,957	2.66603e-07	5
ICAM1	2.6043e-10	0,431027379494112	0,901	0,79	5.20859e-07	5
SCARA3	3.92685e-10	0,276923813790959	0,808	0,691	7.85369e-07	5
FAM20A	6.57868e-10	0,432554003603757	0,901	0,838	1.31574e-06	5
PKM	1.25669e-09	0,465785421011403	0,984	0,873	2.51338e-06	5
ETS2	1.2572e-09	0,391278506907002	0,874	0,537	2.5144e-06	5
PHLDA1	2.20904e-09	0,569713166292994	1	0,953	4.41808e-06	5
NRCAM	3.36493e-09	0,351723121894597	0,907	0,803	6.72986e-06	5
FDCSP	7.7109e-10	0,72639950494919	0,725	0,648	1.54218e-05	5
SAT1	1.0346e-08	0,838203213254961	0,984	0,954	2.06919e-05	5
HAS22	1.07239e-08	0,447711960373977	0,956	0,852	2.14477e-05	5
IL6	1.28231e-08	0,682387590784028	0,824	0,693	2.56462e-05	5
ID2	2.59591e-08	0,48885600634311	0,835	0,635	5.19182e-05	5
TWIST22	2.85178e-08	0,420760230290286	0,951	0,842	5.70355e-05	5
CCDC71L	3.77961e-08	0,677931754268378	0,934	0,863	7.55922e-05	5
MOXD12	3.97257e-08	0,325986720208084	0,973	0,754	7.94514e-05	5
PCSK51	5.20966e-08	0,402395239205355	0,934	0,858	0.000104193	5
PPA1	8.49436e-08	0,403142151186031	0,973	0,672	0.000169887	5
PRKAR2B	1.06135e-08	0,418338493172025	0,951	0,815	2.1227e-05	5
CTSB1	1.57778e-07	0,436120037767695	0,989	0,889	0.000315556	5
NNMT1	1.85567e-08	0,427980094998922	1	0,943	0.000371134	5
WFDC2	3.03612e-07	0,932837381381801	0,692	0,48	0.000607225	5
MME	6.31037e-07	0,595533727954201	0,802	0,699	0.00126207	5
PDLIM4	7.32564e-07	0,451246568079875	0,857	0,729	0.00146513	5
TNFRSF1B	1.10673e-06	0,303665268854916	0,775	0,563	0.00221347	5
LAMA21	1.71552e-06	0,288231789787429	0,912	0,799	0.00343104	5
S100A101	2.2761e-06	0,448951634676715	0,995	0,944	0.0045522	5
GLIS3	2.82595e-06	0,42833353322145	0,863	0,705	0.00565189	5
DIO22	2.98315e-06	0,586578482929556	0,967	0,907	0.0059663	5
CLMP1	3.69825e-06	0,349343897102413	0,934	0,848	0.0073965	5
FAM20C	4.07014e-06	0,483928192394452	0,907	0,745	0.00814028	5
CTSS	1.39146e-05	0,377400322947175	0,89	0,802	0.0278291	5
ANTXR11	1.50016e-05	0,434502419341769	0,962	0,855	0.0300032	5
CD40	2.25499e-05	0,297712397692453	0,929	0,722	0.0450998	5
BOC	3.43422e-05	0,273214761934268	0,841	0,578	0.0686844	5
EGFL62	6.07464e-05	0,500136833047252	0,984	0,899	0.121493	5
EFEMP11	6.21427e-05	0,322449879408614	0,945	0,839	0.124285	5
TWIST11	9.41734e-06	0,47001469866376	0,973	0,949	0.188347	5
AIM2	0.000103822	0,342525733070278	0,813	0,736	0.207643	5
S100A131	0.000132302	0,407118812620927	0,94	0,904	0.264603	5
LGALS31	0.000151988	0,354442903564324	1	0,949	0.303976	5
DPYSL31	0.000179394	0,308485800911531	0,94	0,617	0.358788	5
EPSTI11	0.000253318	0,317317808306919	0,94	0,831	0.506635	5
GASK1B	0.000275432	0,256291167396973	0,901	0,795	0.550864	5
VIM1	0.000449848	0,343365661904157	1	0,997	0.899697	5
STAT1	0.000705108	0,387056622711555	0,967	0,866	1.41022	5
CTSL1	0.00074463	0,397018596930586	0,956	0,681	1.48926	5
ARPC1B	0.000938006	0,312301383566811	0,984	0,852	1.87601	5
PLK2	0.00124896	0,468170270007377	0,945	0,837	2.49792	5
HSD11B1	0.00187904	0,323874606970363	0,681	0,586	3.75807	5
EIF4A3	0.00402336	0,268983505658922	0,962	0,823	8.04672	5
MAFF	0.00111624	0,260045069614718	0,819	0,552	2.23248	5
TMEM176B2	0.0185778	0,366819002218	1	0,953	37.1556	5
SDK1	0.0329354	0,252464001832459	0,901	0,799	65.8709	5
TMEM176A2	0.0368694	0,392320389708608	1	0,944	73.7387	5
RGS32	0.0488675	0,339795713911173	0,978	0,846	97.7349	5
CTSD1	0.0551031	0,332185623075629	0,995	0,894	110.206	5
CH25H1	0.0577622	0,464433669755463	0,934	0,881	115.524	5
S100A61	0.0927005	0,292791781956991	1	0,98	185.401	5
JAM2	0.104537	0,317038683466721	0,885	0,833	209.075	5
TNFAIP3	0.12116	0,490544857817226	0,918	0,831	24.2321	5
ARRDC31	0.14556	0,352123772877403	0,962	0,828	29.112	5
RHOBTB3	0.203681	0,332206864396789	0,973	0,814	407.362	5
SH3BP52	0.0264534	0,333176986732829	0,956	0,885	529.068	5
NFKBIZ1	0.320326	0,468759509254969	0,934	0,866	640.651	5
A4GALT	0.382567	0,345235696278801	0,934	0,813	765.134	5
S100A112	0.634207	0,290625637041872	0,989	0,931	1268.41	5
RIPOR3	0.722493	0,262122419915577	0,923	0,835	1444.99	5
C1S3	0.80292	0,315064598761978	1	0,983	1605.84	5
SNX10	0.0977267	0,292080793930112	0,813	0,757	1954.53	5
DNAJB1	1.35781	0,493948441936311	0,934	0,857	2715.63	5
BASP12	1.669	0,256006909652629	0,995	0,928	3338	5
TIMP11	1.71374	0,530636059950866	1	0,936	3427.47	5
ANGPTL22	2.14568	0,299350074649729	0,923	0,855	4291.37	5
HNMT1	2.51081	0,346460026979267	0,907	0,8	5021.61	5
MT1X	3.13771	0,487147416424354	0,643	0,342	6275.43	5
CXCL3	3.45597	0,69137446325848	0,764	0,725	6911.94	5
LMNA	4.16255	0,33484125411677	1	0,963	8325.09	5
CTSK2	5.15945	0,311619403730389	1	0,965	10318.9	5
TNFRSF11B	6.61788	0,313241094172936	0,505	0,246	13235.8	5
MT1M	7.30608	0,420335403260474	0,753	0,544	14612.2	5
PTGS21	8.05081	0,520356811849869	0,72	0,691	16101.6	5
TMEM158	8.62307	0,300854949050575	0,813	0,673	17246.1	5
TBX33	8.67007	0,321009919600184	0,967	0,706	17340.1	5
MMP142	8.84005	0,288129592202168	0,995	0,92	17680.1	5
DUSP12	9.60349	0,366836576094741	1	0,985	19207	5
MXRA53	9.70678	0,337509186657318	0,956	0,906	19413.6	5
RAB131	10.7103	0,345972219145991	0,973	0,851	21420.6	5
GADD45A1	13.1097	0,504266257535449	0,951	0,802	26219.3	5
SVIL	13.4619	0,288632123753685	0,984	0,823	26923.9	5
CEBPB	17.7314	0,286478974183847	1	0,974	35462.7	5
DEPP1	1.91577	0,415813336826733	0,588	0,32	38315.4	5
ENO1	23.0384	0,26799264228095	0,934	0,764	46076.8	5
COL6A31	23.0982	0,250362808684933	1	0,984	46196.5	5
CD242	26.4847	0,460805881312254	0,874	0,779	52969.4	5
C15orf48	31.0262	0,288106393878495	0,67	0,591	62052.4	5
FBN12	38.3501	0,302049298254109	1	0,946	76700.1	5
TSHZ21	52.888	0,332905447218682	0,813	0,727	105776	5
FAP1	53.0163	0,256050784534383	0,912	0,886	106033	5
TYMP1	56.2678	0,293367374400256	0,989	0,962	112536	5
GADD45B	68.3081	0,476711705872429	0,945	0,79	136616	5
FSTL11	75.0292	0,254221051385463	0,995	0,967	150058	5
FBLN23	101.004	0,288854608088476	1	0,965	202008	5
TUBA1C	117.216	0,292843166373226	0,89	0,646	23443.2	5
ID1	139.355	0,514652424403992	0,808	0,552	278709	5
CSGALNACT11	147.484	0,331085645776966	0,885	0,875	294969	5
WNT5A3	278.318	0,276779676362146	0,978	0,925	556636	5
PDGFRA3	366.298	0,292323760829854	0,907	0,851	732596	5
EMILIN1	411.53	0,295763273063856	0,967	0,923	823059	5
HSPA5	829.818	0,314946600264627	0,973	0,9	1.65964e+06	5
YBX3	891.658	0,302437997837674	0,995	0,878	1.78332e+06	5
PTPRE	1747.09	0,253234492443225	0,764	0,652	3.49418e+06	5
CD300E	2768.4	0,292961395972003	0,654	0,667	5.53679e+06	5
ADM	4127.81	0,63918139484031	0,692	0,575	8.25562e+06	5
CRABP12	5581.53	0,352736391480844	0,797	0,791	1.11631e+07	5
RBP5	7305.33	0,388680214675955	0,83	0,763	1.46107e+07	5
CYP26B1	8680.43	0,352820559966506	0,786	0,578	1.73609e+06	5
PRRX21	9524.07	0,258029988592114	0,989	0,918	1.90481e+07	5
HSP90B1	12505.4	0,253985446005491	0,984	0,945	2.50109e+07	5
RAB31	14913	0,340636099587695	0,901	0,826	2.98259e+07	5
CXCL8	16445.7	129673913724396	0,654	0,623	3.28913e+07	5
PTGDS3	22127.5	0,419926633123322	0,978	0,948	4.4255e+07	5
MARCKS2	23295.2	0,257298487468439	0,989	0,962	4.65903e+07	5
METRNL1	23957.9	0,263142276981623	0,868	0,785	4.79158e+07	5
ABI3BP2	3955.06	0,291536912282834	0,808	0,714	7.91013e+07	5
SERPINH11	139965	0,256415346107493	1	0,967	2.7993e+08	5
THY11	176455	0,256614670726108	1	0,982	3.52909e+08	5
PLAU	194473	0,661256576967809	0,791	0,798	3.88946e+08	5
PIM1	30217.7	0,276046167360707	0,742	0,606	6.04353e+07	5
SAA1	306236	0,701066577957828	0,407	0,255	6.12471e+07	5
SLC1A3	430646	0,300781503871749	0,731	0,728	8.61292e+08	5
SERPINF12	45265.5	0,273084130112557	1	0,98	9.05309e+07	5
IRF1	488240	0,390721229275378	0,901	0,836	9.7648e+07	5
ELOVL2	1.17245e+06	0,316460831532738	0,659	0,652	2.34489e+09	5
KLF43	18334.5	0,253347104932732	0,874	0,882	3.6669e+09	5
GEM1	1.85887e+06	0,285962278435102	0,962	0,913	3.71774e+09	5
HES1	201968	0,30115107989929	0,769	0,55	4.03936e+08	5
TGFB31	2.96094e+06	0,281027926502483	0,841	0,685	5.92187e+09	5
IGFBP3	3.53858e+06	0,42318781129137	0,67	0,666	7.07717e+09	5
BATF	4.09822e+06	0,373728893980297	0,549	0,401	8.19644e+09	5
DDIT4	6.65975e+06	0,282655806259743	0,885	0,824	0,000133195048510856	5
IER2	7.81178e+06	0,28012572448475	0,995	0,953	0,000156235573125457	5
MASP1	1.71947e+07	0,310500667981019	0,736	0,708	0,000343893924130075	5
NRP2	3.63405e+07	0,273007281496635	0,632	0,572	0,000726810808644725	5
SPHK1	7.67985e+07	0,288206755771582	0,615	0,495	0,00153597089537047	5
TCIM	2.38228e+08	0,353188119079636	0,956	0,926	0,00476455806085085	5
CCN12	2.99374e+08	0,292606190651098	0,896	0,75	0,00598747772878311	5
CXCL143	3.35375e+08	0,385295092227468	0,896	0,758	0,00670750399858238	5
LUCAT1	2.19836e+09	0,277794599768338	0,604	0,653	0,0439671292313256	5
CHI3L2	0,000209648296241955	0,98509902113569	0,544	0,581	0,41929659248391	5
FST	0,000301495197270466	0,331510559435492	0,593	0,646	0,602990394540933	5
CXCL9	0,00117726274461181	0,672084916633835	0,577	0,676	1	5
RGS16	0,00400800877513342	0,280500831636541	0,885	0,791	1	5
HILPDA	0,00402130197408326	0,31454973226017	0,56	0,45	1	5
LAPTM5	0.00117766	112413661637145	0,931	0,408	2.35532	6
PTPRC	0.0165722	141647553572884	0,931	0,667	33.1445	6
SH3BGRL3	804.295	0,869739816560534	1	0,775	1.60859e+06	6
SRGN	3684.14	169730535091677	0,931	0,799	7.36828e+06	6
ARHGDIB2	14791.8	0,847886871791016	0,828	0,462	2.95836e+08	6
CD74	178221	257508277891634	0,931	0,88	3.56441e+08	6
KDM6B	436093	0,661590756565336	0,966	0,809	8.72186e+08	6
CD69	1.11117e+06	186582908740743	0,793	0,647	2.22234e+09	6
CD48	1.61562e+06	0,669577800818905	0,793	0,524	3.23124e+09	6
FCER1G	1.86696e+06	161939454749821	0,862	0,684	3.73391e+09	6
RAC2	5.35454e+06	102700393035527	0,724	0,365	0,000107090819771922	6
COTL1	84502	11463592631814	0,793	0,615	0,00016900395423034	6
ALOX5AP	1.09268e+07	0,932812385273857	0,759	0,611	0,000218536784078949	6
BIRC31	1.42775e+06	0,630472515256001	0,862	0,755	0,000285550554664561	6
RGS2	1.55226e+07	0,969671307163831	0,759	0,514	0,000310451610270309	6
CD55	2.02646e+07	0,666488774781057	0,724	0,408	0,000405292781299156	6
LTC4S	4.92563e+07	0,827319812668653	0,621	0,331	0,000985125406218145	6
HCLS1	5.74783e+07	0,375701720555437	0,586	0,337	0,00114956501330316	6
HLA-DMA	6.74352e+07	0,664395548868617	0,621	0,372	0,00134870317640997	6
FTH12	1.01553e+08	0,843437175287881	1	0,993	0,00203105460595614	6
CAPG	1.15495e+08	0,773994806811382	0,759	0,387	0,00230989118299659	6
KLF6	1.20198e+08	0,607443596707859	1	0,926	0,00240396778173811	6
CPA3	2.16892e+08	230389436038245	0,724	0,499	0,00433783884885248	6
TYROBP	2.19356e+08	119743006008075	0,759	0,63	0,00438711503301899	6
CD37	2.48522e+08	0,958885010397972	0,655	0,488	0,00497044045519628	6
HLA-DRB1	5.15321e+08	24741544070143	0,793	0,744	0,0103064100549069	6
ACTB	6.69092e+08	0,497063876165663	1	0,979	0,0133818445691974	6
EVI2B	8.16425e+08	0,503206867175397	0,724	0,566	0,0163285004993766	6
STK17B	8.37706e+08	0,542415510263466	0,897	0,818	0,016754110020807	6
HLA-DPA1	8.80431e+08	19620020534126	0,724	0,624	0,0176086249349744	6
RGS1	1.19886e+09	10871178156314	0,759	0,672	0,0239772168249811	6
TPSAB1	1.33984e+09	203781699238071	0,724	0,459	0,0267967978076982	6
ITGB2	1.48714e+09	0,584893862310501	0,69	0,591	0,0297427180128101	6
PLAUR	1.49502e+09	0,879144939869816	0,828	0,785	0,0299004161396611	6
SERPINB1	2.08745e+09	0,61350004432319	0,793	0,68	0,0417489002850356	6
DUSP2	2.57021e+09	0,926810549255433	0,69	0,553	0,0514042951858172	6
CD83	2.65991e+09	0,957962935975218	0,724	0,728	0,0531981388365926	6
MS4A2	2.81197e+08	135811719266294	0,586	0,333	0,056239415291126	6
GPSM3	2.91397e+09	0,355226917663435	0,724	0,545	0,0582794088828027	6
IL1RL1	3.15641e+09	0,614249571507921	0,655	0,49	0,0631282333729716	6
FGL21	4.02213e+09	142064423691853	0,552	0,331	0,0804426594001244	6
REL	4.79105e+09	0,73671299756944	0,69	0,512	0,0958209083881109	6
ADCYAP1	4.83509e+09	110232473159528	0,586	0,359	0,0967017518653177	6
HLA-DMB	5.42112e+09	0,451634311813064	0,448	0,26	0,10842241522812	6
HLA-DPB1	5.59698e+09	206961708779961	0,759	0,762	0,111939564456229	6
LCP1	5.76349e+09	0,817856143691817	0,655	0,605	0,115269828811178	6
CLU2	5.78202e+09	0,68604063319703	0,862	0,842	0,115640485361174	6
ANXA12	6.2889e+09	0,652657940155632	0,966	0,927	0,125778089677777	6
H2AFZ	6.49997e+09	0,621642187116917	0,897	0,835	0,129999496636182	6
TPSB2	6.74217e+09	370139077480478	0,724	0,532	0,134843491458653	6
AREG	7.29178e+07	146368545377854	0,586	0,418	0,14583566210442	6
SAMSN1	8.1061e+07	106738192121807	0,69	0,631	0,16212208342698	6
C1orf162	9.48431e+09	0,54768483283604	0,586	0,408	0,189686167728507	6
TNFSF10	9.60166e+09	0,724606043702386	0,828	0,678	0,192033269568383	6
ALDH1A1	0,000158309681546129	0,602896259624386	0,448	0,221	0,316619363092258	6
ALOX5	0,00017333921276162	0,298902505875876	0,655	0,461	0,34667842552324	6
LSP1	0,000178788181785292	0,407812804723576	0,483	0,301	0,357576363570583	6
S100A102	0,000192589121269135	0,569944602428811	0,966	0,949	0,38517824253827	6
NCF1	0,00019663839848822	0,337232074594322	0,586	0,497	0,39327679697644	6
ARPC1B1	0,000196893888477892	0,688734970524063	0,862	0,868	0,393787776955784	6
CKLF	0,000198915714694138	0,598575185966952	0,759	0,705	0,397831429388275	6
HLA-DQA1	0,000227289581250556	175493469275221	0,69	0,669	0,454579162501112	6
CD2	0,000257665803160775	0,484666527850035	0,276	0,165	0,515331606321549	6
SGK1	0,000350480442789366	0,467008825229137	0,724	0,587	0,700960885578732	6
CYBA	0,000407949021022234	0,382755498701041	0,897	0,965	0,815898042044467	6
NR4A2	0,000522965202072289	0,556481725226338	0,828	0,756	1	6
HLA-DQB1	0,000616333879730197	138642048645256	0,724	0,699	1	6
FAM107B	0,000886070213612501	0,343624888405455	0,724	0,512	1	6
CORO1A	0,000980075598050548	0,716527002284929	0,621	0,617	1	6
CKS2	0,00107946809479826	0,31900416009391	0,586	0,443	1	6
LIMD2	0,00116378174888266	0,257528601443237	0,759	0,661	1	6
VWA5A	0,00149852991621203	0,676418066757287	0,828	0,727	1	6
ZNF331	0,00154192950184627	0,416704539952793	0,759	0,691	1	6
RGCC1	0,00173085202319225	0,488728729231844	0,759	0,757	1	6
S100A41	0,00173814078052189	0,473028336897965	1	0,959	1	6
LAT	0,00176944083208727	0,430850384652026	0,517	0,345	1	6
DNAJB11	0,00180610086094037	0,279368996885599	0,966	0,864	1	6
NFKBIA2	0,00186488306715053	0,54472161261554	0,966	0,851	1	6
TNFAIP31	0,00188419407733406	0,47736023744363	0,862	0,84	1	6
CD53	0,00191928638431376	0,588991832813361	0,586	0,594	1	6
HCST	0,00192279789222936	0,537516571188458	0,655	0,66	1	6
ARL4C1	0,00202177317283312	0,562551480223918	0,69	0,702	1	6
TMSB4X	0,00213855082772684	0,583481043230737	1	0,973	1	6
HLA-DRA	0,0021888343808968	235112705473431	0,759	0,836	1	6
CD52	0,0022324446949834	117084512550643	0,621	0,675	1	6
CIITA	0,00230142266596964	0,329560088398094	0,552	0,487	1	6
AP1S2	0,00234356967340272	0,438914322875278	0,621	0,512	1	6
SAT11	0,00265703923300869	0,421187114612526	1	0,957	1	6
PPT1	0,0026924853768618	0,567558232415911	0,69	0,532	1	6
ANP32E	0,0027122057267755	0,288512385364519	0,759	0,612	1	6
IRF11	0,00295255745504706	0,316937653680247	1	0,84	1	6
CST31	0,00320339811014557	0,389705142084425	1	0,993	1	6
IQGAP2	0,00357855552291114	0,329658611102781	0,483	0,385	1	6
NAAA	0,00656670278241579	0,297998062592322	0,552	0,434	1	6
STMN1	0,00660821697692987	0,599084098363226	0,517	0,389	1	6
RGS10	0,00748371091873256	0,397796238065359	0,724	0,665	1	6
CD9	0,00751089966302836	0,696713146957504	0,897	0,833	1	6
CLEC2B	0,00911222474812	0,348808755762862	0,724	0,673	1	6
GK	0,00947181926346424	0,335118863102	0,483	0,41	1	6
SLC18A2	0,00988922158792428	0,901542531159169	0,621	0,615	1	6

## Sheet: Epithelial re-clustering
gene	p_val	avg_logFC	pct.1	pct.2	p_val_adj	cluster
CXCL14	2.26481e-219	14291443129636	1	0,821	4.52962e-216	0
HOPX	1.02915e-126	0,826314234010062	0,982	0,734	2.05831e-123	0
DST	1.12146e-124	0,85880505765267	1	0,883	2.24292e-121	0
GEM	6.93799e-118	0,872752310837177	0,989	0,915	1.3876e-113	0
KRT14	1.52593e-114	0,790638335298206	1	0,939	3.05186e-111	0
THBS1	4.14966e-104	0,301539863189196	0,977	0,833	8.29933e-101	0
SNCA	1.70533e-94	0,313682983747993	0,967	0,727	3.41066e-91	0
DCN	1.80562e-93	0,847757009570709	0,989	0,784	3.61125e-90	0
CCL2	6.15236e-91	0,844953625016619	0,971	0,705	1.23047e-86	0
PHLDA1	3.72753e-86	0,40667990863642	0,974	0,946	7.45506e-84	0
SPINK2	4.40482e-85	0,274712371217089	0,964	0,923	8.80963e-82	0
IFITM3	2.38031e-82	0,631749516640439	1	0,865	4.76062e-79	0
TXNIP	2.10614e-76	0,57977748617632	0,979	0,689	4.21229e-73	0
CXCL2	2.27401e-75	0,371761633320119	0,888	0,811	4.54802e-72	0
CTNNAL1	4.09099e-75	0,654781243924916	0,956	0,664	8.18197e-72	0
TSC22D1	4.62649e-73	0,853106390847308	0,982	0,758	9.25297e-70	0
DAPL1	1.75713e-72	0,623344207158737	0,946	0,664	3.51425e-69	0
KRT19	8.0576e-72	0,395382956653191	0,954	0,92	1.61152e-69	0
PTHLH	5.65896e-71	0,337776011664232	0,927	0,5	1.13179e-68	0
CCN1	1.98566e-67	0,623570165326937	0,894	0,658	3.97131e-64	0
CD9	9.5721e-67	0,493416256515501	0,998	0,853	1.91442e-64	0
MYC	6.24808e-67	0,586891035300164	0,997	0,779	1.24962e-62	0
JDP2	3.98926e-64	0,49928820948556	0,862	0,497	7.97853e-61	0
CBR1	4.09654e-63	0,492961833640293	0,99	0,767	8.19307e-60	0
CITED2	9.24106e-63	0,395513669227635	0,95	0,724	1.84821e-59	0
NCOA7	1.87551e-61	0,572366150787447	0,993	0,818	3.75101e-58	0
ETS2	2.47127e-61	0,586212681647269	0,945	0,737	4.94255e-58	0
RND3	8.48829e-61	0,655178033011654	0,974	0,749	1.69766e-57	0
CEBPD	4.24002e-58	0,69010382640087	0,99	0,786	8.48003e-55	0
COL17A1	1.53648e-57	0,486207917414954	1	0,836	3.07296e-55	0
KRTCAP3	3.62612e-54	0,288011143583248	0,95	0,565	7.25223e-52	0
SFRP1	1.48185e-53	0,513568822412918	0,859	0,511	2.96369e-50	0
SERPINE2	1.10788e-52	0,36828163760847	0,984	0,821	2.21577e-49	0
PAPPA	3.59927e-52	0,315582502624389	0,982	0,826	7.19854e-49	0
LGALS3	5.68405e-52	0,389783214365693	0,992	0,813	1.13681e-49	0
PTN	1.1333e-51	0,396856108603574	0,984	0,726	2.2666e-48	0
GAS1	1.3575e-51	0,518820950071123	0,844	0,542	2.71501e-48	0
BOC	8.04046e-51	0,434568645085428	0,893	0,571	1.60809e-47	0
POU3F1	8.35946e-49	0,357329652234651	0,764	0,408	1.67189e-45	0
MIR99AHG	1.30632e-48	0,302880942368392	0,912	0,53	2.61265e-45	0
IGFBP5	2.04636e-46	0,598247959068863	1	0,809	4.09272e-43	0
PERP	2.04874e-44	0,341670511896351	1	0,876	4.09748e-41	0
CCN2	3.46947e-43	0,253880671619914	0,758	0,545	6.93893e-40	0
CAV2	1.75025e-41	0,365393311230236	0,964	0,669	3.50051e-38	0
DUSP1	1.68315e-40	0,557121013613541	0,979	0,891	3.3663e-37	0
CACNB4	4.80457e-40	0,322906992056332	0,987	0,674	9.60914e-37	0
APP	5.22934e-40	0,404633292899577	0,987	0,688	1.04587e-36	0
SELENOP	1.35295e-38	0,364535280900182	0,967	0,656	2.7059e-35	0
DKK3	2.79537e-38	0,321869868237267	0,87	0,581	5.59074e-35	0
KLF4	4.9779e-36	0,527767439852519	0,881	0,714	9.9558e-33	0
NBL1	6.35783e-36	0,349613256630416	0,831	0,539	1.27157e-31	0
CAV1	1.50648e-34	0,404484233585476	0,979	0,718	3.01295e-31	0
AKR1C1	1.53684e-34	0,379318573383795	0,733	0,395	3.07368e-32	0
KRT5	2.55496e-34	0,255207895836017	1	0,914	5.10992e-31	0
C1R	2.72027e-34	0,278884537121546	0,946	0,616	5.44054e-31	0
EGR1	6.6278e-34	0,378740255477082	0,976	0,853	1.32556e-30	0
PMAIP1	4.79779e-31	0,309992556133707	0,922	0,639	9.59559e-28	0
PDLIM4	5.10252e-31	0,294112544921029	0,88	0,607	1.0205e-27	0
IFI27	7.26061e-31	0,376159864380754	0,956	0,756	1.45212e-27	0
RAPGEF5	9.49116e-29	0,347843045075014	0,837	0,612	1.89823e-25	0
IL18	9.46e-27	0,367635319410373	0,81	0,546	1.892e-23	0
SVIL	1.08594e-26	0,280938190047736	0,989	0,708	2.17187e-23	0
CAVIN1	1.19206e-26	0,321312619913774	0,94	0,683	2.38411e-23	0
ARL4A	1.77746e-26	0,323651965801009	0,924	0,651	3.55493e-23	0
PTMS	2.6491e-25	0,306251751368624	0,951	0,756	5.29819e-23	0
NFIC	1.2547e-24	0,303067870885562	0,93	0,806	2.5094e-21	0
LIMA1	1.70899e-25	0,323893183950681	0,935	0,708	3.41798e-20	0
WLS	2.07672e-22	0,280614239995824	0,74	0,532	4.15344e-19	0
ATF3	5.75861e-23	0,588983719127431	0,872	0,759	1.15172e-18	0
HSPA2	1.55789e-20	0,294627153340094	0,813	0,559	3.11578e-17	0
PHGDH	1.72311e-20	0,257851212110407	0,754	0,471	3.44622e-17	0
GPNMB	2.45176e-21	0,289740152622838	0,753	0,529	4.90352e-18	0
IGFBP2	1.22022e-19	0,337666970577954	0,951	0,761	2.44044e-16	0
NFIX	1.2512e-18	0,280828262105732	0,865	0,669	2.50239e-15	0
LMNA	2.44225e-18	0,270200870363594	0,998	0,925	4.8845e-15	0
IER2	3.11536e-18	0,25272591354462	0,977	0,954	6.23072e-15	0
PDLIM1	1.79014e-16	0,276300120784449	0,898	0,692	3.58028e-13	0
SELENOM	1.09804e-15	0,25433277589212	0,948	0,867	2.19609e-11	0
C19orf33	1.05454e-13	0,27222397177966	0,751	0,483	2.10908e-10	0
SOX4	4.81089e-12	0,315534169601639	0,855	0,705	9.62177e-09	0
ID1	4.92417e-12	0,379707143804247	0,875	0,716	9.84833e-09	0
CKB	1.89094e-07	0,27228726330214	0,694	0,446	0.000378188	0
ARL4D	3.50562e-07	0,262082620262368	0,719	0,494	7.01124e-05	0
AREG	0.274504	0,446737026449274	0,715	0,612	549.008	0
SULF1	4.34997e-60	0,373214430520208	0,976	0,918	8.69994e-57	1
WWTR1	2.90307e-47	0,277919499726234	0,971	0,797	5.80613e-44	1
ADAMTS1	4.3672e-42	0,345083147096142	0,965	0,735	8.73439e-39	1
MMP14	4.02598e-37	0,337253603228995	0,968	0,889	8.05197e-34	1
ABCA1	7.41423e-34	0,373703737855422	0,965	0,727	1.48285e-29	1
KIAA1217	1.60347e-30	0,557022431097957	0,979	0,628	3.20695e-27	1
GPR68	1.71718e-26	0,355619235323384	0,973	0,911	3.43436e-23	1
THBS11	2.56268e-25	0,473637629608508	0,976	0,852	5.12535e-22	1
MEG3	2.33382e-23	0,55995694710479	0,971	0,828	4.66764e-20	1
CNTNAP3B	4.36097e-21	0,306722763099024	0,603	0,317	8.72194e-18	1
DDR1	6.60612e-19	0,57798342853212	0,941	0,681	1.32122e-15	1
COL17A11	1.49702e-18	0,461342124917832	0,954	0,866	2.99404e-15	1
CDH1	4.95776e-18	0,258203744919859	0,627	0,3	9.91552e-15	1
DST1	6.39374e-17	0,463400521392797	0,971	0,903	1.27875e-13	1
PAPPA1	1.30716e-15	0,560742914180498	0,981	0,846	2.61432e-12	1
RNF152	2.11473e-14	0,33854747306254	0,812	0,629	4.22946e-12	1
SH3PXD2A	1.55548e-10	0,548228645385228	0,952	0,749	3.11097e-07	1
OSMR	4.38085e-10	0,302316602806058	0,836	0,556	8.76171e-07	1
CFH	5.35302e-09	0,51800482387117	0,962	0,804	1.0706e-05	1
NRG1	5.88012e-07	0,253049451160908	0,879	0,669	0.00117602	1
SYNE2	3.962e-06	0,486652701821397	0,901	0,891	0.007924	1
DSP	4.87741e-06	0,516163345734949	0,952	0,886	0.00975483	1
CACNB41	9.38825e-06	0,431786361518939	0,912	0,729	0.00187765	1
AC020916.1	1.06802e-05	0,389531851501634	0,979	0,852	0.0213603	1
NFIA	3.14041e-05	0,427302603200429	0,885	0,706	0.00628082	1
SLC7A1	0.000103884	0,426187433969225	0,901	0,752	0.207769	1
EGFR	0.0001449	0,508313840356728	0,724	0,685	0.2898	1
PTPRF	0.000154333	0,39914604248435	0,89	0,714	0.308667	1
LRP1	0.000363813	0,274826372698735	0,775	0,563	0.727626	1
PHLDA11	0.000628883	0,310183259270816	0,976	0,95	1.25777	1
JAG1	0.0034881	0,500806185753778	0,903	0,808	6.9762	1
SOS1	0.0129338	0,337448301372898	0,863	0,756	25.8676	1
THSD4	5.48092	0,40763890103517	0,971	0,837	10961.8	1
PLA2R1	10.4072	0,40834552388893	0,654	0,467	20814.4	1
HNRNPU	64.636	0,334122822297003	0,906	0,919	129272	1
SERPINE21	70.4591	0,363937384099024	0,979	0,843	140918	1
SLC1A3	432.429	0,337673994698392	0,869	0,686	864858	1
ITGA6	587.68	0,409519168837626	0,743	0,727	1.17536e+07	1
NFIB	9748.35	0,32747216456587	0,885	0,734	194967	1
GCLC	14971	0,388387749135861	0,971	0,784	2.9942e+07	1
ZFP36L1	36582.1	0,39746456559054	0,941	0,932	7.31643e+07	1
LAMB3	76933.2	0,440800673454316	0,922	0,784	1.53866e+08	1
RND31	110543	0,409167581745782	0,818	0,808	2.21086e+08	1
SLC16A1	114302	0,303555599217514	0,946	0,855	2.28603e+08	1
BOC1	131842	0,356328545084872	0,694	0,651	2.63683e+08	1
KCNQ1OT1	2.0053e+07	0,257297348351768	0,903	0,755	0,000401059605466696	1
IGFBP51	4.45423e+07	0,320117063491383	0,965	0,84	0,000890845761185499	1
ITGB4	8.75056e+07	0,356752381935413	0,579	0,604	0,00175011171160367	1
KLF5	1.36052e+08	0,346679061983337	0,678	0,668	0,00272104438795137	1
PTPN13	1.37545e+08	0,290380417464171	0,74	0,729	0,00275090842225184	1
GLUL	3.87258e+07	0,258167139007562	0,979	0,934	0,00774516686272339	1
ST5	1.77057e+09	0,3218500963373	0,847	0,754	0,0354114029847264	1
LDLR	3.66416e+09	0,271138905402654	0,78	0,707	0,0732831894979829	1
ITGA2	0,000117581217785351	0,276703727221291	0,694	0,672	0,235162435570701	1
MAF	0,000201506071649322	0,258368703990947	0,66	0,714	0,403012143298645	1
STON2	0,000201837122349221	0,251452789179114	0,638	0,573	0,403674244698442	1
BCL11B	0,000319789899565272	0,334310140349854	0,67	0,66	0,639579799130544	1
SLC12A2	0,000388134125657163	0,255904041193722	0,812	0,799	0,776268251314326	1
ITGB8	0,00114776031677105	0,273003639659261	0,582	0,541	1	1
GJA1	0,0016718195261361	0,318062787705605	0,705	0,706	1	1
SAA1	3.19399e-127	0,542891424338429	0,989	0,913	6.38798e-125	2
FDCSP	4.41794e-90	268981036856245	0,989	0,927	8.83588e-87	2
PDPN	1.44882e-86	0,426140215572545	0,984	0,748	2.89765e-83	2
TNFRSF21	2.12082e-83	0,47549781924645	1	0,783	4.24165e-80	2
PMEPA1	1.97728e-82	0,550984238011727	1	0,936	3.95456e-79	2
S100A2	2.38107e-82	0,751456375875557	1	0,895	4.76213e-79	2
TNFRSF12A	1.03558e-72	0,710072800542975	0,967	0,723	2.07116e-69	2
ATP1B1	1.20094e-71	0,348615053811495	0,978	0,626	2.40187e-68	2
FXYD3	8.93619e-70	0,672482286284203	1	0,748	1.78724e-66	2
S100A9	4.27367e-63	0,359707741835035	0,989	0,829	8.54734e-60	2
S100A11	3.30666e-62	0,517080754674855	1	0,89	6.61331e-59	2
TNC	2.87253e-61	0,391492503832846	0,978	0,803	5.74505e-58	2
S100A10	2.62636e-59	0,514424114490426	1	0,914	5.25273e-56	2
GJB2	1.71127e-57	0,369090263510404	0,989	0,682	3.42254e-55	2
SFN	2.2837e-52	0,528801365244944	0,997	0,883	4.5674e-49	2
MT2A	4.80417e-52	0,811973666283313	0,995	0,862	9.60835e-49	2
PKM	1.00265e-51	0,515309141597944	0,997	0,839	2.0053e-48	2
MT1E	1.48239e-49	0,615252238824495	0,984	0,686	2.96478e-46	2
IGFBP6	2.56861e-49	0,432378700661548	0,891	0,375	5.13721e-46	2
PHLDA3	8.71415e-49	0,370665802455904	0,997	0,631	1.74283e-45	2
FHL2	1.43793e-47	0,454573016028336	0,905	0,512	2.87585e-43	2
IFITM31	1.56076e-46	0,59123207615711	1	0,883	3.12151e-43	2
BHLHE41	5.15646e-46	0,266127980279266	0,992	0,872	1.03129e-42	2
HTRA1	5.66078e-45	0,351502886023575	0,946	0,469	1.13216e-42	2
KRT191	3.13782e-44	101566827641168	0,992	0,917	6.27564e-40	2
S100A6	5.83853e-43	0,485636445353829	1	0,921	1.16771e-39	2
CXCL1	7.49649e-43	0,408105435634236	0,959	0,845	1.4993e-39	2
ENO1	1.37686e-39	0,442485882079445	0,997	0,851	2.75371e-36	2
LGALS3BP	1.95534e-38	0,470211232171724	0,978	0,689	3.91068e-35	2
CAV11	5.53056e-37	0,512272130754113	0,995	0,749	1.10611e-33	2
PDLIM11	2.13325e-34	0,427303655669489	0,973	0,704	4.2665e-31	2
IGFBP7	9.85099e-34	0,318211007340623	0,997	0,845	1.9702e-30	2
C12orf75	3.1e-34	0,583978940142377	0,997	0,913	6.19999e-30	2
ATOX1	3.22382e-32	0,269777376531374	0,97	0,576	6.44764e-29	2
GSTP1	3.62215e-32	0,357110502271021	1	0,855	7.24429e-29	2
ST51	9.90481e-32	0,308549802208569	0,986	0,728	1.98096e-28	2
ACTN1	1.54158e-31	0,328903100194827	0,989	0,78	3.08316e-28	2
GAPDH	2.0614e-30	0,384712369236591	1	0,953	4.1228e-27	2
LY6E	4.83067e-30	0,42592839843509	1	0,893	9.66134e-27	2
CD91	6.13002e-30	0,450824861630807	0,997	0,872	1.226e-26	2
APP1	6.30052e-29	0,462304013362246	1	0,724	1.2601e-25	2
SPARCL1	1.22261e-28	0,286670339328812	0,976	0,725	2.44521e-25	2
FSCN1	1.51261e-27	0,256489720906293	0,981	0,716	3.02522e-25	2
BST2	7.25266e-27	0,416091333053063	0,997	0,961	1.45053e-23	2
NRP2	1.15502e-24	0,313642855083847	0,973	0,715	2.31003e-21	2
LAPTM4B	5.10039e-24	0,302447435638006	0,916	0,588	1.02008e-20	2
ANXA2	3.70819e-24	0,28543549467927	1	0,888	7.41638e-21	2
ODC1	4.82219e-22	0,316403795218565	0,962	0,867	9.64438e-19	2
GPC1	5.25078e-22	0,297904678256522	0,883	0,536	1.05016e-18	2
CAVIN11	1.96428e-21	0,361315447437914	0,97	0,71	3.92855e-18	2
RAB13	2.65526e-21	0,342695105692511	0,932	0,818	5.31052e-18	2
LAMB31	1.00223e-20	0,443679049766986	0,992	0,771	2.00446e-17	2
IGFBP21	3.56412e-20	0,444891587264404	0,976	0,781	7.12824e-17	2
PPP1R14B	6.60304e-20	0,321028784246331	0,984	0,783	1.32061e-16	2
KRTCAP31	9.50047e-20	0,252238244603098	0,921	0,62	1.90009e-17	2
IFNGR1	9.61394e-21	0,254764531014494	0,984	0,812	1.92279e-16	2
S100A16	2.01916e-19	0,296160606996567	0,989	0,736	4.03831e-16	2
CTSB	1.3159e-16	0,350159201162531	0,981	0,853	2.63179e-13	2
KRT141	1.53228e-16	0,383085800436092	1	0,947	3.06456e-13	2
CTSD	1.65732e-16	0,266186261296103	0,967	0,792	3.31465e-13	2
YBX3	4.68719e-16	0,315670960134746	0,981	0,835	9.37438e-13	2
BCAM	1.22714e-15	0,251803398310788	0,745	0,354	2.45427e-12	2
TNFSF10	6.18979e-15	0,447214424400117	0,997	0,87	1.23796e-11	2
CEBPB	2.91697e-14	0,30806743350682	0,995	0,903	5.83394e-11	2
TYMP	1.89092e-14	0,450379996283194	1	0,97	3.78183e-10	2
C1R1	5.02375e-13	0,299399077033909	0,886	0,671	1.00475e-08	2
SOD2	1.30152e-11	0,393936661053866	0,957	0,852	2.60305e-08	2
ITGA61	3.63339e-11	0,263259800603765	0,951	0,687	7.26677e-08	2
PRSS23	1.22269e-09	0,263306237722689	0,848	0,794	2.44539e-06	2
IFI271	6.36471e-07	0,302976573721648	0,948	0,784	0.00127294	2
CBR11	2.67892e-06	0,256297098158131	0,973	0,799	0.00535785	2
CLEC2B	0.00826232	0,265743880187371	0,823	0,63	16.5246	2
LUM	0.00193071	0,287226974743883	0,807	0,65	38.6142	2
IGHG4	1.12012e-132	108121382930396	0,983	0,905	2.24024e-129	3
IGHG2	4.9321e-132	0,496751789580071	0,987	0,963	9.8642e-129	3
MZB1	1.97001e-130	0,766480739961706	0,987	0,91	3.94001e-127	3
AC004687.1	1.19461e-127	0,467238776192297	0,987	0,92	2.38921e-124	3
IGLC2	7.9006e-124	111373513691882	0,993	0,955	1.58012e-120	3
IGKC	7.45811e-123	192162099074178	1	0,999	1.49162e-120	3
CD79A	8.06382e-120	0,478126236540137	0,98	0,89	1.61276e-116	3
FCRL5	3.14486e-116	0,303440690849059	0,967	0,862	6.28972e-113	3
IGHG3	9.4598e-113	0,837786372967364	0,983	0,912	1.89196e-109	3
IGHG1	1.4558e-112	0,369581375266367	0,99	0,949	2.91159e-109	3
DERL3	4.49529e-107	0,296391230884935	0,98	0,91	8.99058e-104	3
TENT5C	2.5158e-100	0,509804695150417	0,983	0,909	5.03161e-97	3
ISG20	1.79722e-100	0,252976819228553	0,983	0,902	3.59444e-97	3
AC007952.4	2.03834e-98	0,618070834377428	0,993	0,672	4.07668e-95	3
KLF2	8.597e-96	0,908231816969722	0,987	0,935	1.7194e-92	3
ANKRD28	1.11819e-93	0,670632880929394	0,987	0,825	2.23639e-90	3
ZEB2	6.39084e-92	0,64863162425296	0,987	0,656	1.27817e-88	3
MEF2C	4.50086e-88	0,357338750741521	0,964	0,87	9.00172e-85	3
POU2F2	1.41765e-84	0,337145977572872	0,967	0,923	2.8353e-81	3
TNF	1.59307e-85	0,27146450300043	0,964	0,783	3.18615e-81	3
HES4	2.34918e-84	0,338374156159979	0,983	0,522	4.69837e-81	3
CD83	2.50528e-84	0,436800805131139	0,99	0,868	5.01055e-81	3
CXCR4	1.00616e-81	0,271963945438163	0,99	0,927	2.01231e-78	3
SLC2A3	5.07568e-81	0,501287721543915	0,993	0,731	1.01514e-77	3
NTM	1.5532e-78	0,382919897803557	0,947	0,773	3.1064e-75	3
RGS1	1.38928e-77	0,368654148522101	0,967	0,923	2.77856e-74	3
ARHGAP29	1.71608e-74	0,267949896571015	0,762	0,136	3.43215e-71	3
RGS2	4.34054e-71	0,337624854913193	0,987	0,772	8.68109e-68	3
ITM2C	1.34609e-69	0,269511892724569	0,987	0,888	2.69219e-66	3
CCDC144A	1.39226e-58	0,338607280348756	0,891	0,303	2.78452e-55	3
XBP1	1.51449e-58	0,425265846435501	0,983	0,942	3.02898e-55	3
KDM6B	3.72021e-47	0,397288111019874	0,99	0,881	7.44042e-44	3
CD55	7.49362e-44	0,688608960505333	0,97	0,681	1.49872e-40	3
DMXL2	4.04006e-42	0,268318344273554	0,891	0,65	8.08012e-39	3
GRASP	1.32413e-41	0,301864786570473	0,95	0,71	2.64826e-38	3
DUSP2	1.68695e-38	0,303647617819601	0,983	0,908	3.3739e-35	3
PPP1R15B	3.07798e-38	0,331693701522077	0,977	0,819	6.15596e-35	3
NFKBIZ	2.17165e-37	0,613274077454024	0,987	0,88	4.3433e-34	3
MIAT	6.12838e-36	0,364397161985932	0,887	0,894	1.22568e-32	3
ETS1	9.26149e-36	0,292217448382667	0,974	0,906	1.8523e-32	3
BIRC3	7.67156e-35	0,369576609419705	0,983	0,882	1.53431e-31	3
SEC11C	1.19133e-33	0,268519566750988	0,983	0,856	2.38266e-29	3
ABHD5	1.14545e-21	0,314080036346769	0,977	0,578	2.29089e-18	3
NABP1	1.28486e-18	0,356078011648585	0,964	0,8	2.56973e-15	3
CNTNAP3B1	9.28714e-18	0,288876665175248	0,222	0,385	1.85743e-14	3
PCSK1N	1.94274e-12	0,389600285943172	0,033	0,264	3.88547e-10	3
HERPUD1	6.46502e-11	0,496457839683352	0,993	0,906	1.293e-07	3
WEE1	8.47159e-05	0,27106388086468	0,348	0,805	0.169432	3
SSR4	4.75691e-05	0,4818907803431	0,987	0,949	0.0951383	3
PLA2R11	0.152885	0,264744841850834	0,232	0,538	305.77	3
TSHZ2	5.42934	0,309701912650922	0,242	0,547	10858.7	3
KLF6	51251.8	0,637050265205181	0,98	0,988	1.02504e+07	3
SHTN1	7.15491e+06	0,312368148263218	0,642	0,476	0,000143098296663282	3
EHMT1	1.05215e+08	0,339981553749891	0,924	0,678	0,00210430311169246	3
FRMD4B	1.81072e+08	0,253308145156126	0,281	0,502	0,00362144915867384	3
DUSP6	0,000398453010186486	0,324614146350679	0,98	0,913	0,796906020372973	3
AL359220.1	0,00276698319883987	0,258584197082708	0,417	0,33	1	3
KCNJ2	0,00704390750030888	0,253445341307263	0,56	0,405	1	3
CD24	1.41124e-76	126693146128213	0,97	0,79	2.82248e-73	4
KRT51	4.04975e-74	117427326795895	1	0,931	8.0995e-71	4
S100A111	1.00367e-69	120252323870463	1	0,898	2.00733e-66	4
S100A91	5.01653e-65	274573290783817	0,985	0,842	1.00331e-61	4
FDCSP1	5.28947e-63	100772244946188	0,946	0,936	1.05789e-59	4
FABP5	9.10502e-63	255325701554585	0,936	0,675	1.821e-59	4
S100A8	3.49626e-62	276762024613828	0,975	0,722	6.99252e-59	4
CLDN7	1.55098e-60	0,504671295188989	0,921	0,773	3.10195e-57	4
SFN1	3.7655e-59	107162898184628	0,99	0,893	7.53101e-56	4
ANXA21	4.50092e-57	0,948126517039641	0,98	0,899	9.00184e-54	4
S100A101	1.41812e-53	0,906489967196519	1	0,921	2.83624e-50	4
GSTP11	8.06571e-50	0,894006735216158	0,965	0,87	1.61314e-47	4
TMEM45A	1.61242e-48	0,370996533869508	0,936	0,615	3.22485e-45	4
TXN	4.30604e-47	120363305506652	0,946	0,82	8.61208e-44	4
S100A161	9.18094e-48	0,935723106016977	0,965	0,759	1.83619e-43	4
GJB21	5.59322e-46	0,953632324487298	0,975	0,708	1.11864e-42	4
MT1X	9.75622e-46	126336229687017	0,941	0,705	1.95124e-42	4
S100A21	1.31757e-43	107329717160758	0,99	0,904	2.63513e-40	4
NOTCH3	3.51703e-35	0,362126023878053	0,782	0,16	7.03407e-32	4
CTSL	1.78668e-33	0,301125678807579	0,911	0,892	3.57337e-30	4
PERP1	1.15246e-29	0,705969011214209	0,97	0,904	2.30492e-26	4
SERPINB1	1.43385e-29	110306110985523	0,95	0,684	2.86771e-26	4
ANKRD37	2.21909e-29	0,458425656567832	0,96	0,589	4.43819e-26	4
S100A61	4.54303e-26	107085680020128	1	0,927	9.08606e-23	4
AQP3	3.09928e-25	0,867596926370266	0,921	0,773	6.19856e-22	4
IL1RN	3.69678e-23	0,501371155974135	0,871	0,405	7.39355e-20	4
ANXA1	6.00008e-23	0,762823892597626	0,99	0,917	1.20002e-19	4
COPZ2	4.48287e-22	0,41788121590195	0,931	0,444	8.96574e-19	4
KRT142	1.23833e-21	0,654503782918674	1	0,951	2.47665e-18	4
GAPDH1	5.9278e-20	0,491883716225952	1	0,957	1.18556e-16	4
TUBA1C	5.61849e-19	0,920439839161173	0,985	0,852	1.1237e-15	4
FSCN11	7.1633e-19	0,685444412003019	0,98	0,737	1.43266e-15	4
PHLDA31	1.28268e-18	0,524852343214481	0,965	0,663	2.56535e-15	4
ENO11	1.74115e-17	0,537437124598687	0,985	0,864	3.48229e-14	4
TUBA4A	1.31038e-16	0,67823051271577	0,921	0,622	2.62077e-13	4
PTPRF1	1.52395e-16	0,464545823979854	0,96	0,722	3.0479e-13	4
PKM1	9.50244e-13	0,553045412001124	0,975	0,854	1.90049e-09	4
PFN1	3.4873e-12	0,398311933202541	0,98	0,918	6.97461e-09	4
HMGB1	9.11126e-13	0,436284629934178	0,995	0,955	1.82225e-08	4
IFI272	1.45295e-12	0,751379634780928	0,916	0,8	2.9059e-09	4
SH3BGRL3	3.37623e-11	0,521084386187459	0,965	0,908	6.75246e-08	4
CCDC34	5.84347e-11	0,30646731596227	0,713	0,296	1.16869e-07	4
ACTG1	1.56773e-10	0,474104460464574	1	0,96	3.13546e-07	4
HES1	5.86928e-10	0,853861692239875	0,827	0,622	1.17386e-07	4
CRYAB	2.04421e-09	0,358760867490724	0,688	0,251	4.08841e-06	4
EFHD2	2.05282e-08	0,280301951432579	0,941	0,829	4.10565e-05	4
TMSB10	4.38411e-08	0,308983774967133	0,995	0,976	8.76822e-05	4
CCND1	8.59983e-08	0,525759768209682	0,965	0,736	0.000171997	4
SPON2	2.78386e-07	0,350311243142771	0,658	0,332	0.000556773	4
SELENOP1	8.05392e-09	0,580890091911227	0,955	0,719	0.000161078	4
KRT17	1.41906e-05	0,596263671203086	0,673	0,408	0.0283812	4
TACSTD2	6.48068e-06	0,6426086284717	0,802	0,609	0.0129614	4
PRXL2A	7.65171e-05	0,537975279503832	0,822	0,608	0.153034	4
JUP	0.000122841	0,539658482998685	0,832	0,646	0.0245681	4
RHOD	0.000298665	0,387845092687878	0,678	0,442	0.597331	4
HSPB1	0.000525741	0,547549670146402	0,931	0,853	1.05148	4
MT2A1	0.00211603	0,570109042562862	0,97	0,875	4.23206	4
LYPD3	0.00718945	0,508922281827628	0,921	0,701	14.3789	4
KRT1	0.0116393	0,717113210163173	0,228	0,421	23.2786	4
FXYD31	0.0316891	0,423027780586464	0,891	0,778	63.3782	4
MX1	0.039287	0,257192285756765	0,936	0,641	78.574	4
NDUFA4L2	0.178569	0,260733509111719	0,698	0,467	357.139	4
LY6E1	0.515639	0,523135959351587	0,98	0,903	1031.28	4
GCLM	0.654415	0,264107312833501	0,906	0,825	1308.83	4
CBR3	1.42924	0,397180877754935	0,564	0,343	2858.48	4
TM4SF1	0.0272984	0,337412484628506	0,931	0,858	54.5968	4
PTGR1	8.63232	0,423007183967745	0,688	0,482	17264.6	4
CD59	76.3775	0,369337944916185	0,955	0,925	1527.55	4
MPZL2	11.3514	0,336539855973544	0,802	0,632	22702.7	4
KRT18	175.138	0,337911937021908	0,896	0,777	350276	4
TAGLN2	224.468	0,36943989344058	0,911	0,82	448937	4
C12orf751	284.396	0,398844613682539	0,97	0,922	568792	4
ATOX11	296.578	0,318040253967302	0,871	0,618	593155	4
PPP1R14B1	6599.62	0,275324862406097	0,906	0,807	1.31992e+07	4
TUBA1B	21148.4	0,589331379580121	0,985	0,824	4.22967e+07	4
H2AFY	777119	0,355051578125354	0,842	0,689	1.55424e+09	4
SDC1	1.61521e+06	0,251220493727866	0,693	0,566	3.23043e+09	4
ARL6IP1	1.89406e+06	0,250900956614088	0,96	0,858	3.78812e+09	4
TNFSF101	6.16519e+06	0,331443134638199	0,96	0,884	0,000123303702334256	4
ID11	1.53608e+07	0,297087090729662	0,965	0,738	0,000307216160365524	4
GMNN	3.41703e+06	0,252376659027633	0,713	0,513	0,00068340523622956	4
CLEC2B1	4.34949e+07	0,336743582587959	0,842	0,644	0,000869897658504427	4
C19orf331	1.11151e+08	0,310779459707604	0,728	0,539	0,00222302554383069	4
DSC2	2.30389e+08	0,474472924874619	0,752	0,629	0,00460778407193962	4
DSP1	1.172e+07	0,368254507209546	0,881	0,898	0,0234400663300801	4
CXCL10	3.59279e+09	0,32257270588552	0,916	0,929	0,0718557303045894	4
CSTA	3.7656e+08	0,485037333937204	0,658	0,477	0,0753119251017499	4
PTTG1	0,000131825237807068	0,429617598337382	0,683	0,588	0,263650475614135	4
F12	0,00168126865466416	0,261203201813437	0,579	0,4	1	4
PTMS1	0,00226027567057836	0,273107272684804	0,881	0,802	1	4
NUSAP1	7.6087e-95	149249475459957	0,97	0,325	1.52174e-91	5
RRM2	1.12193e-93	120214219420022	0,96	0,456	2.24387e-91	5
MKI67	1.38875e-93	180023977649221	0,97	0,451	2.7775e-90	5
TOP2A	1.03386e-91	157617555390478	0,96	0,241	2.06771e-88	5
VIM	1.97875e-90	364278947868855	1	0,967	3.9575e-87	5
HMGB2	1.11152e-89	20232100647055	0,98	0,688	2.22303e-86	5
ASPM	2.74989e-88	143312963138421	0,94	0,402	5.49978e-85	5
H2AFZ	3.36486e-87	168051397798454	1	0,703	6.72972e-85	5
SRGN	3.97658e-88	18002374624755	0,995	0,948	7.95317e-84	5
CCNB2	3.43669e-86	0,800437403106847	0,91	0,187	6.87337e-83	5
CIT	4.7316e-86	0,461681963013838	0,871	0,129	9.4632e-83	5
LCP1	2.83715e-85	154995916421478	0,975	0,856	5.6743e-82	5
DEPDC1B	5.48398e-85	0,359068641411004	0,886	0,19	1.0968e-81	5
CENPF	3.53506e-84	175055048314092	0,965	0,562	7.07012e-81	5
UBE2C	3.9604e-84	114187698474078	0,955	0,729	7.92081e-81	5
SGO1	1.36673e-83	0,70092535542736	0,935	0,503	2.73346e-80	5
KNL1	1.84942e-83	0,887271185809273	0,94	0,614	3.69884e-80	5
TUBA1B1	1.7454e-82	159419179690016	1	0,823	3.49079e-80	5
HMGB11	5.30654e-81	108053305906215	1	0,955	1.06131e-77	5
MND1	7.23604e-82	0,501741037423317	0,92	0,3	1.44721e-77	5
CEP55	5.69009e-80	0,794684152057927	0,925	0,533	1.13802e-77	5
BATF	3.34117e-79	0,446217336197611	0,915	0,565	6.68233e-76	5
TPX2	3.54531e-79	0,923761391368764	0,95	0,69	7.09061e-77	5
KIFC1	1.32722e-78	0,524707135721581	0,896	0,258	2.65444e-75	5
CDCA3	2.9934e-79	0,604387766065243	0,925	0,676	5.98681e-76	5
TYMS	5.89187e-78	113641420759785	0,96	0,731	1.17837e-74	5
STMN1	6.815e-78	151288634854633	0,99	0,68	1.363e-74	5
HMGN2	8.50813e-78	139914679662585	1	0,797	1.70163e-74	5
SMC4	9.46586e-78	124996723976852	0,985	0,732	1.89317e-74	5
NUF2	9.6023e-78	0,747765499681394	0,94	0,843	1.92046e-74	5
HMMR	1.1853e-77	0,98987094346309	0,92	0,628	2.3706e-74	5
LAT	1.54224e-77	0,443786492982254	0,91	0,455	3.08449e-74	5
CENPK	1.79264e-77	0,692822799943614	0,96	0,644	3.58527e-74	5
CENPE	7.17468e-77	0,99891312370526	0,905	0,361	1.43494e-73	5
LMNB1	7.39289e-77	0,833650848025432	0,955	0,665	1.47858e-73	5
TUBB	1.09615e-76	145758860114968	0,99	0,732	2.19229e-73	5
TMSB4X	2.61176e-76	223600159609263	1	0,946	5.22351e-73	5
GTSE1	3.67527e-76	0,910122185108662	0,93	0,797	7.35055e-73	5
SHCBP1	7.0127e-76	0,511010395142039	0,896	0,384	1.40254e-73	5
AURKB	1.34282e-75	0,735682879598529	0,91	0,534	2.68565e-72	5
CD52	1.42292e-75	142210874558996	0,945	0,93	2.84583e-72	5
DLGAP5	5.2627e-75	0,924281681849758	0,92	0,742	1.05254e-71	5
ARHGDIB	8.96671e-76	142368302417248	0,975	0,545	1.79334e-71	5
TACC3	1.6985e-74	0,841063426042268	0,93	0,775	3.39699e-72	5
CDK1	3.09511e-74	0,911131172234999	0,925	0,679	6.19023e-71	5
LAPTM5	3.69191e-74	112908568284276	0,975	0,94	7.38381e-71	5
PTPRC	5.59914e-74	157334492058289	0,965	0,927	1.11983e-72	5
CD69	1.43116e-73	127392389283176	0,965	0,933	2.86232e-70	5
STK17B	7.13389e-73	0,89179432670836	0,955	0,946	1.42678e-69	5
BIRC5	2.82403e-72	113715666902004	0,925	0,741	5.64806e-69	5
CDKN3	3.38445e-73	0,959119279537751	0,925	0,741	6.76889e-71	5
SGO2	6.38406e-72	0,646990036286801	0,915	0,487	1.27681e-68	5
RAC2	1.91714e-71	114514692815131	0,96	0,94	3.83427e-68	5
BUB1B	2.88075e-71	0,433006308875473	0,91	0,588	5.76149e-68	5
CENPM	4.21562e-71	0,685974845374287	0,915	0,695	8.43124e-68	5
HIST1H1B	6.37514e-71	0,81427925109216	0,876	0,353	1.27503e-67	5
SPC25	1.61637e-70	0,609990474906107	0,876	0,349	3.23273e-67	5
TROAP	5.69468e-70	0,457348917982494	0,891	0,577	1.13894e-66	5
PRC1	8.10415e-70	0,588041274826212	0,9	0,614	1.62083e-67	5
KIF20B	1.03932e-69	0,933752724750629	0,945	0,522	2.07864e-66	5
RAD51AP1	2.0765e-69	0,543901932341949	0,935	0,541	4.15301e-66	5
PLK1	2.1862e-70	0,431684680736219	0,876	0,463	4.3724e-67	5
UBE2T	3.02239e-69	0,652269459147818	0,94	0,611	6.04479e-66	5
ZWINT	2.08695e-69	0,773496096152758	0,915	0,52	4.1739e-65	5
BUB1	2.80264e-68	0,610850791758338	0,92	0,878	5.60527e-65	5
ARHGAP11A	5.60863e-68	0,473461249118173	0,905	0,591	1.12173e-65	5
KIF11	1.42141e-67	0,652490546944462	0,905	0,627	2.84281e-64	5
CDC20	2.22406e-67	0,764038429414835	0,881	0,398	4.44811e-64	5
SLC2A31	3.37972e-67	0,915119438815329	0,965	0,747	6.75943e-64	5
COTL1	4.83619e-67	119569593232896	0,94	0,917	9.67239e-64	5
BRCA1	8.42405e-67	0,657699036929633	0,935	0,377	1.68481e-63	5
CDKN2C	1.64204e-66	0,495265196673352	0,896	0,513	3.28407e-63	5
CYBA	1.87751e-67	11298798266753	0,98	0,913	3.75502e-63	5
IL2RA	4.1425e-67	0,353425382554531	0,861	0,535	8.28501e-64	5
CKS2	5.61323e-67	104402762321113	0,955	0,747	1.12265e-62	5
SKA1	7.39997e-66	0,35345909677084	0,896	0,802	1.47999e-62	5
S100A4	9.6076e-66	196092918703124	0,99	0,489	1.92152e-62	5
ESCO2	1.20207e-65	0,562657054825424	0,866	0,284	2.40415e-62	5
AP1S2	4.26998e-65	0,6520979853266	0,945	0,727	8.53997e-62	5
NDC80	9.26201e-65	0,634043185089847	0,9	0,738	1.8524e-61	5
TCF19	3.97901e-64	0,434163322765712	0,891	0,294	7.95803e-61	5
PRR11	6.84472e-64	0,448465704874598	0,886	0,596	1.36894e-60	5
ADCYAP1	6.25745e-63	0,691628106082901	0,866	0,656	1.25149e-59	5
CD37	1.07563e-62	0,783633109789485	0,94	0,906	2.15125e-60	5
TPSAB1	2.02146e-62	13402351552766	0,93	0,818	4.04291e-59	5
DIAPH3	2.86237e-62	0,596079938172874	0,896	0,796	5.72474e-59	5
IQGAP2	3.7118e-62	0,465659473246055	0,925	0,902	7.4236e-59	5
CTSG	4.41725e-62	134289111899558	0,9	0,9	8.8345e-59	5
TMPO	8.46538e-62	101460407353543	0,97	0,617	1.69308e-58	5
RGS11	2.28288e-61	124969134115354	0,945	0,927	4.56576e-58	5
FCER1G	5.31606e-61	0,934415473326875	0,94	0,945	1.06321e-57	5
CYTOR	9.6345e-61	0,748746584283356	0,91	0,937	1.9269e-57	5
MYBL1	2.59346e-60	0,294619182241004	0,856	0,548	5.18691e-57	5
CPA3	2.92909e-60	154982001004189	0,915	0,872	5.85817e-57	5
KIF23	9.76967e-61	0,658183780526189	0,896	0,927	1.95393e-56	5
RGCC	9.84431e-60	0,748269460707704	0,915	0,94	1.96886e-56	5
CORO1A	1.04853e-61	146813998350658	0,91	0,909	2.09706e-58	5
MIR4435-2HG	1.21218e-59	0,43617247361238	0,925	0,902	2.42436e-56	5
CXorf21	1.27567e-59	0,262675967754596	0,886	0,808	2.55133e-56	5
ACTB	1.73859e-59	144969252471547	1	0,987	3.47718e-56	5
CKLF	2.97662e-59	0,948373973596945	0,95	0,912	5.95325e-56	5
LCP2	3.49797e-59	0,273745189210776	0,876	0,641	6.99593e-56	5
FEN1	5.43046e-59	0,655305101642707	0,9	0,389	1.08609e-55	5
SERPINB9	8.33705e-60	0,340642344915333	0,915	0,925	1.66741e-56	5
RASGRP1	1.10203e-58	0,29926052641691	0,891	0,813	2.20405e-55	5
CD53	1.29196e-59	0,733628937268179	0,935	0,93	2.58392e-55	5
CCNA2	2.45938e-58	0,535212283903311	0,856	0,49	4.91875e-55	5
FN1	5.0707e-59	0,252619075727026	0,846	0,461	1.01414e-55	5
KIF14	9.61164e-59	0,45250014166349	0,881	0,826	1.92233e-54	5
ARHGAP11B	1.36082e-57	0,422259051088126	0,896	0,757	2.72164e-54	5
TMSB101	1.54566e-58	127988919763081	1	0,975	3.09132e-55	5
CKAP2L	2.70808e-57	0,643328912177948	0,881	0,768	5.41616e-54	5
CAVIN2	6.4831e-57	0,295483301452869	0,896	0,895	1.29662e-53	5
HCLS1	6.61393e-57	0,670296241644137	0,915	0,865	1.32279e-53	5
SAPCD2	1.31679e-56	0,308952928681955	0,856	0,499	2.63358e-53	5
TPSB2	1.63814e-56	282731901971112	0,94	0,917	3.27627e-53	5
DHFR	2.63067e-56	0,611484609392061	0,92	0,54	5.26135e-53	5
HLA-DPA1	7.38791e-56	0,965165996061295	0,96	0,931	1.47758e-52	5
GLIPR2	1.00538e-55	0,395887842329908	0,871	0,576	2.01075e-52	5
IKZF3	1.39331e-55	0,464281136689446	0,896	0,896	2.78662e-52	5
CTLA4	2.61645e-55	0,329597236106344	0,871	0,847	5.2329e-52	5
HCST	2.91567e-55	0,888233918594694	0,91	0,896	5.83134e-52	5
AL157895.1	5.56503e-55	0,358907817826353	0,881	0,844	1.11301e-51	5
NCAPD2	7.35859e-55	0,405287548736919	0,905	0,652	1.47172e-51	5
SNX10	2.4048e-54	0,271987969492273	0,861	0,524	4.8096e-51	5
TPM3	4.76066e-54	0,992035371508567	0,985	0,734	9.52132e-51	5
SAMSN1	4.96824e-54	0,640077030554288	0,935	0,934	9.93647e-51	5
NCAPG	6.18978e-54	0,671364037422896	0,891	0,906	1.23796e-50	5
PTGER4	1.26771e-54	0,304353797756203	0,861	0,448	2.53542e-51	5
KIF18A	2.49091e-53	0,320369268331035	0,861	0,663	4.98183e-50	5
ALDH1A1	2.66573e-53	0,440331559595963	0,881	0,599	5.33146e-50	5
CLSPN	3.23671e-53	0,795800298659819	0,861	0,386	6.47342e-50	5
AURKA	4.95874e-53	0,522839170609889	0,846	0,556	9.91749e-50	5
TNFRSF4	6.05382e-53	0,331055484513619	0,866	0,772	1.21076e-49	5
IL1RL1	6.66086e-53	0,42414507070427	0,9	0,869	1.33217e-49	5
SPOCK2	6.71287e-53	0,284859564204232	0,871	0,752	1.34257e-49	5
ANP32E	1.19342e-52	100754025617808	0,955	0,689	2.38683e-49	5
FANCI	1.35219e-53	0,507357008758624	0,891	0,617	2.70437e-49	5
SMC2	1.70347e-52	0,865911564003089	0,935	0,62	3.40693e-49	5
PTTG11	2.17272e-52	106109811153531	0,945	0,562	4.34543e-49	5
UBE2S	3.04945e-52	111827231508242	0,95	0,796	6.09891e-49	5
PFN11	3.56609e-52	118006304385164	0,995	0,917	7.13219e-49	5
CKAP2	8.58955e-52	0,852197461564057	0,92	0,459	1.71791e-48	5
EZH2	1.82222e-51	0,670110300396754	0,91	0,422	3.64444e-48	5
CDC6	4.41024e-51	0,40980439433242	0,811	0,179	8.82047e-48	5
ETS11	4.52789e-52	0,536105986521541	0,9	0,917	9.05577e-49	5
MAD2L1	9.74386e-51	0,698753674599233	0,896	0,738	1.94877e-47	5
ZEB1	9.92529e-51	0,2808795781295	0,861	0,607	1.98506e-47	5
TRBC2	1.91903e-50	0,659769005054643	0,881	0,907	3.83806e-47	5
FAM107B	2.25052e-50	0,910040085792137	0,93	0,673	4.50104e-47	5
TRAC	2.60975e-50	0,73511008434656	0,896	0,923	5.21949e-47	5
H2AFX	4.92437e-51	0,7876768223726	0,93	0,922	9.84873e-47	5
HPGDS	5.53057e-50	125716200845568	0,91	0,804	1.10611e-46	5
HLA-DRB1	3.09909e-49	11561700576196	0,955	0,973	6.19818e-46	5
CREM	3.53861e-49	0,540715866170578	0,93	0,862	7.07723e-46	5
GPSM3	3.62873e-49	0,488727778186377	0,9	0,903	7.25747e-46	5
PTPN7	4.03957e-49	0,711210317829013	0,866	0,808	8.07914e-46	5
ZEB21	4.48918e-51	0,529254705848552	0,925	0,678	8.97836e-46	5
RAB11FIP1	4.55239e-49	0,474342722641343	0,92	0,885	9.10479e-46	5
CTSH	9.86166e-49	0,589152973698737	0,871	0,51	1.97233e-45	5
CYTIP	2.00947e-48	0,623206278841946	0,896	0,916	4.01893e-45	5
PBK	2.38485e-48	0,605849361158518	0,826	0,445	4.76969e-45	5
CSF1	2.60518e-48	0,393647671450831	0,881	0,693	5.21036e-45	5
KIF4A	2.6544e-48	0,418609212838715	0,841	0,669	5.30879e-45	5
RAB32	4.97435e-48	0,440896174344028	0,896	0,637	9.9487e-45	5
GNLY	1.03924e-47	0,878335635369246	0,811	0,631	2.07847e-44	5
PCLAF	2.15525e-48	100070526121148	0,856	0,471	4.31049e-44	5
KIT	2.65466e-47	0,47682130681694	0,905	0,793	5.30932e-44	5
LIMD2	2.70456e-47	0,551933575324677	0,9	0,695	5.40912e-44	5
RACGAP1	5.07611e-48	0,292838582403312	0,856	0,639	1.01522e-43	5
KPNA2	5.23219e-48	0,81986210706346	0,92	0,666	1.04644e-43	5
GPR183	7.01217e-47	0,778911405412229	0,9	0,936	1.40243e-43	5
ATAD2	7.50917e-47	0,811395217149097	0,935	0,835	1.50183e-43	5
GATA2	1.98349e-46	0,504352239903471	0,9	0,892	3.96699e-43	5
KIF15	1.67032e-45	0,444583437804586	0,841	0,635	3.34063e-42	5
INSIG1	5.0951e-45	0,350660594135877	0,876	0,695	1.01902e-41	5
HIST1H1C	5.63391e-45	0,819862027475568	0,92	0,62	1.12678e-41	5
SPN	1.57424e-44	0,449317714144069	0,886	0,8	3.14848e-42	5
MELK	3.69416e-44	0,343684211687309	0,856	0,61	7.38832e-41	5
CCL4	4.45229e-44	0,874064687784897	0,881	0,879	8.90458e-41	5
NCKAP1L	8.05205e-45	0,410620275472984	0,871	0,912	1.61041e-40	5
TRBC1	1.3556e-43	0,386238718591923	0,866	0,902	2.71119e-40	5
ORC6	1.65806e-43	0,52209164758457	0,836	0,405	3.31612e-40	5
CFL1	1.8279e-43	0,917336856589824	0,995	0,851	3.6558e-40	5
MIR155HG	1.85165e-45	0,297967854675864	0,886	0,897	3.70331e-40	5
CKS1B	4.53543e-43	0,697732509805438	0,935	0,598	9.07086e-40	5
METRNL	5.34188e-43	0,388209690638709	0,881	0,766	1.06838e-39	5
CST7	7.09326e-43	0,373776692942844	0,876	0,939	1.41865e-39	5
SLA	9.4796e-44	0,284919856600842	0,856	0,762	1.89592e-39	5
MS4A1	3.15067e-42	0,64819562758905	0,876	0,932	6.30134e-39	5
ARPC1B	3.82535e-42	0,798186690269615	0,99	0,961	7.6507e-39	5
HDC	3.89957e-42	0,560170199188383	0,915	0,791	7.79915e-39	5
RUNX3	5.70427e-42	0,689045532742574	0,891	0,943	1.14085e-38	5
DUSP4	5.75346e-43	0,462617262028064	0,866	0,906	1.15069e-38	5
CD831	6.86876e-42	0,538338926045464	0,925	0,881	1.37375e-38	5
CDKN2D	1.54973e-41	0,773571336538319	0,905	0,756	3.09946e-38	5
CCNB1	1.77093e-41	0,932579026349028	0,861	0,689	3.54186e-38	5
CD48	2.15364e-41	0,487307966866464	0,93	0,942	4.30728e-38	5
LCK	2.22723e-41	0,308888036199623	0,866	0,9	4.45447e-38	5
SPAG5	4.09053e-41	0,266477144296354	0,851	0,899	8.18105e-38	5
RGS21	5.09232e-41	0,547379834186335	0,945	0,787	1.01846e-37	5
WAS	5.27822e-41	0,373418735335353	0,871	0,913	1.05564e-37	5
CDT1	6.07388e-41	0,372700346305974	0,816	0,289	1.21478e-37	5
NKG7	6.0869e-41	0,498060208289136	0,831	0,723	1.21738e-37	5
ICOS	1.45713e-40	0,257824431988537	0,846	0,899	2.91427e-37	5
CENPW	1.55921e-40	0,792858541758069	0,9	0,623	3.11842e-37	5
RGS10	4.60383e-40	0,68556690761409	0,925	0,583	9.20766e-37	5
H2AFY1	1.00604e-39	0,681542121989254	0,98	0,675	2.01207e-36	5
IL32	1.49037e-39	0,841305208933908	0,861	0,793	2.98074e-36	5
HLA-DPB1	2.60769e-39	0,867088141667858	0,91	0,951	5.21538e-36	5
CD84	3.09164e-39	0,356097740667091	0,876	0,91	6.18327e-36	5
CD7	3.91224e-39	0,323277825999288	0,836	0,765	7.82447e-37	5
RHEX	9.10084e-39	0,575994765100447	0,891	0,84	1.82017e-35	5
POU2F21	3.61884e-38	0,568865373813426	0,891	0,932	7.23769e-35	5
TYROBP	3.95744e-38	0,424817633093828	0,91	0,912	7.91487e-35	5
ARL6IP11	4.16882e-38	0,895911289313973	0,97	0,857	8.33764e-35	5
ICAM3	4.82444e-38	0,465374183780141	0,851	0,786	9.64889e-35	5
CTSC	6.27724e-38	0,585823465997838	0,95	0,627	1.25545e-34	5
IKZF1	1.53378e-37	0,530899774494665	0,891	0,919	3.06757e-34	5
TNFRSF1B	2.09228e-37	0,387442308548845	0,851	0,867	4.18455e-34	5
MS4A2	2.54843e-37	0,952339990662899	0,896	0,93	5.09687e-34	5
LGALS1	1.12769e-36	165356120469205	0,905	0,963	2.25539e-33	5
SLC16A3	2.63103e-36	0,251759829311902	0,881	0,869	5.26206e-33	5
CD3D	2.967e-36	0,590264600809272	0,861	0,906	5.93399e-33	5
ANLN	3.54517e-36	0,648522914503082	0,801	0,603	7.09033e-33	5
CD2	3.8141e-36	0,7510824327191	0,846	0,905	7.6282e-33	5
LTB	5.41708e-36	0,484251734499472	0,876	0,934	1.08342e-32	5
CD4	7.30408e-37	0,251597303985832	0,861	0,885	1.46082e-32	5
ECT2	1.25978e-35	0,560233014007217	0,841	0,597	2.51957e-33	5
DTYMK	2.36468e-35	0,5288510345996	0,93	0,707	4.72936e-32	5
MCM5	2.79874e-35	0,382871984224591	0,851	0,326	5.59748e-32	5
HLA-DMA	3.30264e-36	0,590992722265055	0,925	0,941	6.60528e-32	5
COL6A3	3.33811e-35	0,684817884263543	0,851	0,93	6.67622e-32	5
HIST1H4C	9.93271e-35	163488222445953	0,945	0,839	1.98654e-33	5
PCOLCE	3.95165e-34	0,252790796843587	0,856	0,833	7.9033e-31	5
CD74	4.26741e-34	100562632439925	0,94	0,984	8.53483e-31	5
VCAN	1.88577e-33	0,273243822397872	0,851	0,93	3.77154e-30	5
CDCA8	2.15728e-33	0,419214757097886	0,806	0,616	4.31456e-30	5
GMNN1	2.63371e-33	0,496515910903933	0,856	0,499	5.26742e-30	5
FYB1	3.17771e-33	0,408887794742818	0,846	0,934	6.35542e-30	5
TNFAIP3	4.37991e-33	0,654063605654679	0,93	0,913	8.75982e-30	5
CCL5	1.47007e-32	0,423240347749182	0,866	0,847	2.94015e-29	5
CD96	1.88326e-32	0,291843202815764	0,841	0,892	3.76651e-29	5
E2F8	1.91816e-32	0,355758506694116	0,786	0,618	3.83633e-29	5
TK1	7.39748e-32	0,80233381930675	0,821	0,833	1.4795e-28	5
EVI2B	1.05659e-32	0,416701711287895	0,831	0,937	2.11318e-28	5
BIRC31	1.92599e-31	0,672706835067892	0,945	0,891	3.85198e-28	5
SH3BGRL31	2.44052e-32	0,897089676372273	0,985	0,906	4.88104e-29	5
FOXM1	4.61553e-31	0,394871348737381	0,796	0,758	9.23107e-28	5
PLIN2	5.16616e-31	0,259161809930929	0,856	0,392	1.03323e-27	5
CRIP1	8.89655e-32	0,414577920023164	0,871	0,293	1.77931e-27	5
HPGD	9.59414e-31	161049658705405	0,925	0,819	1.91883e-27	5
SERPINB11	1.53962e-30	0,569162135042967	0,945	0,684	3.07924e-27	5
EFHD21	2.61783e-30	0,435265099808296	0,93	0,83	5.23567e-27	5
HLA-DRA	3.15741e-30	0,952396265970164	0,94	0,976	6.31482e-27	5
YWHAH	3.68224e-30	0,672173540439527	0,94	0,718	7.36447e-27	5
LYN	5.144e-30	0,262174939247942	0,861	0,647	1.0288e-26	5
CENPU	2.02626e-30	0,597777594063578	0,796	0,473	4.05252e-27	5
UCP2	3.41804e-29	0,647834223367449	0,816	0,907	6.83608e-26	5
ENTPD1	4.05033e-29	0,476818169670509	0,786	0,788	8.10067e-26	5
MCM7	7.31537e-29	0,564882988347152	0,871	0,4	1.46307e-25	5
TNFRSF13B	1.8852e-28	0,255020119357051	0,861	0,907	3.7704e-25	5
PHACTR1	3.19133e-28	0,305762156906999	0,836	0,801	6.38266e-25	5
MXD3	5.27719e-28	0,313684682272382	0,791	0,742	1.05544e-24	5
COL1A2	7.35254e-28	113394275982622	0,856	0,936	1.47051e-24	5
TUBA1A	1.47261e-27	0,662790378259687	0,96	0,79	2.94522e-24	5
HLA-DQB1	1.5692e-27	0,839731135847477	0,905	0,955	3.1384e-24	5
BANK1	1.6686e-27	0,250805284940159	0,766	0,494	3.33721e-24	5
PPP1R15B1	1.70815e-27	0,291938830123127	0,95	0,83	3.41631e-24	5
IRF8	2.04572e-27	0,327823056902677	0,846	0,939	4.09144e-24	5
CD3G	2.77233e-27	0,349467372677768	0,821	0,887	5.54467e-24	5
TNF1	3.71193e-27	0,272399803384755	0,876	0,8	7.42387e-24	5
LSP1	4.8683e-27	0,671445342697292	0,876	0,597	9.73659e-24	5
SAMHD1	8.0342e-27	0,351827494086671	0,886	0,946	1.60684e-23	5
PCNA	8.24665e-27	0,770270265536823	0,915	0,626	1.64933e-23	5
CAPG	5.52631e-28	0,804668310443317	0,96	0,564	1.10526e-23	5
COL6A2	6.18185e-27	0,645698061371291	0,846	0,643	1.23637e-22	5
PLEKHO1	2.0535e-25	0,313197750951597	0,846	0,838	4.10699e-22	5
BRCA2	2.27675e-25	0,550418307942555	0,821	0,681	4.55351e-22	5
AHR	3.72541e-25	0,265351879881149	0,881	0,732	7.45082e-22	5
ASF1B	4.61614e-25	0,409129470506373	0,761	0,54	9.23228e-22	5
COL3A1	8.50871e-25	133730562247254	0,886	0,943	1.70174e-21	5
UHRF1	1.81051e-24	0,283264472678549	0,721	0,312	3.62102e-21	5
CCNE2	2.44166e-24	0,292311890429861	0,826	0,716	4.88332e-21	5
CXCR41	2.66814e-24	0,816910672653404	0,831	0,945	5.33628e-21	5
HMGB3	2.8448e-24	0,466570980313701	0,876	0,668	5.68959e-21	5
NCAPG2	3.47086e-24	0,405645396902632	0,811	0,538	6.94173e-21	5
GLRX	3.78093e-24	0,402533145692847	0,856	0,866	7.56185e-21	5
GPR65	5.09983e-24	0,434818521262782	0,801	0,896	1.01997e-20	5
ATAD5	6.72141e-24	0,546780035818555	0,746	0,272	1.34428e-20	5
ITGB2	6.81306e-24	0,626291036342016	0,836	0,943	1.36261e-20	5
ISG15	8.32532e-24	0,363063059704435	0,905	0,833	1.66506e-20	5
RNASE6	2.66312e-23	0,316118410266488	0,786	0,855	5.32623e-20	5
KIF2C	3.1212e-23	0,305526811561023	0,771	0,639	6.2424e-20	5
ACOT7	3.43563e-23	0,316261714505736	0,871	0,816	6.87126e-20	5
CLU	3.48811e-23	0,586318632420084	0,92	0,45	6.97621e-20	5
DUSP21	4.87218e-23	0,510607006322119	0,94	0,916	9.74437e-21	5
LAT2	5.69843e-23	0,402721068313219	0,786	0,936	1.13969e-19	5
CTSS	6.20643e-23	0,321862325554891	0,851	0,736	1.24129e-20	5
CD3E	8.15192e-23	0,391250928975995	0,841	0,894	1.63038e-19	5
CALU	4.60925e-22	0,397168047056252	0,92	0,754	9.2185e-19	5
IL7R	5.80374e-22	0,304869066982852	0,831	0,907	1.16075e-18	5
DEPDC1	1.38235e-21	0,440803996460024	0,731	0,548	2.7647e-18	5
HSPA5	1.90095e-21	0,844261216838518	0,98	0,924	3.80189e-18	5
LGALS2	2.16372e-21	0,281122929877403	0,846	0,927	4.32743e-18	5
CD27	3.65797e-22	0,379589451098285	0,826	0,923	7.31594e-18	5
DUT	7.06941e-21	0,888349139204499	0,93	0,772	1.41388e-17	5
IGLC3	1.0926e-20	147239748547947	0,582	0,951	2.18521e-17	5
HLA-DQA1	4.97965e-20	0,788102518507967	0,816	0,951	9.95929e-17	5
LST1	7.12306e-20	0,265931770884588	0,871	0,824	1.42461e-16	5
KDM6B1	8.69068e-20	0,282538858455226	0,94	0,891	1.73814e-17	5
PLAUR	1.36057e-19	0,277818047077076	0,891	0,907	2.72113e-16	5
GZMA	1.99989e-19	0,519382845248177	0,826	0,9	3.99977e-16	5
SLC20A1	3.04239e-19	0,384792580543835	0,915	0,823	6.08477e-16	5
SLC18A2	1.33005e-18	0,462948775177405	0,836	0,895	2.6601e-15	5
ANKRD281	2.98152e-18	0,612006957731859	0,891	0,843	5.96305e-15	5
ABI3	3.57782e-18	0,254661814992315	0,741	0,73	7.15563e-15	5
CENPH	3.91812e-18	0,405068665827035	0,836	0,702	7.83623e-15	5
MCM4	2.09421e-17	0,349457627758603	0,861	0,449	4.18843e-14	5
TAGLN21	5.08786e-17	0,568484856977023	0,975	0,814	1.01757e-13	5
KRT11	6.77491e-17	0,447756003435261	0,647	0,381	1.35498e-13	5
FBXO5	2.44129e-16	0,349852116787225	0,781	0,712	4.88258e-13	5
CHEK1	3.4429e-16	0,30575305874945	0,756	0,436	6.88581e-13	5
GAPDH2	2.80619e-15	0,51988916679977	0,995	0,957	5.61238e-12	5
FGL2	8.21579e-15	0,347891131366749	0,781	0,723	1.64316e-11	5
HMGA1	1.16995e-14	0,46135378778923	0,856	0,75	2.3399e-11	5
SPI1	1.29823e-14	0,398080412597378	0,771	0,817	2.59645e-11	5
MEF2C1	1.55052e-14	0,487332691657944	0,826	0,888	3.10105e-11	5
HSP90B1	9.91809e-14	0,755877631447745	0,98	0,938	1.98362e-10	5
CCDC341	2.91722e-13	0,332631709452283	0,726	0,295	5.83445e-10	5
SNX3	5.71081e-13	0,429552905862217	0,98	0,813	1.14216e-10	5
BST21	7.14841e-13	0,271763141251066	0,955	0,968	1.42968e-09	5
VWA5A	8.08746e-13	0,451727938399864	0,836	0,501	1.61749e-09	5
PPT1	1.11415e-12	0,301277630176455	0,811	0,554	2.2283e-09	5
FAM30A	1.69053e-12	0,367524710973061	0,726	0,799	3.38107e-09	5
PRDM1	4.89239e-12	0,391012277487315	0,836	0,856	9.78478e-09	5
PLEK	9.97025e-12	0,259928137099433	0,881	0,937	1.99405e-08	5
BTK	1.02684e-11	0,263348374142058	0,766	0,878	2.05368e-08	5
NAMPT	1.74408e-11	0,368502795024038	0,935	0,918	3.48816e-08	5
ALOX5AP	2.20169e-11	0,624028063047016	0,726	0,842	4.40337e-08	5
JPT1	5.73043e-11	0,502207720133647	0,935	0,777	1.14609e-07	5
CD79A1	1.14388e-10	0,58638723302102	0,826	0,909	2.28775e-07	5
SEC11C1	1.77167e-10	0,512407399301721	0,935	0,867	3.54334e-07	5
DEK	1.76793e-09	0,521125811949848	0,96	0,792	3.53586e-06	5
PIF1	3.14797e-09	0,289600304451776	0,736	0,838	6.29593e-06	5
RRM1	7.88005e-09	0,390469998625601	0,781	0,526	1.57601e-05	5
MCM3	8.50128e-09	0,368002868806818	0,766	0,531	1.70026e-05	5
IL10RA	1.28957e-08	0,258879481815926	0,796	0,888	2.57913e-05	5
KLF61	1.77454e-08	0,624311506793663	0,985	0,987	3.54909e-05	5
COL1A1	2.53527e-09	138550849324599	0,871	0,892	5.07054e-05	5
HELLS	4.34769e-09	0,567738842149587	0,761	0,623	8.69537e-05	5
NFKBIA	1.07669e-07	0,496817661021455	0,99	0,954	0.000215338	5
TUBB4B	1.30489e-07	0,471443922443368	0,97	0,967	0.000260979	5
BCAS2	1.5017e-07	0,263762740350292	0,91	0,632	0.00030034	5
ITM2A	2.66296e-07	0,347478225710673	0,856	0,496	0.000532593	5
CXCL8	3.81734e-08	0,307500379207069	0,786	0,875	0.000763468	5
IGHA1	6.29017e-07	226698450912278	0,801	0,933	0.00125803	5
ODC11	6.45495e-07	0,308889300158044	0,9	0,881	0.00129099	5
POSTN	9.40727e-07	0,429211387052846	0,836	0,447	0.00188145	5
ACAT2	4.27561e-06	0,320403850010884	0,766	0,631	0.000855121	5
ATOX12	7.2141e-06	0,323085923935348	0,945	0,61	0.0144282	5
SOCS1	8.20512e-06	0,455239610513982	0,925	0,952	0.0164102	5
ISG201	1.5146e-05	0,402543662708434	0,836	0,921	0.030292	5
TCF4	1.69965e-05	0,261308224736281	0,851	0,766	0.033993	5
TTK	6.94115e-05	0,406710736129228	0,662	0,612	0.138823	5
SSR41	0.000143891	0,379237119849773	0,98	0,952	0.287782	5
GADD45B	0.000248508	0,382643646470162	0,935	0,971	0.497015	5
NCAPH	0.00101021	0,283785889635094	0,687	0,807	2.02042	5
CTSZ	0.00305903	0,271350355856438	0,905	0,966	6.11805	5
FTL	0.00350979	0,496043776536572	0,985	0,956	7.01958	5
HNRNPU1	0.00363313	0,336829062335645	0,985	0,91	7.26626	5
KIF2A	0.00400125	0,264068825533037	0,915	0,751	8.0025	5
JCHAIN	0.00612984	139161036249422	0,761	0,895	12.2597	5
HLA-DMB	0.0131898	0,305263783625555	0,766	0,938	26.3796	5
CPVL	0.0293867	0,282748053963237	0,672	0,795	58.7733	5
FAM111B	0.0462947	0,532415528960003	0,677	0,739	92.5894	5
ITM2C1	0.0558991	0,577682625870932	0,886	0,902	111.798	5
CST3	0.0970392	0,358407579405669	0,96	0,879	194.078	5
FKBP1A	0.134926	0,289059762270174	0,96	0,708	269.852	5
IGHG31	0.551453	0,771052085078765	0,766	0,937	1102.91	5
HERPUD11	1.33687	0,33552424885128	0,95	0,915	2673.73	5
LTC4S	18.2297	0,345518296833279	0,726	0,883	36459.4	5
ACTG11	19.1462	0,437199235241769	0,98	0,961	38292.4	5
REL	24.3654	0,279797325769462	0,93	0,766	48730.8	5
C1orf162	125.835	0,40164429815106	0,677	0,905	251670	5
IGLC21	332.509	168576540588256	0,821	0,974	665017	5
TUBA1C1	452.835	0,307403859870565	0,94	0,856	905670	5
GINS2	11766	0,333325873421071	0,547	0,268	2.35321e+07	5
TIMP1	15305.4	0,5942668842155	0,94	0,926	3.06109e+07	5
TUBA4A1	37156.4	0,36711194315158	0,701	0,643	7.43127e+07	5
PPP1R15A	48049	0,252976381374272	0,99	0,941	9.60981e+07	5
CDCA5	57686	0,357525960414864	0,657	0,929	1.15372e+08	5
AIF1	840128	0,303383786386811	0,711	0,881	1.68026e+09	5
LUM1	1.52343e+06	0,322421989249194	0,811	0,662	3.04686e+09	5
CTSW	1.23348e+07	0,388717562315642	0,587	0,614	0,000246695230330019	5
S100B	1.61035e+06	0,319865517773283	0,607	0,781	0,00032206990730402	5
CENPN	2.16875e+07	0,324851944837943	0,592	0,588	0,000433749457313604	5
FTH1	1.17433e+08	0,411869636202109	1	0,959	0,00234865009431217	5
ARL4C	2.97564e+08	0,278759700866346	0,91	0,682	0,00595127250862354	5
IGKC1	4.4553e+08	125477118797635	0,99	1	0,00891059227993889	5
MZB11	1.77168e+09	0,526484507990117	0,846	0,928	0,0354335768316861	5
POLQ	2.44785e+09	0,288337261691379	0,572	0,611	0,0489570934788938	5
CTSD1	0,000122673192692774	0,360007850135405	0,935	0,809	0,245346385385549	5
SGK1	0,00111615666121598	0,350378913252968	0,91	0,696	1	5
DERL31	0,00212089054692131	0,350458634147734	0,821	0,929	1	5
XBP11	0,00861295994316418	0,341588381875319	0,886	0,954	1	5
IGHG11	0,0097442261766174	173820932795692	0,851	0,964	1	5
JUN	4.3825e-43	165188406776151	1	0,984	8.765e-40	6
IER21	3.49699e-42	170013226580794	1	0,958	6.99397e-39	6
EGR11	2.58975e-39	167113368908647	1	0,881	5.17949e-36	6
ATF31	2.59021e-32	148605615238819	1	0,779	5.18042e-29	6
DERL32	1.02223e-31	0,350845865288871	1	0,916	2.04446e-28	6
RASD1	4.35993e-30	0,43665888460765	1	0,908	8.71985e-27	6
PPP1R15A1	4.51276e-30	118989155542367	1	0,943	9.02553e-27	6
DUSP5	8.4159e-30	0,358503136208593	1	0,91	1.68318e-26	6
CXCL3	3.47061e-28	0,383549722233129	1	0,787	6.94122e-25	6
RGS16	8.73245e-28	0,320091428068058	1	0,792	1.74649e-24	6
IGHG12	1.35439e-27	0,256128766485932	1	0,952	2.70879e-24	6
GADD45B1	2.70996e-24	120801905576116	1	0,966	5.41992e-21	6
TRIB1	7.09754e-24	0,348442881827559	1	0,562	1.41951e-20	6
KLF41	7.83488e-24	0,9860768181212	1	0,748	1.56698e-21	6
CITED21	9.60078e-24	101309412702539	1	0,775	1.92016e-20	6
KLF21	2.43894e-22	0,62769764830103	1	0,939	4.87788e-19	6
CCN21	2.80018e-21	0,392851377160043	0,99	0,584	5.60036e-18	6
DNAJB1	7.76978e-21	0,91169446119746	1	0,949	1.55396e-17	6
DUSP11	1.53269e-20	0,995985391095575	1	0,911	3.06537e-17	6
PMAIP11	1.73786e-20	0,783349228349378	0,99	0,703	3.47572e-17	6
TENT5C1	2.79767e-20	0,497207594163428	1	0,915	5.59533e-17	6
AC058791.1	3.69548e-20	0,252956086162506	1	0,88	7.39095e-17	6
HERPUD12	4.05513e-20	0,797472493951848	1	0,914	8.11027e-18	6
FAM43A	4.73925e-21	0,269386405859574	1	0,825	9.47849e-18	6
NFKBIA1	1.78938e-18	122948757445258	1	0,955	3.57876e-15	6
MZB12	4.26894e-18	0,336413588223244	1	0,917	8.53788e-15	6
TUBB2A	2.79345e-16	0,757184847893509	0,961	0,683	5.58691e-13	6
EGR2	5.55273e-16	0,307005986782563	1	0,862	1.11055e-12	6
DUSP22	8.00845e-16	0,662270156009356	1	0,914	1.60169e-12	6
IGHG41	1.29804e-15	0,289478699043851	1	0,912	2.59609e-12	6
GEM1	1.99623e-15	104918925687477	1	0,932	3.99246e-12	6
IER3	6.27275e-15	0,793609418033038	0,99	0,93	1.25455e-11	6
LMNA1	1.49565e-13	0,623317040673751	1	0,942	2.9913e-10	6
EGR3	1.64037e-13	0,481046189003685	1	0,838	3.28074e-10	6
ANKRD371	1.02468e-12	0,942171296956725	0,922	0,607	2.04936e-09	6
CDKN1A	1.36056e-12	0,456317573735418	1	0,921	2.72111e-09	6
AC007952.41	4.22607e-12	0,333041900884961	1	0,701	8.45214e-09	6
SAT1	1.24709e-10	0,702236325353889	1	0,949	2.49418e-07	6
RHOB	2.97277e-10	0,633944764909857	0,903	0,531	5.94553e-07	6
JDP21	6.82421e-10	0,630150558232079	0,981	0,577	1.36484e-06	6
CXCL21	3.38947e-09	0,317375200101015	1	0,824	6.77894e-06	6
MAFB	8.56339e-09	0,649195834459085	0,99	0,823	1.71268e-06	6
TUBB4B1	1.12717e-08	0,602036758784488	1	0,966	2.25434e-05	6
H1FX	3.97601e-09	0,627216632964093	1	0,949	7.95203e-07	6
H2AFX1	6.15767e-07	0,290894469023603	1	0,919	0.00123153	6
DDIT4	1.29177e-06	0,440275495660422	1	0,891	0.00258355	6
NRARP	3.80739e-06	0,509402848915758	0,942	0,663	0.00761477	6
POU3F11	4.85359e-05	0,572131295346929	0,845	0,488	0.0970718	6
PHLDA12	8.69497e-05	0,407101022581292	1	0,952	0.173899	6
UBE2S1	0.000116589	0,402573667944844	1	0,801	0.233177	6
XBP12	0.000141735	0,300898946246756	1	0,945	0.28347	6
NR4A2	0.000289929	0,474033586138559	1	0,833	0.579859	6
SELENOM1	0.00168188	0,278741859640613	1	0,883	3.36377	6
MYC1	0.000301134	0,703163958463258	1	0,83	6.02268	6
TSC22D11	0.00401868	0,677522547533431	0,981	0,811	8.03735	6
CEBPB1	0.0144873	0,442735734116809	1	0,914	28.9746	6
FTL1	0.0154691	0,391884831123559	0,99	0,957	30.9383	6
AC020916.11	0.0442393	0,497466005915263	0,99	0,867	88.4787	6
IRF1	6.06944	0,6059139319786	1	0,926	12138.9	6
GADD45G	9.86096	0,52653702048702	0,845	0,834	19721.9	6
HSPA21	45.4216	0,355621826082373	0,961	0,611	90843.2	6
SOCS11	109.522	0,299710399310013	1	0,948	219045	6
IER5	148.564	0,347217184905775	1	0,949	297127	6
CXCL101	1152.88	0,585770786751128	1	0,925	2.30577e+06	6
SSR42	174.918	0,276149473815072	1	0,952	349837	6
HSPA51	2797.04	0,319710665320917	1	0,926	5.59408e+06	6
ZFP36L11	3225.91	0,38300573912043	1	0,93	6.45182e+06	6
PTN1	35755.1	0,298511446937479	1	0,786	7.15102e+07	6
KLF51	426020	0,278843435179277	0,874	0,66	8.52039e+08	6
DLK2	881726	0,26774094848293	0,777	0,521	1.76345e+09	6
ID12	1.00984e+06	0,336721648853702	0,942	0,75	2.01969e+09	6
IER5L	1.07062e+06	0,278849345710491	0,942	0,909	2.14124e+09	6
ID4	2.6252e+07	0,362533024559009	0,738	0,544	0,000525040484865188	6
ZNF503	3.70795e+07	0,36385606187558	0,65	0,496	0,000741589550765876	6
ETS21	5.63508e+06	0,304937889193987	0,883	0,789	0,00112701579390512	6
IFI6	7.7477e+07	0,265626031089905	1	0,954	0,00154953947880936	6
KRT8	1.61134e+08	0,339431144426787	0,816	0,652	0,00322267747057536	6
GAS11	2.1539e+08	0,285513927425541	0,854	0,612	0,00430779113631477	6
CCN11	2.60639e+07	0,426044291858228	0,748	0,721	0,0052127896009596	6
PLK2	2.66947e+08	0,367130180576198	0,738	0,601	0,00533894363413182	6
CBR12	2.7743e+08	0,271247720227714	0,99	0,82	0,00554859781988858	6
RND32	3.57298e+08	0,300860656029378	0,942	0,804	0,00714595900320205	6
KRT181	5.45072e+08	0,269741636419688	0,845	0,785	0,0109014347727948	6
MARCKSL1	2.78313e+09	0,310422518096486	0,913	0,825	0,0556626638653664	6
AC091271.1	0,000319827811766191	0,280556257344089	0,854	0,701	0,639655623532382	6
AREG1	0,000419755121653285	0,562464062190706	0,709	0,636	0,839510243306571	6
KRT171	0,00107922409500983	0,551681492450023	0,524	0,427	1	6
AC023157.3	0,00215257776425826	0,322096728842827	0,767	0,67	1	6
GZMK	4.23039e-16	0,269020288692973	1	0,898	8.46077e-13	7
IL7R1	2.99566e-15	0,366733639360269	1	0,898	5.99133e-12	7
FYB11	2.64362e-13	0,251616009464581	1	0,925	5.28723e-10	7
DTL	5.34672e-11	0,28354744095344	1	0,553	1.06934e-07	7
FAM111B1	1.33959e-11	0,564294633425401	1	0,728	2.67919e-07	7
LGALS21	1.15977e-09	0,260849728201522	1	0,918	2.31954e-06	7
CDT11	1.16567e-09	0,650367707007669	1	0,322	2.33135e-06	7
AIF11	2.7314e-09	0,267472215175329	1	0,863	5.46279e-06	7
NCKAP1L1	4.77963e-09	0,254012262051817	1	0,906	9.55926e-06	7
SPI11	5.94767e-09	0,250847573270862	1	0,809	1.18953e-05	7
GPR1831	7.24526e-09	0,392351883944545	1	0,932	1.44905e-05	7
PCLAF1	7.43483e-09	0,762361012717045	1	0,495	1.48697e-05	7
ITGB21	1.10122e-08	0,346388322467158	1	0,932	2.20245e-05	7
HLA-DQA11	2.18179e-08	0,338808927731841	1	0,938	4.36359e-05	7
HLA-DQB11	3.34899e-08	0,382336563631721	1	0,95	6.69798e-06	7
GINS21	4.82434e-08	0,566470725679832	0,978	0,279	9.64868e-05	7
TK11	5.93708e-08	0,425470778270607	1	0,829	0.000118742	7
HCLS11	7.29361e-08	0,287060481355442	1	0,866	0.000145872	7
FGL21	7.74618e-08	0,326788763122279	1	0,722	0.000154924	7
UCP21	8.72437e-08	0,263544532173158	1	0,897	0.000174487	7
HLA-DRA1	1.01238e-07	0,396941692356505	1	0,973	0.000202477	7
CD481	1.05144e-07	0,265826680779401	1	0,94	0.000210288	7
MCM51	1.37667e-07	0,711049782475135	1	0,359	0.000275335	7
HLA-DRB11	2.01354e-07	0,367405823790865	1	0,97	0.000402708	7
CLSPN1	2.14154e-07	0,489818243810634	1	0,416	0.000428308	7
RAD51AP11	2.55805e-07	0,305755086395495	1	0,567	0.00051161	7
CORO1A1	2.87202e-07	0,351278846627838	1	0,907	0.000574404	7
HLA-DPB11	2.92287e-08	0,258864389041128	1	0,946	5.84575e-05	7
LCP11	3.13877e-07	0,355009706610659	1	0,864	0.000627754	7
CD531	4.15675e-07	0,259925635133732	1	0,929	0.00083135	7
HLA-DMA1	4.83886e-07	0,480576723119164	1	0,938	0.000967772	7
LAPTM51	6.4542e-07	0,339234267336759	1	0,942	0.00129084	7
CHEK11	7.95177e-07	0,535388939897937	0,978	0,453	0.00159035	7
COTL11	1.03652e-06	0,352980045781838	1	0,918	0.00207304	7
ISG151	1.86715e-06	0,39544709236455	1	0,836	0.00373429	7
LIMD21	6.64991e-06	0,251357573230444	1	0,707	0.00132998	7
CD741	1.25752e-05	0,604461741230774	1	0,98	0.0251503	7
UHRF11	1.84829e-05	0,305907679804407	0,978	0,335	0.0369658	7
LMNB11	4.96101e-05	0,303789855762454	1	0,685	0.0992201	7
FEN11	7.25296e-05	0,444819348298269	1	0,422	0.145059	7
MAD2L11	0.000154416	0,413858292640183	1	0,746	0.308832	7
DEK1	0.000456218	0,688982356053009	1	0,803	0.912437	7
GMNN2	0.00126516	0,60507234632362	1	0,521	2.53033	7
CKLF1	0.000131959	0,547447521858289	1	0,914	0.263919	7
DHFR1	0.00143379	0,319594646385644	1	0,565	2.86757	7
CTSH1	0.000380386	0,275847871949722	1	0,532	7.60773	7
DUT1	0.00442962	0,652781760433799	1	0,782	8.85924	7
CENPU1	0.00840754	0,419566949412327	0,935	0,493	16.8151	7
EZH21	0.00841539	0,373175492161626	1	0,454	16.8308	7
H2AFZ1	0.00880885	0,744924733269671	1	0,724	17.6177	7
MCM31	0.0147387	0,674296135600083	0,957	0,543	29.4774	7
PFN12	0.0182106	0,679747004777465	1	0,922	36.4212	7
PCNA1	0.00237398	0,678031730671451	1	0,645	4.74795	7
EFHD22	0.0460531	0,449949303449153	1	0,836	92.1062	7
TPM31	0.0664645	0,67115983914233	1	0,751	13.2929	7
ATAD21	0.176762	0,329453048856509	0,978	0,841	353.524	7
UBE2T1	0.184811	0,250712754194661	1	0,633	369.622	7
CENPW1	0.225866	0,631462326772226	0,957	0,641	451.731	7
RGS101	1.06642	0,390246044841784	1	0,605	213.284	7
BRCA11	1.8276	0,30993497687185	0,957	0,415	3655.2	7
TMSB102	3.93229	0,567092009128923	1	0,977	7864.58	7
TUBA1B2	13.5783	0,494504177261082	1	0,835	27156.6	7
HMGA11	18.9476	0,415834800982067	1	0,754	37895.3	7
STMN11	26.3458	0,55287384288216	1	0,701	52691.5	7
CTSC1	27.1117	0,369801894190324	1	0,648	54223.3	7
CRABP2	2.84989	0,289004417566906	0,891	0,24	5699.79	7
CTSZ1	29.6226	0,479315627681148	1	0,96	59245.1	7
PLEK2	47.8952	0,292483888210981	1	0,902	95790.4	7
TUBB1	59.4244	0,495893355998668	1	0,75	118849	7
ACTB1	203.684	0,318329856156373	1	0,988	407369	7
CYBA1	255.46	0,479429739592055	1	0,917	510921	7
ARHGDIB1	57.0515	0,341455084603734	1	0,574	1.14103e+06	7
PHLDA2	660.3	0,2503875539742	1	0,778	1.3206e+06	7
RRM11	194.429	0,43432698612027	0,935	0,54	38885.7	7
ORC61	2422.06	0,29801185969469	0,848	0,435	4.84412e+06	7
ENO12	3076.13	0,467680209494806	1	0,872	6.15226e+06	7
CENPH1	3145.55	0,332579536562022	0,935	0,709	6.2911e+06	7
TYMS1	3337.59	0,364696372261487	0,935	0,748	6.67518e+06	7
SLC20A11	4021.24	0,269600691843296	1	0,828	8.04248e+06	7
SMC21	6135.27	0,404679744846743	0,978	0,641	1.22705e+07	7
ANXA22	6918.72	0,448800274744378	1	0,904	1.38374e+07	7
EIF4EBP1	7808.17	0,448200154484899	0,913	0,591	1.56163e+07	7
CFL11	8228.68	0,425536032648434	1	0,861	1.64574e+06	7
IL1RN1	1803.25	0,260676112198181	1	0,435	3.60651e+07	7
YWHAH1	25101.1	0,388605428721629	1	0,733	5.02022e+07	7
BST22	26075.9	0,339298331959292	1	0,966	5.21518e+07	7
TXN1	32154.8	0,444234660295237	1	0,828	6.43095e+07	7
TMPO1	79369.1	0,279578461038914	1	0,641	1.58738e+08	7
ARPC1B1	132543	0,405699324084629	1	0,963	2.65087e+07	7
LSP11	23975.8	0,36585019200187	1	0,613	4.79516e+07	7
PPA1	296700	0,41474665423052	0,978	0,763	5.93401e+08	7
NDUFAF6	548812	0,276995878647949	0,87	0,492	1.09762e+09	7
HELLS1	557797	0,461733359307819	0,87	0,63	1.11559e+09	7
HMGN21	9206.26	0,280394651849234	1	0,811	1.84125e+08	7
CTNNBIP1	106988	0,381449913974291	1	0,566	2.13976e+08	7
SMC41	1.43205e+06	0,273130630293253	0,978	0,75	2.8641e+09	7
HTRA11	2.60587e+06	0,290148197936353	1	0,537	5.21174e+09	7
SH3BGRL32	5.72309e+06	0,335760865828248	1	0,911	0,000114461738872655	7
ODC12	5.90019e+06	0,258621553398765	1	0,88	0,000118003787537114	7
TACSTD21	6.65584e+06	0,287102742302921	1	0,619	0,000133116857616368	7
FKBP1A1	9.10755e+06	0,33306167682341	0,957	0,725	0,000182150992591909	7
CENPX	1.02705e+07	0,355131696557545	0,913	0,513	0,000205409156201514	7
HMGB12	1.04085e+07	0,28941668316997	1	0,958	0,000208169829068065	7
MCM41	1.13954e+07	0,280808830483655	0,783	0,479	0,000227907296957733	7
TAGLN22	2.30171e+07	0,367417747386726	0,978	0,825	0,000460341802840587	7
SOD21	3.5684e+06	0,305157374271051	1	0,866	0,00071367949717434	7
ATAD51	5.62628e+07	0,306834989122227	0,696	0,306	0,00112525681531495	7
PKM2	8.73621e+07	0,339569677705428	1	0,862	0,00174724203191887	7
CBR31	9.90559e+07	0,296070237809063	0,63	0,357	0,00198111757590594	7
FABP51	1.43463e+08	0,271060896275276	0,957	0,693	0,00286926122058568	7
TYMP1	1.58154e+08	0,377604918099704	1	0,974	0,00316308217727836	7
S100A112	2.41417e+08	0,325376579062634	1	0,905	0,0048283467308317	7
PPP1R14B2	2.41672e+08	0,295595662014447	0,978	0,812	0,0048334427590587	7
MT1G	2.87713e+08	0,416268743247052	0,717	0,351	0,00575425421785082	7
ATOX13	3.41784e+08	0,253170517375603	1	0,633	0,00683567527306037	7
GAPDH3	8.73056e+08	0,271326652144042	1	0,96	0,0174611211406777	7
MCM71	2.32091e+09	0,334242069562588	0,804	0,434	0,0464181320500159	7
CLEC2B2	3.54021e+09	0,279722590374269	1	0,654	0,0708042198799868	7
DTYMK1	7.77862e+09	0,255966862559062	0,826	0,725	0,155572394300235	7
LYZ	6.61939e-11	43572172950968	1	0,95	1.32388e-07	8
HLA-DPB12	7.10132e-11	35851925745439	1	0,946	1.42026e-07	8
CST31	7.2109e-11	326911212946072	1	0,884	1.44218e-07	8
SPI12	7.50784e-11	164994413956068	1	0,81	1.50157e-07	8
HLA-DRA2	7.71931e-11	375886314243402	1	0,973	1.54386e-07	8
HLA-DQA12	8.2813e-11	322886011411999	1	0,938	1.65626e-07	8
HLA-DRB12	9.11945e-11	368551449202121	1	0,971	1.82389e-07	8
HLA-DQB12	9.39912e-11	287313987601025	1	0,95	1.87982e-07	8
AIF12	9.47684e-11	217286613222892	1	0,864	1.89537e-07	8
HLA-DPA11	9.49311e-11	350093427604798	1	0,932	1.89862e-07	8
ITGB22	1.01585e-10	171497941635009	1	0,933	2.0317e-07	8
CD742	1.09276e-10	328255394148072	1	0,98	2.18552e-07	8
FGL22	1.19893e-11	190808848555032	1	0,723	2.39785e-08	8
CPVL1	1.34392e-11	265499259617948	1	0,781	2.68784e-07	8
HLA-DMA2	1.483e-10	184319017108532	1	0,938	2.966e-07	8
AC020656.1	2.50195e-10	157408718398987	1	0,816	5.00391e-07	8
CTSZ2	2.97531e-10	178906299275731	1	0,96	5.95062e-07	8
COTL12	3.04664e-10	233088336888008	1	0,918	6.09328e-07	8
HLA-DMB1	3.60354e-10	152768046086921	1	0,922	7.20708e-07	8
SAMHD11	4.02226e-10	150865005384305	1	0,939	8.04453e-07	8
UCP22	7.12441e-10	135866046234344	1	0,897	1.42488e-06	8
PPT11	7.29877e-10	146664810011811	1	0,57	1.45975e-06	8
PLEK1	9.34396e-11	135139679394781	1	0,931	1.86879e-06	8
LCP12	1.07913e-09	181024209025715	1	0,864	2.15825e-06	8
HCLS12	1.36164e-09	109093634982419	1	0,867	2.72327e-06	8
ACTB2	1.76604e-09	19089561135933	1	0,988	3.53207e-06	8
TMSB4X1	2.26651e-10	213591502728428	1	0,95	4.53303e-06	8
PTPRC1	2.72026e-09	142261034648481	1	0,93	5.44052e-06	8
CTSS1	3.70558e-09	152988485835908	1	0,742	7.41117e-07	8
TMSB103	4.44482e-09	169691922753693	1	0,977	8.88965e-06	8
LAPTM52	4.90284e-09	166670039203868	1	0,942	9.80569e-07	8
RAB321	1.21714e-08	128685471684383	1	0,655	2.43427e-05	8
TPM32	1.27131e-08	136298185115892	1	0,752	2.54262e-05	8
LY86	1.57669e-08	0,89931503292068	0,972	0,827	3.15339e-05	8
CYBA2	1.77268e-08	146829872025302	1	0,917	3.54535e-05	8
CORO1A2	3.30776e-08	136717111033241	1	0,908	6.61552e-05	8
CFL12	3.40514e-08	12196863055717	1	0,862	6.81028e-05	8
SRGN1	3.9682e-08	191422112734891	1	0,952	7.93641e-05	8
ARHGDIB2	6.18571e-08	135712256868411	1	0,576	0.000123714	8
VIM1	1.02822e-07	128370122420803	1	0,969	0.000205644	8
OTULINL	1.55129e-07	0,80375240740959	0,972	0,858	0.000310257	8
LGALS22	1.84097e-07	171528028422789	0,972	0,919	0.000368195	8
RGS102	2.74968e-08	127685496856694	1	0,607	5.49936e-05	8
NCKAP1L2	3.23961e-07	0,745254445477463	0,972	0,907	0.000647923	8
PFN13	3.40361e-07	126592755386163	1	0,922	0.000680721	8
AP1S21	4.77429e-08	134541835139844	0,972	0,743	9.54857e-05	8
HMGB21	9.18759e-07	1733462171658	1	0,709	0.00183752	8
EFHD23	1.11588e-06	106476343786082	1	0,836	0.00223176	8
TUBA1B3	2.51042e-07	167034539685748	1	0,836	5.02084e-05	8
CD532	4.09905e-06	0,910488938257003	0,972	0,93	0.0081981	8
C1orf54	7.43394e-08	144355798215009	0,944	0,776	0.00148679	8
H2AFZ2	8.75065e-06	133398364861145	1	0,725	0.0175013	8
GPR1832	1.0112e-05	165083907215649	0,972	0,933	0.020224	8
H2AFY2	1.35684e-06	108426794427677	1	0,698	0.0271368	8
SLC8A1	2.14847e-05	0,703041099695268	0,944	0,741	0.0429694	8
HMGN22	2.93473e-05	141240911710282	1	0,812	0.0586946	8
HCK	2.99156e-05	0,817460952309129	0,917	0,614	0.0598311	8
TUBA1A1	3.64406e-05	124339242187431	1	0,802	0.0728811	8
RAB11FIP11	4.4656e-05	12262103926182	1	0,887	0.089312	8
PHACTR11	6.38177e-05	0,962212767313579	0,944	0,802	0.127635	8
ARPC1B2	6.95442e-05	112351038306701	1	0,963	0.139088	8
MKI671	0.000136613	141943407770453	0,944	0,489	0.273226	8
LYN1	0.000252201	0,646992539837816	0,972	0,661	0.504401	8
LGALS11	0.000293186	144317315187947	0,972	0,958	0.586372	8
CD482	0.000427031	0,917988792781617	0,944	0,941	0.854062	8
STMN12	0.000443824	11851137896195	1	0,702	0.887648	8
NAAA	0.000565668	0,771537395182453	0,889	0,508	1.13134	8
ASPM1	0.00105556	0,90570825362927	0,944	0,442	2.11112	8
TUBB2	0.00128129	139863960008021	1	0,751	2.56258	8
JAML	0.000164654	112576117259678	0,917	0,879	0.329307	8
TSPAN33	0.0018283	0,955053442196363	0,917	0,87	3.65659	8
MNDA	0.00193982	153170744206712	0,889	0,719	3.87964	8
GLIPR1	0.000201942	103225243582671	0,972	0,898	0.403884	8
CKLF2	0.00207073	113473722985906	0,972	0,915	4.14145	8
PCLAF2	0.00276547	103343798438052	0,917	0,498	5.53095	8
GLIPR21	0.000347481	0,693314021096934	0,889	0,597	0.694962	8
FTL2	0.00377491	164111685092148	1	0,958	7.54981	8
IRF81	5.41403e-05	185299158246851	0,917	0,931	1.08281	8
TGFBI	0.00582441	117351917390408	0,944	0,426	11.6488	8
PSAP	0.000997814	114973039291471	1	0,864	19.9563	8
IER51	0.0149234	0,918295830702669	1	0,95	29.8469	8
CENPE1	0.0152811	0,757854944269796	0,889	0,401	30.5621	8
CD371	0.00167771	0,802041587322447	0,944	0,909	3.35542	8
TOP2A1	0.00175489	103889639278521	0,889	0,295	3.50978	8
NUSAP11	0.0189724	0,856041275120969	0,917	0,373	37.9449	8
DEK2	0.0227399	0,907710764886174	1	0,804	45.4798	8
PLBD1	0.0295794	0,678015311182966	0,889	0,578	59.1588	8
STK17B1	0.0331559	0,783607178952562	0,972	0,946	66.3117	8
LMNB12	0.0388328	0,773855171117025	0,917	0,687	77.6657	8
SH3BGRL33	0.0417513	0,989589562056566	1	0,912	83.5026	8
CLSPN2	0.0462776	0,731452986090865	0,861	0,421	92.5552	8
LSP12	0.0687767	114354648895438	0,972	0,616	137.553	8
DEPDC1B1	0.0763449	0,264820699521129	0,722	0,244	152.69	8
CTSH2	0.0964417	134654574389195	0,861	0,537	192.883	8
SERPINF1	0.135975	0,791218368024815	0,944	0,619	271.951	8
NDRG2	0.138945	0,687282209733609	0,889	0,43	277.889	8
LGALS9	0.156706	0,679437182664669	0,889	0,755	313.412	8
CEP551	0.184873	0,674664389999591	0,889	0,562	369.747	8
CYTOR1	0.209789	0,644279971114425	0,917	0,935	419.578	8
KIF20B1	0.253867	0,64895745805177	0,944	0,553	507.733	8
WAS1	0.408785	0,671183495235314	0,889	0,909	817.571	8
CCNB21	0.428045	0,530294154964356	0,75	0,243	85.6091	8
CIITA	0.0493573	0,787331196197047	0,889	0,921	987.147	8
MPEG1	0.51586	0,773466860860514	0,861	0,702	1031.72	8
HMMR1	0.536577	0,817104644088857	0,889	0,65	1073.15	8
CDKN31	0.631237	0,601159895980927	0,917	0,755	1262.47	8
HMGA12	0.747567	0,849797771761402	0,944	0,756	1495.13	8
HMOX1	0.761646	0,415856812852421	0,722	0,377	152.329	8
SPN1	0.0100389	0,567231146737758	0,889	0,806	2007.77	8
YWHAH2	1.13397	0,990833678782712	0,972	0,734	2267.93	8
CD86	1.16392	0,695463873479925	0,889	0,854	2327.85	8
ALDH2	1.25803	0,770726617610615	1	0,664	251.606	8
HMGB13	0.128736	0,787052678350504	1	0,958	257.471	8
CKS1B1	1.42708	0,767091829591353	1	0,622	2854.15	8
EVI2B1	1.44934	0,732832895107604	0,889	0,929	2898.68	8
PLEKHO11	0.0192138	0,716700970534819	0,889	0,838	3842.76	8
CCSER1	1.93094	0,378804406997751	0,75	0,268	3861.88	8
TACC31	1.93978	0,664880497983913	0,889	0,787	3879.57	8
CSF2RA	0.199173	0,5639786870005	0,833	0,71	3983.46	8
CENPF1	2.03466	117117344265321	0,889	0,593	4069.32	8
FCER1G1	3.08861	164735054339769	0,889	0,945	617.723	8
CALHM6	3.72808	0,681552974246654	0,861	0,846	7456.16	8
TMPO2	3.73639	0,772738475755764	0,972	0,643	7472.78	8
METRNL1	4.69929	107367414639943	0,861	0,775	9398.57	8
SMC22	6.39759	0,726401025666757	0,972	0,642	12795.2	8
KLF62	7.09269	100250276906055	1	0,987	14185.4	8
S100B1	7.89635	134665007425947	0,833	0,764	15792.7	8
GPSM31	8.12455	0,649586061986973	0,889	0,903	16249.1	8
LST11	9.14936	121577019240378	0,861	0,828	18298.7	8
C1orf1621	9.99742	126020295487379	0,861	0,885	19994.8	8
PTPRE	10.8993	0,876279556051198	0,861	0,75	21798.6	8
SGO21	11.1123	0,625525469836797	0,833	0,52	22224.6	8
TAGLN23	11.3565	0,869074049613105	1	0,826	22713	8
CTSC2	12.1507	0,936919894402193	0,944	0,651	24301.3	8
CD841	17.7038	0,681895950793331	0,861	0,908	35407.7	8
ANP32E1	18.459	0,778952012959393	0,944	0,709	36917.9	8
LIMD22	1.90707	0,826271605962049	0,889	0,711	3814.15	8
PTGER41	20.6009	0,913869030633895	0,806	0,479	41201.9	8
WDFY4	22.0795	0,883741713097629	0,861	0,866	44159	8
SNX31	22.415	125151660676885	0,972	0,825	44830.1	8
CRIP11	23.2227	0,489207485352935	0,917	0,335	4644.54	8
MAD2L12	29.5384	0,466720693022152	0,917	0,749	59076.8	8
FGR	45.2279	0,556796677545728	0,861	0,882	90455.9	8
DAPP1	45.8418	0,593838920921267	0,833	0,562	91683.5	8
KPNA21	46.5743	0,878732684782892	0,889	0,686	93148.6	8
CST71	52.3476	0,848950790549147	0,861	0,935	104695	8
KIFC11	5.76307	0,520890820184901	0,722	0,308	115261	8
CLEC7A	59.9927	0,666826888600949	0,917	0,491	11998.5	8
ESCO21	68.0308	0,516731348161349	0,694	0,33	136062	8
RRM21	68.0616	0,568186112093631	0,806	0,496	136123	8
SERPINB12	72.6616	0,662107601759294	0,917	0,704	145323	8
GSN	78.2787	0,787709354884262	0,972	0,595	15655.7	8
DSE	97.1697	0,712128488106875	0,944	0,719	194339	8
GSTP12	102.183	0,954039718668243	1	0,876	204366	8
UBE2C1	135.127	101440991600228	0,861	0,747	270254	8
AURKB1	274.489	0,568333750815062	0,833	0,563	548979	8
GADD45B2	27.4503	0,870975972343489	0,944	0,968	549005	8
SMC42	32.9753	0,674918850472626	0,944	0,751	65950.5	8
SLAMF8	35.9354	0,682184591755635	0,833	0,896	718708	8
LITAF	392.793	0,701262799031926	0,972	0,916	785586	8
PRKAR2B	412.373	0,443154840067209	0,694	0,407	824747	8
BRCA21	441.541	0,574934071185311	0,861	0,69	88308.2	8
CENPW2	45.3389	0,507156976056331	0,972	0,642	90677.8	8
LAT21	533.378	0,577517602135076	0,861	0,924	106676	8
ZWINT1	742.437	0,502976847423709	0,806	0,551	1.48487e+06	8
UHRF12	762.795	0,394802152471065	0,694	0,342	1.52559e+06	8
EZH22	811.368	0,415567846622459	0,861	0,459	1.62274e+06	8
CENPM1	856.12	0,563086923921523	0,833	0,713	1.71224e+06	8
BIRC51	949.614	0,617015324689458	0,861	0,756	189923	8
ARL6IP12	1092.64	0,69451347212986	1	0,865	218528	8
TYMS2	1190.43	0,776791101970586	0,861	0,75	2.38086e+06	8
MCM52	1433.43	0,649480881751569	0,778	0,366	286686	8
RGS12	1501.3	14692022085415	0,861	0,93	3.0026e+06	8
NABP11	1588.54	0,681596599095034	0,917	0,82	3.17708e+06	8
MIR181A1HG	1631.77	0,405927492621701	0,806	0,733	3.26354e+06	8
CDK11	1983.35	0,784130582997892	0,833	0,699	3.9667e+06	8
TIMP2	222.877	0,477936685402735	0,806	0,736	445754	8
MEF2C2	2497.74	0,584749536520412	0,889	0,882	4.99547e+06	8
SHCBP11	2826.77	0,479672571594	0,722	0,424	5.65353e+06	8
DNASE1L3	2858.24	0,639534975006299	0,639	0,257	5.71648e+06	8
FTH11	3025.88	0,806469390275898	1	0,962	6.05176e+06	8
CAPG1	3260.46	103642051586636	0,917	0,594	6.52093e+06	8
S100A41	3262.06	154666761950316	0,861	0,528	6.52411e+06	8
CKAP21	334.475	0,553218112485651	0,944	0,493	6.6895e+06	8
PLAUR1	3478.69	107456181817538	0,833	0,907	695738	8
FADS1	3948.68	0,563716424797543	0,778	0,703	7.89737e+06	8
CYTIP1	4017.6	0,70660290281437	0,889	0,915	8.0352e+06	8
DUSP23	4673.82	129216797708061	0,917	0,918	9.34765e+06	8
GAS2L3	4999.65	0,304164215810895	0,556	0,293	9.9993e+06	8
KCTD12	5205.57	0,608103745057341	0,861	0,868	1.04111e+07	8
CLIC2	60.2503	0,263516961036891	0,667	0,459	1.20501e+06	8
THBD	7688.25	0,506045470605721	0,778	0,543	1.53765e+06	8
ANPEP	8191.9	0,591090727734565	0,694	0,465	1.63838e+07	8
CXCR42	8941.33	0,960609175268351	0,833	0,937	1.78827e+07	8
NRP1	8964.73	0,372473790723385	0,528	0,281	1.79295e+07	8
CKS21	11747.1	0,654869627465413	0,889	0,763	2.34942e+07	8
RGCC1	12211.8	12941471218145	0,861	0,939	2.44236e+07	8
HIST1H4C1	14397.1	144554293817975	0,944	0,847	2.87941e+07	8
TYMP2	14813	0,60504428784612	1	0,975	2.96259e+07	8
SHTN11	148.864	0,537834017344885	0,833	0,492	2.97727e+07	8
LGMN	16754.1	0,431291733414027	0,833	0,746	3.35082e+07	8
CDC201	17719.4	0,514652471913127	0,778	0,435	3.54387e+07	8
ARL4C1	25856	0,716310150894982	0,944	0,698	5.1712e+07	8
SIGLEC10	2924.8	0,337927359897377	0,639	0,458	5.84961e+07	8
BRCA12	32413.1	0,390118316204566	0,722	0,421	6.48261e+07	8
NAIP	37467.8	0,347387370202485	0,583	0,347	7.49355e+07	8
GNA15	38348.3	0,480130174295821	0,833	0,666	7.66967e+07	8
NCAPG1	39112.8	0,470021368788944	0,833	0,906	7.82256e+07	8
CD832	39683.9	142925906757047	0,833	0,885	7.93679e+07	8
UBE2S2	40469.1	0,638453264669214	0,972	0,807	8.09381e+07	8
NUF21	40709.9	0,5551111999871	0,833	0,852	8.14198e+07	8
S100A102	41538.8	0,733470697788749	1	0,927	8.30777e+07	8
LIMS1	42188.3	0,471805662798046	1	0,767	8.43765e+07	8
NCAPD21	42225.4	0,422573739206113	0,833	0,672	8.44507e+07	8
HAVCR2	46103.1	0,59944198204842	0,806	0,897	9.22061e+07	8
BST23	47079.8	0,412465028290638	1	0,966	9.41596e+07	8
ATAD52	49570.6	0,374586146931975	0,722	0,307	9.91412e+07	8
FEN12	51409.8	0,50592932854764	0,722	0,429	1.0282e+07	8
KIF111	60515	0,452793759923452	0,778	0,649	1.2103e+08	8
PRCP	69755.8	0,379705723175375	0,778	0,478	1.39512e+08	8
DHFR2	78804.7	0,538053955401504	0,75	0,57	1.57609e+08	8
RGS22	93442.3	101017566183563	0,833	0,8	1.86885e+08	8
ZNF366	98924.9	0,40611488206764	0,694	0,581	1.9785e+08	8
POU2F22	113083	0,518129535133893	0,861	0,93	2.26166e+08	8
MS4A7	132170	0,701916149729405	0,694	0,521	2.64339e+08	8
ABI31	146089	0,517354141539706	0,75	0,731	2.92178e+08	8
RUNX31	18764.6	0,862141165061258	0,833	0,94	3.75292e+08	8
MCM72	193675	0,461822064001092	0,806	0,435	3.87351e+08	8
SNX101	197348	0,521564280669247	0,694	0,551	3.94696e+08	8
CENPK1	245176	0,448958157025897	0,778	0,67	4.90353e+08	8
SLC16A31	260256	0,655354306338756	0,833	0,87	5.20511e+08	8
CD41	268675	0,859871217870305	0,778	0,884	5.37349e+08	8
TK12	270716	0,806474702705639	0,806	0,833	5.41433e+08	8
PPP1R15A2	277380	0,571295711226509	1	0,945	5.5476e+08	8
ADA2	316385	0,552685240842118	0,778	0,873	6.3277e+08	8
TPX21	378805	0,802418805138043	0,778	0,712	7.5761e+08	8
FKBP1A2	393304	0,477735606475998	1	0,726	7.86609e+08	8
AHR1	473272	0,554095111338293	0,806	0,744	9.46545e+08	8
ANXA23	474666	0,596823218732932	1	0,905	9.49332e+07	8
SGK11	516334	0,828113418262619	0,917	0,711	1.03267e+09	8
IKZF11	520792	0,388203842536958	0,833	0,917	1.04158e+09	8
HIST1H1B1	675952	0,663613593911433	0,639	0,395	1.3519e+09	8
C20orf27	705933	0,468327219968144	0,806	0,488	1.41187e+09	8
RASSF2	72841.1	0,633818927030492	0,778	0,907	1.45682e+09	8
RILPL2	810227	0,380546402435588	0,833	0,75	1.62045e+09	8
SLC2A32	83630	0,791442602761526	0,806	0,765	1.6726e+09	8
CCNA21	909404	0,407846146069147	0,722	0,519	1.81881e+09	8
BASP1	93026.8	0,742578404019001	1	0,828	1.86054e+09	8
CXorf211	931435	0,749672443767062	0,75	0,816	1.86287e+09	8
ADAP2	1.04949e+06	0,466046824523991	0,639	0,501	2.09897e+08	8
RAD51AP12	1.11593e+06	0,411909905139564	0,722	0,574	2.23186e+09	8
H2AFX2	1.17671e+06	0,718909888856341	0,861	0,924	2.35342e+09	8
SLC20A12	1.18034e+06	0,540267172154813	0,889	0,83	2.36069e+09	8
BIRC32	1.31975e+06	0,601942634572315	0,889	0,896	2.63949e+09	8
HNRNPU2	1.35838e+06	0,501560811839814	1	0,915	2.71677e+09	8
ID2	1.35994e+06	0,977374764947391	0,944	0,788	2.71988e+09	8
MARCKSL11	1.54332e+06	0,622140474094237	0,861	0,828	3.08663e+09	8
GTSE11	154706	0,660431594474169	0,778	0,809	3.09411e+08	8
NAMPT1	2.06031e+06	103542006182294	0,917	0,919	4.12063e+09	8
HSP90B11	208566	0,4943103010902	0,972	0,941	4.17132e+09	8
CD68	2.10674e+06	0,664347508028404	0,75	0,811	4.21347e+09	8
REL1	2.44347e+06	0,647796970151332	0,917	0,778	4.88695e+09	8
ATP2B1-AS1	2.46949e+06	0,592177405106889	0,833	0,853	4.93898e+09	8
IFI30	2.56922e+06	0,994158892316979	0,778	0,888	5.13844e+09	8
CD93	2.84802e+06	0,534687377765028	0,75	0,801	5.69605e+09	8
INSIG11	3.46187e+06	0,524633660131968	0,722	0,711	6.92375e+09	8
ENO13	4.54255e+06	0,535171676442886	1	0,872	9.08509e+09	8
TCF191	4.84004e+06	0,319819904497411	0,528	0,343	9.68008e+09	8
SLC43A2	5.103e+06	0,551322550846829	0,75	0,844	0,000102060032649565	8
PTTG12	5.31178e+06	0,651878033271352	0,833	0,592	0,000106235695556839	8
IL1RN2	5.51297e+06	0,691930950238908	0,639	0,443	0,000110259417204469	8
HSPA52	6.28039e+06	0,685211585440362	0,944	0,929	0,000125607801852436	8
IQGAP21	6.39016e+06	0,506524252517332	0,778	0,906	0,000127803296390423	8
AXL	6.97667e+06	0,482089600150068	0,611	0,488	0,000139533402689333	8
SGO11	7.5585e+06	0,263378190635761	0,694	0,539	0,000151169950606335	8
CDCA31	7.88e+06	0,392901175569595	0,722	0,698	0,00015759997020016	8
NFKBIA2	7.8838e+06	0,878907592156628	0,944	0,958	0,000157676085218665	8
PID1	8.03745e+06	0,291465631016389	0,5	0,366	0,000160749027945311	8
TNFAIP31	8.04752e+06	0,98459511303609	0,833	0,916	0,000160950404809009	8
SLA1	9.29973e+06	0,493119830711911	0,722	0,771	0,00018599469209279	8
GMNN3	1.01584e+07	0,356904611555584	0,778	0,527	0,000203168991881178	8
SOD22	1.10769e+07	0,604788415300237	0,944	0,868	0,000221538948318964	8
IGSF6	1.22041e+07	0,828344123634882	0,639	0,602	0,000244081003496503	8
TLR2	1.24945e+07	0,432674718820995	0,667	0,654	0,000249889192435068	8
ACTG12	1.30923e+07	0,569727954197411	1	0,963	0,000261846274755833	8
CHMP1B	1.38281e+07	0,641594506738308	0,833	0,589	0,000276562199900715	8
FNIP2	1.49619e+07	0,323164055452546	0,694	0,517	0,000299238015722475	8
RAB31	1.60963e+06	0,456792777353929	0,833	0,827	0,000321926412227919	8
GPRIN3	1.65977e+07	0,560626334946833	0,75	0,9	0,00033195376135085	8
HLA-DOA	1.69898e+07	0,415759637757115	0,75	0,904	0,00033979641052701	8
ORC62	1.79668e+07	0,307601680743142	0,667	0,44	0,000359335665534686	8
ICAM1	1.79965e+07	0,478607545217617	0,778	0,931	0,000359930491820103	8
MID1IP1	1.85794e+07	0,30240314501434	0,833	0,719	0,000371587174927488	8
CCNB11	2.13893e+07	0,58131990062058	0,75	0,703	0,000427785862620062	8
SERPINB91	2.97198e+07	0,757633543196567	0,778	0,927	0,000594396095434483	8
KIF151	3.69784e+07	0,350762939037881	0,694	0,653	0,000739568830894354	8
PPIF	3.97972e+07	0,488444708072689	0,806	0,86	0,000795944427004641	8
ADAM8	4.04677e+07	0,41141150044549	0,722	0,816	0,000809353046320301	8
NCAPH1	4.81293e+07	0,364625679372992	0,722	0,798	0,00096258520638733	8
C19orf38	4.91417e+07	0,269234606959572	0,694	0,736	0,00098283417570095	8
PPA11	5.08895e+07	0,524297030919257	0,944	0,765	0,00101779081319999	8
BATF3	5.18939e+07	0,928201697089115	0,75	0,716	0,00103787867202273	8
HMGB31	5.41299e+07	0,455107554622283	0,806	0,684	0,00108259854952578	8
ENTPD11	6.19131e+07	0,481024978698849	0,75	0,788	0,00123826149652803	8
PPP1R15B2	6.27623e+07	0,472923880290204	0,806	0,841	0,00125524647704368	8
CDKN2D1	7.18081e+07	0,431792256229678	0,806	0,769	0,00143616184843124	8
MND11	7.22984e+07	0,262743786853928	0,556	0,352	0,00144596814938003	8
PEA15	7.63654e+07	0,38989252397245	0,778	0,773	0,00152730703370225	8
PRC11	1.07679e+08	0,266112501294774	0,694	0,638	0,00215358534628147	8
PLK11	1.07895e+08	0,658576202496574	0,639	0,497	0,00215789802741645	8
DUSP12	1.12812e+08	0,551807598715503	1	0,913	0,00225623679703813	8
KNL11	1.13994e+06	0,463747329798411	0,694	0,642	0,002279877893776	8
CCDC71L	1.24824e+08	0,368704978446034	0,694	0,666	0,00249647289480226	8
LMNA2	1.74076e+08	0,437704361421613	0,972	0,944	0,00348152927035283	8
ICAM31	1.81087e+08	0,566432096094469	0,75	0,793	0,00362173294269654	8
ATP1B11	1.9846e+08	0,455362202055182	0,778	0,682	0,00396920537523993	8
HLA-DRB5	2.00951e+08	0,423601957740659	0,556	0,55	0,00401902781303329	8
CENPX1	2.16929e+08	0,296306191723457	0,806	0,517	0,00433857994495888	8
MCM42	2.28903e+08	0,276566711352786	0,722	0,481	0,00457805419154899	8
BCL6	2.29776e+08	0,460111957702675	0,806	0,763	0,00459551411582153	8
ARRB2	2.4611e+08	0,421966780899231	0,667	0,601	0,00492220393761604	8
IL10RA1	2.50124e+08	0,415380820419919	0,75	0,882	0,00500247196154613	8
GCSAM	2.71558e+08	0,432747044038855	0,556	0,395	0,00543115757733262	8
RRM12	3.20177e+08	0,284583140658127	0,806	0,544	0,00640353265943763	8
FANCI1	3.24418e+08	0,335805290400915	0,667	0,641	0,00648836965835606	8
KIF4A1	3.46944e+08	0,391160725400584	0,694	0,684	0,00693887820431772	8
IFNGR11	3.4778e+07	0,568317793303547	0,889	0,839	0,00695559253555679	8
LCP21	3.75356e+08	0,424195393979597	0,639	0,662	0,00750711599975452	8
BUB11	3.76056e+08	0,289652543955226	0,75	0,884	0,00752112161794314	8
CLEC12A	3.81274e+06	0,402888339067047	0,75	0,847	0,007625470542364	8
TNFRSF1B1	3.87086e+08	0,425547584152953	0,722	0,868	0,00774172790905864	8
IL1B	4.05551e+08	220933341947715	0,722	0,905	0,00811101066370397	8
DIAPH31	4.11066e+08	0,303035976335075	0,722	0,806	0,00822132271104696	8
DUT2	4.17444e+08	0,60639002847576	0,917	0,784	0,00834888452443405	8
ATOX14	4.59201e+08	0,275002189839742	0,889	0,636	0,00918402084070036	8
H1FX1	4.85226e+06	0,369050436148426	1	0,95	0,009704525752048	8
MCOLN2	5.37971e+08	0,316385976674719	0,667	0,628	0,010759426443028	8
IGFBP71	5.84124e+08	0,341663973182213	0,944	0,868	0,011682470278619	8
MGST1	5.94425e+08	0,354665023960906	0,444	0,329	0,0118885062115358	8
AOAH	6.21859e+08	0,621756853711734	0,694	0,753	0,0124371791163021	8
UGCG	7.20126e+08	0,288251398626661	0,75	0,704	0,0144025274060438	8
LRRC25	7.81022e+08	0,35088927448161	0,667	0,789	0,0156204485698557	8
MXD1	8.0019e+08	0,465861231175038	0,694	0,785	0,016003791934663	8
ARHGAP11B1	8.45811e+08	0,25244414822302	0,694	0,77	0,0169162228852879	8
CREM1	8.47236e+08	0,382514312900142	0,778	0,869	0,0169447115676242	8
MIR4435-2HG1	8.60818e+08	0,406456113105095	0,722	0,907	0,0172163635522073	8
KDM6B2	8.73248e+08	0,398679120190337	0,833	0,896	0,0174649582137658	8
GPR651	9.54087e+08	0,461021703093391	0,722	0,891	0,0190817365780783	8
E2F81	1.03205e+09	0,336301238658829	0,611	0,633	0,0206410364867007	8
DLGAP51	1.06698e+09	0,50576576454494	0,694	0,759	0,0213395730355551	8
RGS18	1.33327e+09	0,297633299927937	0,611	0,625	0,0266653390540879	8
CD521	1.38044e+09	0,366549260168486	0,778	0,934	0,0276087912611004	8
BTK1	1.39075e+08	0,278064157614782	0,806	0,869	0,0278150928722741	8
MAFF	1.46816e+09	0,292177380695821	0,75	0,748	0,0293632992202428	8
NLRP3	1.63327e+09	0,449409799423636	0,667	0,798	0,0326653747501899	8
ADAM19	1.70297e+09	0,329150953485927	0,75	0,904	0,0340593043660851	8
MCM32	1.88758e+09	0,337126785761379	0,694	0,549	0,0377515875657564	8
SERPINA1	1.9737e+09	0,979510413200664	0,722	0,914	0,0394739184986506	8
TROAP1	2.24597e+09	0,289773472308886	0,611	0,605	0,044919324721475	8
FCGR2A	2.2586e+09	0,767551983071265	0,611	0,661	0,0451719772431991	8
SAT11	2.48352e+09	0,460436786976132	1	0,95	0,0496703529877093	8
ARHGAP11A1	2.70963e+09	0,4124674992806	0,639	0,618	0,0541925024689987	8
DTYMK2	2.80473e+09	0,312302381299587	0,806	0,726	0,0560946915525577	8
C15orf48	2.94133e+09	150086915754453	0,694	0,937	0,0588265931262663	8
JPT11	2.98083e+09	0,379506929573435	0,944	0,789	0,0596165645120956	8
SUSD3	3.0339e+09	0,337206649587964	0,639	0,735	0,0606780777668397	8
CLEC9A	3.05763e+09	0,80544813229561	0,583	0,375	0,0611526716613505	8
WARS	3.48445e+09	0,375516345301116	0,528	0,427	0,0696890991096057	8
AURKA1	3.75751e+08	0,347465651584016	0,583	0,581	0,075150115845908	8
LMO2	3.77072e+09	0,337501226034813	0,5	0,383	0,075414418698679	8
PSTPIP1	3.90162e+09	0,291414576718379	0,583	0,533	0,0780324641252768	8
ANXA11	4.11189e+09	0,368583341952022	1	0,922	0,0822378245605034	8
FILIP1L	4.47097e+09	0,367340091170857	0,556	0,606	0,0894193017557668	8
CXCL16	4.55769e+08	0,407176317126947	0,694	0,663	0,091153773491284	8
ATAD22	4.64845e+09	0,412175738133404	0,75	0,845	0,0929689503979722	8
CENPH2	4.65204e+09	0,261923721879502	0,722	0,714	0,0930407387209405	8
CXCL81	4.65331e+09	11899727422817	0,694	0,87	0,0930662773527825	8
EIF4A3	5.84109e+09	0,270981484510265	0,889	0,917	0,116821712816222	8
PCNA2	6.78597e+09	0,392476967485723	0,75	0,65	0,135719361423324	8
TYROBP1	6.95405e+09	164456174580815	0,694	0,916	0,139081075897893	8
P2RY13	7.51343e+09	0,465175389565904	0,583	0,687	0,150268545014949	8
GPAT3	7.76805e+09	0,294944014054742	0,667	0,827	0,155360912131172	8
CLEC4A	7.98013e+09	0,531574043340029	0,583	0,66	0,159602541416887	8
HELLS2	8.25439e+09	0,396986774446488	0,694	0,634	0,165087779675372	8
GRASP1	8.70424e+09	0,439552274778195	0,667	0,743	0,174084737435174	8
MS4A6A	0,000109238882520026	153554876646513	0,694	0,91	0,218477765040053	8
CFD	0,000113053626312511	0,302286185091266	0,583	0,602	0,226107252625023	8
ATP6V1B2	0,00011477979213494	0,292270474349834	0,722	0,691	0,22955958426988	8
MMP9	0,000117383099262845	0,972421821954263	0,5	0,526	0,234766198525691	8
TUBA1C2	0,000124542403676914	0,281521391928546	0,972	0,862	0,249084807353828	8
KLF42	0,000158709461972305	0,368953409096274	0,917	0,757	0,317418923944611	8
PRR111	0,00016317784487144	0,456816841781797	0,583	0,622	0,32635568974288	8
FCER1A	0,000171550133531819	140072975564833	0,583	0,721	0,343100267063638	8
RASSF4	0,000173663268541342	0,658276979833211	0,694	0,892	0,347326537082684	8
ZEB22	0,000204777032022301	0,789033565497132	0,639	0,701	0,409554064044602	8
NR4A21	0,000217381693546582	0,53051689817104	0,806	0,841	0,434763387093164	8
FLNA	0,000218890797141262	0,331726447415099	0,917	0,777	0,437781594282525	8
GK	0,00021979669938553	0,303564180307116	0,472	0,508	0,43959339877106	8
EIF4EBP11	0,000225054078800919	0,2748314717937	0,667	0,597	0,450108157601839	8
PKIB	0,000235198877809736	0,32111837386452	0,528	0,558	0,470397755619472	8
TIMP11	0,000261020179315217	0,351024451436615	0,917	0,928	0,522040358630434	8
KYNU	0,000267669706384623	0,444810022544562	0,667	0,837	0,535339412769246	8
TNFSF13B	0,000279258657800986	0,548360717093668	0,667	0,928	0,558517315601972	8
MYBL11	0,000281785979284722	0,282362351861959	0,5	0,576	0,563571958569445	8
PDE4DIP	0,000302591682878626	0,271230874609021	0,611	0,631	0,605183365757253	8
FAM111B2	0,000343542641230546	0,506795281878645	0,639	0,735	0,687085282461093	8
IL4I1	0,000360180212077227	0,531154779627936	0,583	0,739	0,720360424154454	8
ADAM28	0,000375087000482006	0,397288764645559	0,722	0,921	0,750174000964013	8
AHNAK	0,000382003159828145	0,331721379847013	1	0,868	0,764006319656291	8
GAPDH4	0,000408021522925214	0,28246623391618	1	0,96	0,816043045850428	8
CPNE3	0,00042810931247468	0,586743419966603	0,833	0,693	0,85621862494936	8
A2M	0,000451254629058547	0,286794841499897	0,444	0,516	0,902509258117093	8
B3GNT7	0,000586242115953186	0,25925113332397	0,639	0,755	1	8
S100A113	0,000694333094346228	0,318105610710298	0,972	0,906	1	8
TLR10	0,0007758722649477	0,433343882546078	0,667	0,884	1	8
RUBCNL	0,00079461403973939	0,307151721350958	0,639	0,841	1	8
MX2	0,000795103315024354	0,325965190087769	0,667	0,894	1	8
TNF2	0,000988827893637181	0,672072590392939	0,639	0,81	1	8
ASF1B1	0,00103904885654799	0,265633368100979	0,528	0,56	1	8
LDLRAD4	0,00107272513668542	0,376490839794602	0,667	0,92	1	8
SLAMF7	0,00123145045054556	0,41483144267358	0,667	0,841	1	8
EMILIN2	0,0014226325810048	0,538412744758812	0,694	0,934	1	8
RAC21	0,00155405943441	0,298371224308176	0,75	0,945	1	8
PFKFB3	0,00229327878355982	0,275332934611452	0,722	0,869	1	8
NDC801	0,00235999445567296	0,398224867706159	0,611	0,755	1	8
HIST1H1D	0,00243822671787438	0,3121346532111	0,556	0,574	1	8
RNASE61	0,00247574625236438	0,763767531426389	0,611	0,853	1	8
BCL2A1	0,00249301500634604	0,578158965757812	0,611	0,766	1	8
FLT3	0,003335368565758	0,332660396625904	0,5	0,575	1	8
CLEC11A	0,00342792231190314	0,565500948883936	0,5	0,618	1	8
F13A1	0,00351963678714607	0,584734604985612	0,611	0,863	1	8
SPAG51	0,00400743026494443	0,358693775192905	0,639	0,899	1	8
CCL41	0,00452399465258802	123376359951199	0,639	0,883	1	8
NFKBIZ1	0,00459390585535422	0,257072080493312	0,806	0,896	1	8
HRH2	0,00466996875945891	0,446062778975687	0,611	0,88	1	8
PTAFR	0,00598910140046129	0,426619175877521	0,5	0,651	1	8
RNASE2	0,00603209512687911	0,702469107235249	0,611	0,875	1	8
CD300A	0,00660123930200363	0,292946405585092	0,556	0,73	1	8
PRDM11	0,00693726602015428	0,306922506312555	0,333	0,863	1	8
CDCA81	0,00715199879729771	0,294994925024795	0,5	0,635	1	8
ENPP1	0,00723812955654281	0,321809388475207	0,611	0,777	1	8
TMEM176B	0,00727855899684768	107917183744374	0,639	0,919	1	8
AC004687.11	0,00745115576916787	0,429796010776342	0,694	0,932	1	8
FAM107B1	0,00762810972950378	0,251215774748684	0,667	0,696	1	8
VAC14	0,00771719612125615	0,406295266189782	0,639	0,732	1	8
CLEC10A	0,00820713881463086	102488250194914	0,611	0,918	1	8
CYBB	0,0084337033816133	126323431100055	0,611	0,898	1	8
CCL4L2	0,0095180591918416	0,848558878739684	0,361	0,925	1	8
SPARCL11	0.000111111	169977654019756	1	0,762	0.222223	9
IGFBP72	0.00413989	15984122371308	1	0,867	8.27979	9
A2M1	0.01327	113518541644746	0,969	0,508	26.54	9
CCL19	0.00161156	139399581592657	1	0,849	3.22311	9
VIM2	0.133349	0,505353480807385	1	0,969	266.698	9
EMCN	1.09577	0,324567657590849	1	0,558	2191.55	9
CRISPLD2	5.89551	0,398488697429323	1	0,742	11791	9
PCOLCE1	18.2537	0,523780617857146	1	0,833	36507.5	9
ENG	86.0425	0,654109453583363	1	0,827	172085	9
RAMP2	87.0759	0,685809742828021	0,969	0,579	174152	9
SPARC	118.983	0,986862269135849	1	0,801	237965	9
MGLL	1029.75	0,436441765302315	0,969	0,619	2.0595e+06	9
TFPI	1348.79	0,471930750808503	0,938	0,652	2.69757e+06	9
ECE1	3514.71	0,48537345918404	0,938	0,574	7.02942e+06	9
COL1A21	4127.96	0,838287299073697	1	0,928	8.25593e+06	9
EGFL7	7624.39	0,47757593400748	0,938	0,652	1.52488e+07	9
PLPP3	10256.2	0,293707399426709	1	0,841	2.05124e+07	9
CAVIN3	13617	0,634420335683767	0,969	0,782	2.7234e+07	9
LAMB1	25503	0,27907330084477	1	0,601	5.1006e+07	9
COL14A1	31219.3	0,635644358533935	0,969	0,902	6.24386e+07	9
SOD3	3406.6	107886686471227	0,906	0,715	6.8132e+06	9
MFGE8	36806	0,489931010141377	0,969	0,687	7.36121e+07	9
CNN3	43605.3	0,395154336223939	1	0,914	8.72105e+06	9
COX4I2	44437.5	0,308981676342485	0,906	0,52	8.8875e+07	9
AQP1	49120.1	0,694188535382209	0,719	0,263	9.82401e+07	9
NNMT	137159	0,756045885512114	1	0,868	2.74319e+07	9
S100A42	20005.2	0,915480673478781	0,969	0,527	4.00103e+07	9
PLAC9	280538	0,586178401082411	0,688	0,187	5.61076e+08	9
KCNE4	346083	0,40337664070317	0,969	0,688	6.92166e+08	9
CD34	419596	0,250012288226997	0,844	0,676	8.39193e+07	9
LAMA4	48782.3	0,505061186001395	0,906	0,687	9.75646e+07	9
ADIRF	53620	143253023677871	0,969	0,886	1.0724e+09	9
NR2F2	681264	0,872753773889195	0,812	0,339	1.36253e+09	9
IGFBP4	795737	0,762650565218046	0,969	0,694	1.59147e+09	9
TIMP3	1.01709e+06	0,711585581873239	0,781	0,266	2.03419e+09	9
DLC1	115923	0,279845694499383	0,781	0,394	2.31847e+09	9
COL6A1	1.25752e+06	0,809734981684551	1	0,869	2.51503e+09	9
THSD7A	1.30666e+06	0,263307314713344	0,844	0,399	2.61331e+09	9
CLEC14A	1.63259e+06	0,401809384768566	0,781	0,189	3.26519e+09	9
MGP	168301	105023971889158	0,875	0,68	3.36602e+09	9
TAGLN	2.51899e+06	155494252637713	0,906	0,703	5.03797e+09	9
CCDC80	2.9429e+06	0,377852418356618	0,938	0,586	5.88579e+09	9
LGALS12	3.39575e+06	0,77505923033582	1	0,957	6.7915e+09	9
COL15A1	4.73527e+06	0,37104451973977	0,75	0,384	9.47054e+09	9
CALD1	1.25406e+07	0,889873586809215	0,969	0,666	0,000250811334753773	9
TINAGL1	1.81959e+07	0,41203610060553	0,969	0,891	0,000363917137101583	9
C11orf96	2.09468e+07	155360102482068	0,812	0,626	0,000418936090751306	9
KLF22	2.34884e+07	0,540400542351197	1	0,941	0,000469768964279788	9
TCF41	2.54416e+07	0,463887406260949	0,969	0,771	0,000508832868517769	9
GNG11	2.64611e+07	0,981029901136022	0,656	0,139	0,00052922254200261	9
ICAM11	2.83655e+07	0,259042890387115	0,969	0,928	0,000567309445132057	9
AEBP1	2.89795e+07	0,402035590791239	0,938	0,761	0,000579590031055707	9
TGFBR2	4.73313e+07	0,435491137488878	0,812	0,447	0,000946626235768212	9
CAV12	6.58384e+07	0,524562709765201	1	0,785	0,0013167680267078	9
MMP2	6.98249e+07	0,305717495347956	0,969	0,907	0,00139649848457091	9
PDPN1	7.37487e+07	0,260310473394991	1	0,783	0,00147497376853696	9
TPM1	1.28565e+07	0,75282460087116	0,781	0,62	0,00257130198314839	9
CSRP2	1.38804e+08	0,649898492205367	0,969	0,701	0,00277608011749113	9
CTSC3	1.53542e+08	0,442742280115896	0,969	0,651	0,00307084812178843	9
MEF2C3	1.9202e+08	0,631586451653565	0,938	0,882	0,00384039366652582	9
EPAS1	2.14199e+08	0,618024019138771	0,719	0,291	0,00428398993404929	9
VAMP5	2.66055e+08	0,389678313457826	0,906	0,694	0,00532110262677668	9
FHL1	2.75021e+08	0,275684547171943	1	0,92	0,00550041545256514	9
AKAP12	2.83885e+08	0,396573711881354	1	0,758	0,0056777070372203	9
CCDC3	3.13437e+08	0,347214700955544	0,875	0,467	0,00626874454853423	9
PDGFRB	3.40556e+08	0,718086097054619	0,938	0,79	0,00681111638769586	9
CD591	4.01226e+08	0,436684306897533	1	0,927	0,00802452539774378	9
IFITM2	4.05848e+08	0,400839263331008	0,969	0,638	0,00811696093530893	9
CEBPD1	4.39411e+08	0,532349728639187	1	0,839	0,00878821427623359	9
NET1	5.20642e+08	0,413936476841302	0,938	0,626	0,0104128476703195	9
FILIP1L1	5.8492e+08	0,513712614691602	0,844	0,602	0,011698408630066	9
GRASP2	8.47882e+08	0,27817612656863	0,938	0,739	0,016957632690759	9
ZFP36L12	8.5895e+08	0,363663002856925	1	0,932	0,0171790019756688	9
C1R2	8.79047e+08	0,337065536252939	0,969	0,702	0,01758093227747	9
SELENOM2	8.97833e+08	0,371908472479784	0,969	0,887	0,0179566566384455	9
MYL9	1.26828e+09	0,980863006361921	0,812	0,458	0,0253656095145986	9
ASPH	1.30077e+09	0,422445507098785	0,781	0,485	0,0260154318915466	9
SOX18	1.32471e+09	0,323298530107796	0,906	0,461	0,0264942245028757	9
COL1A11	1.52653e+09	111947294545672	0,969	0,889	0,0305306283719138	9
COL6A21	1.97101e+09	0,840130723075134	0,781	0,659	0,0394201299256269	9
RGS5	3.24276e+09	102387518673891	0,688	0,376	0,0648552839291178	9
ECSCR	3.72507e+09	0,476058598724265	0,5	0,073	0,0745013537649942	9
EHF	4.0811e+09	0,278356877945478	0,938	0,604	0,0816220322252556	9
COL18A1	4.55409e+09	0,258139636375518	0,938	0,57	0,0910817820649287	9
PHLDA13	5.20482e+09	0,297351072778566	1	0,953	0,104096452560143	9
GADD45B3	5.82933e+09	0,457767977783304	1	0,967	0,116586519055553	9
C1QTNF1	5.92849e+09	0,315552778054398	0,938	0,878	0,118569743555239	9
HSPB11	9.07744e+09	0,294809843958942	1	0,858	0,181548888206107	9
CDKN1C	9.27403e+09	0,305834447695293	0,781	0,654	0,18548051402453	9
EDNRA	9.77206e+09	0,335955487333553	0,875	0,674	0,195441108910703	9
FOSL2	0,000108961741178951	0,258353992853782	0,969	0,79	0,217923482357903	9
PRSS231	0,000110414756343312	0,278686909768811	0,969	0,801	0,220829512686624	9
TPM2	0,000118213637971987	0,566910535629024	0,969	0,698	0,236427275943974	9
MAP1B	0,000121915988012912	0,491245441862307	0,688	0,291	0,243831976025824	9
LIMS11	0,000125122418086422	0,25648274095566	0,938	0,768	0,250244836172845	9
UGCG1	0,00013634229712597	0,267021704503985	0,844	0,703	0,27268459425194	9
GSN1	0,000144598245321419	0,304027755142575	0,875	0,597	0,289196490642838	9
PSAP1	0,000157481738404412	0,267395694598925	0,969	0,865	0,314963476808824	9
DUSP231	0,000199783473296081	0,274539897917792	0,844	0,466	0,399566946592162	9
H1FX2	0,000233335572119577	0,279295124815448	1	0,95	0,466671144239153	9
NOTCH31	0,000235126449862515	0,444932802101523	0,5	0,211	0,470252899725031	9
NDUFA4L21	0,000293455785341334	0,394522325244983	0,75	0,484	0,586911570682668	9
RGS161	0,000324703643957366	0,983264667526279	0,875	0,8	0,649407287914733	9
ARHGAP291	0,000363954847331672	0,529466226924423	0,594	0,213	0,727909694663345	9
SPON21	0,000377621037612841	0,293825488555151	0,594	0,358	0,755242075225682	9
SLC9A3R2	0,000467882434791879	0,361215110760358	0,656	0,319	0,935764869583759	9
C1S	0,000479126230633624	0,362859506962587	0,875	0,716	0,958252461267247	9
ACTA2	0,000534504415548801	147756984969186	0,875	0,784	1	9
EMP1	0,000613304890260362	0,263565163930961	0,812	0,529	1	9
SERPING1	0,000625529237887366	0,291910110938156	0,781	0,728	1	9
ACKR3	0,000746892824278212	0,261197374171367	0,719	0,563	1	9
HSPG2	0,000773690882720114	0,353941116966952	0,875	0,795	1	9
NPDC1	0,000801292158028164	0,365949776201947	0,656	0,309	1	9
PDGFB	0,00101088679474106	0,299512005614172	0,812	0,586	1	9
EPS8	0,00120557874035368	0,3534677617416	0,625	0,504	1	9
MMRN1	0,00126571676670093	0,517553528450894	1	0,901	1	9
PDGFA	0,00127335800855255	0,278778253317732	0,938	0,847	1	9
TXNIP1	0,00160605255171815	0,368828131442391	0,906	0,765	1	9
GIMAP7	0,0017783422257508	0,288688965446909	0,375	0,647	1	9
ACKR1	0,00198106611010321	0,833620941179925	0,25	0,324	1	9
NFKBIA3	0,00280755858640504	0,350770976138258	1	0,957	1	9
TPPP3	0,00283048767900991	0,26598356734891	0,594	0,395	1	9
TIMP21	0,00311664513422283	0,355914236690014	0,875	0,736	1	9
STOM	0,0032186314771523	0,332332979749513	0,719	0,498	1	9
LDB2	0,00335299520606926	0,309279853900612	0,781	0,666	1	9
EVA1B	0,00339825243613096	0,332204783529486	0,812	0,74	1	9
MDK	0,00378007737290003	0,285849627238995	0,969	0,907	1	9
IGFBP61	0,00393732131753422	0,309943933241067	0,719	0,455	1	9
IGFBP22	0,00471755064574455	0,375176518014173	0,938	0,81	1	9
ZEB23	0,00516727393274616	0,375429880839112	0,719	0,7	1	9
IGFBP3	0,00655040646534538	0,400164977428361	0,656	0,425	1	9
LHFPL6	0,0066553434915894	0,516153065666978	0,719	0,691	1	9
SSR43	0,00745729357230801	0,250901425239166	1	0,954	1	9
CBR13	0,00817913308551636	0,251348734703162	1	0,825	1	9
PECAM1	0,00837755171475505	0,567376895905208	0,844	0,778	1	9
PRRX1	0,00861788949394734	0,366856879740867	0,812	0,616	1	9
EBF1	0,00880737260061736	0,327492018421944	0,906	0,887	1	9
RRAD	0,00933137435663444	0,284333003890032	1	0,92	1	9
